# Supplementary material for: Scoping review assessing the evidence used to support the adoption of mobile health (mHealth) technologies for the education and training of community health workers (CHWs) in low-income and middle-income countries
Source: PubMed Central journal article supplement — BMJ Open. 2018 Jul 30;8(7):e019827. doi: 10.1136/bmjopen-2017-019827 (PMC6067337; doi:10.1136/bmjopen-2017-019827), 2018-07-30
Supplement: bmjopen-2017-019827.draft_revisions.pdf [file bmjopen-2017-019827.draft_revisions.pdf]

# BMJ Open

BMJ Open is committed to open peer review. As part of this commitment we make the peer review history of every article we publish publicly available.

When an article is published we post the peer reviewers' comments and the authors' responses online. We also post the versions of the paper that were used during peer review. These are the versions that the peer review comments apply to.

The versions of the paper that follow are the versions that were submitted during the peer review process. They are not the versions of record or the final published versions. They should not be cited or distributed as the published version of this manuscript.

BMJ Open is an open access journal and the full, final, typeset and author-corrected version of record of the manuscript is available on our site with no access controls, subscription charges or pay-per-view fees (<http://bmjopen.bmj.com>).

If you have any questions on BMJ Open's open peer review process please email [info.bmjopen@bmj.com](mailto:info.bmjopen@bmj.com)

# BMJ Open

## **A scoping review assessing the evidence used to support the adoption of mobile health (mHealth) technologies for the education and training of community health workers (CHWs) in low- and middle-income countries**

|                                 |                                                                                                                                                                              |
|---------------------------------|------------------------------------------------------------------------------------------------------------------------------------------------------------------------------|
| Journal:                        | <i>BMJ Open</i>                                                                                                                                                              |
| Manuscript ID                   | bmjopen-2017-019827                                                                                                                                                          |
| Article Type:                   | Research                                                                                                                                                                     |
| Date Submitted by the Author:   | 28-Sep-2017                                                                                                                                                                  |
| Complete List of Authors:       | Winters, Niall; University of Oxford, Education<br>Langer, Laurenz; University of Johannesburg, Africa Centre for Evidence<br>Geniets, Anne; University of Oxford, Education |
| <b>Primary Subject Heading</b>: | Global health                                                                                                                                                                |
| Secondary Subject Heading:      | Medical education and training                                                                                                                                               |
| Keywords:                       | mHealth, Community Health Worker, Education and Training, Scoping Review, Global Health                                                                                      |
|                                 |                                                                                                                                                                              |

SCHOLARONE™  
Manuscripts

1 **A scoping review assessing the evidence used to support the adoption of mobile**  
2 **health (mHealth) technologies for the education and training of community health**  
3 **workers (CHWs) in low- and middle-income countries**  
4

5  
6 **Niall Winters** (*Corresponding author*)

7 Department of Education, University of Oxford  
8 15 Norham Gardens  
9 Oxford OX2 6PY  
10 UK  
11

12 Email: [niall.winters@education.ox.ac.uk](mailto:niall.winters@education.ox.ac.uk)

13 Tel.: +44 1865 274 007

14 Fax.: +44 1865 274 027  
15

16  
17 **Laurenz Langer**, University of Johannesburg, Johannesburg, South Africa  
18

19 **Anne Geneits**, University of Oxford, Oxford, UK  
20

21 **Contributor Statement:** Activities undertaken by the authors were as  
22 follows: Establishment of research question/s and development of search strategy: NW  
23 and LL. Background framing: NW & AG. Database search and record screening: LL.  
24 Extraction of primary studies from the included reviews: LL and NW. Recoding: NW and  
25 LL. Discussion & Conclusion: NW, LL and AG.  
26  
27  
28  
29

30 **KEYWORDS:** mHealth, Global Health, Community Health Worker, Education and  
31 Training, Scoping Review  
32

33 **Word count:** 5,185  
34  
35  
36  
37  
38  
39  
40  
41  
42  
43  
44  
45  
46  
47  
48  
49  
50  
51  
52  
53  
54  
55  
56  
57  
58  
59  
60

## ABSTRACT

### Objectives

Undertake a systematic scoping review to determine how a research evidence base, in the form of existing systematic reviews in the field of mobile health (mHealth), constitutes education and training for community health workers who use mobile technologies in everyday work. The review was informed by the following research questions: Does educational theory inform the design of the education and training component of mobile health (mHealth) interventions? How is education and training with mobile technology by CHWs in low- and middle-income countries categorised by existing systematic reviews? What is the basis for this categorisation?

### Setting

The review explored the literature from 2000 to 2017 to investigate how mHealth interventions have been positioned within the available evidence base in relation to their use of formal theories of learning.

### Results

The scoping review found 24 primary studies that were categorised by 16 systematic reviews as supporting CHWs' education and training using mobile technologies. However, when formal theories of learning from educational research were used to re-categorise these 24 primary studies, only four could be coded as such. This identifies a problem with how CHWs' education and training using mobile technologies is understood and categorised within the existing evidence base. This is because there is no agreed upon, theoretically informed understanding of what counts as learning.

### Conclusion

The claims made by mHealth researchers and practitioners regarding the learning benefits of mobile technology are not based on research results that are underpinned by formal theories of learning. mHealth suffers from a reductionist view of learning that underestimates the complexities of the relationship between pedagogy and technology. This has resulted in miscategorisations of what constitutes CHWs' education and training within the existing evidence base. This can be overcome by informed collaboration between the health and education communities.

### Strengths and limitations of this study

- The study applied an innovative three-step scoping review methodology to unpack the evidence on mobile technology's contribution to the education and training of CHWs.
- In-depth primary analysis determined if theories of learning were used to conceptualise and categorise education and training in mHealth.
- The study details if these theories were used to design and implement the education and training component of mHealth interventions for CHWs.
- The in-depth primary analysis of theories of learning is limited to programmatic information reported in the identified primary studies.

- The review is limited to papers included in systematic reviews published between 2000-2017.

## INTRODUCTION

The popularity of mobile phones in low- and middle-income countries (LMICs) has motivated their use in healthcare, particularly as a tool to support primary health care outreach by community health workers (CHWs) to those with little or no access to health care. While the role, level of training and expertise of CHWs differs across LMICs (see [1] for a discussion of their role in Kenya), they are a vital part of strategies to overcome weakness in health systems. Mobile technology is increasingly viewed as essential to the work of CHWs.

The field of mobile health (mHealth) investigates the role mobile technologies can play in healthcare. mHealth has many functionalities [2-3], one of which is to provide education and training for CHWs. Delivering individual access to educational material is the primary means of achieving this [4], particularly in contexts where face-to-face training is limited. Yet, such information dissemination models of education are well known to miss the wider social and cultural aspects of learning inherent to healthcare practice [5] and more relevant educational theories, including inquiry learning, experiential learning and situated learning, are used in other areas of healthcare practice [6–8].

Educational researchers have built on these foundational theories to develop concepts of workplace-based learning and mobile learning [9, 10] which are designed to support learners to produce new knowledge using technology while working. However, it is unclear if or how workplace-based learning and mobile learning research has been incorporated into mHealth platforms. Preliminary indicators suggest this is not the case. For example, in Labrique et al.'s [11] widely regarded mHealth framework, none of the example interventions in the category 'provider training and education' are informed by formal theories of workplace-based or mobile learning [11: 164]. Other categories, such as 'electronic decision-support' could be considered workplace-based learning. The problem is further complicated by the fact that in two systematic reviews [3, 12] of mHealth interventions, the same underlying mechanisms of information dissemination and increased communication are applied to two very different challenges: (a) patient education for behaviour change and (b) CHWs' continuous professional development. Yet, from an educational perspective, it is challenging to equate mHealth interventions that provide health-related information with interventions trying to change CHW's practice and support professional development; the underlying pedagogical mechanisms required for both types of interventions differ significantly in nature and scale.

Consequently, there is a pressing need to understand: 1) If and how educational theories are being incorporated into mHealth platforms currently? 2) How the adoption of a novel educational lens can inform the future development of mHealth technology for use by CHWs?

While multiple reviews of mHealth in LMICs have recently been published, this systematic scoping review is the first to combine theories of workplace-based learning and mobile learning and apply them to mHealth research on education and training for CHWs in LMICs. The focus of the review is not on measurable endpoints of education and training but rather on how the educational components have been conceptualised within existing mHealth research.

## METHODS

### *Review approach:*

We conducted a systematic scoping review of the research evidence on the use of mobile technologies to facilitate CHWs' education and training in LMICs. A scoping review is defined as "a form of knowledge synthesis that addresses an exploratory research question aimed at mapping key concepts, types of evidence, and gaps in research related to a defined area or field by systematically searching, selecting, and synthesizing existing knowledge" [13: 1292]. Scoping reviews are part of the family of research synthesis methods, but compared to systematic reviews address broader research questions. They aim to provide an overview and organisation of existing knowledge rather than a narrow synthesis of a predefined research question [14, 15]. Usually, this different synthesis approach is conducted over a shorter timeframe than systematic reviews, using more targeted search terms and focuses less on the critical appraisal of the included evidence.

A scoping review approach was chosen for this study because we wanted to explore how existing literature has conceptualised and operationalised the use of mobile technologies to support CHWs' learning practices. The focus is on the diversity of understandings and definitions of CHWs' education and training in the existing literature and what patterns and gaps might emerge from a systematic analysis of this body of knowledge<sup>1</sup>. In order to capture the conceptualisation and positioning of mHealth interventions that have an education or training component, our scoping review targeted existing systematic reviews of mHealth interventions rather than primary studies as a first level of analysis. Unlike primary studies, these reviews require an explicit conceptual framework—including Labrique's framework—in order to group mHealth interventions for analysis. Consequently, we can derive the positioning and categorisation of different mHealth interventions with respect to their support for CHWs' education and training from these systematic reviews.

Our scoping review followed explicit and transparent research steps to explore the research evidence on mHealth and CHWs' education and training. A review protocol was not published and the study was not registered with PROSPERO, as these mechanisms are not applied to scoping reviews [13, 14].

We followed a novel three-step approach in our scoping review that combined secondary research methods with a primary re-analysis of the included studies. In the first step, existing systematic reviews investigating CHWs' education and training when using mobile technologies were sought. As outlined above, this novel approach was necessary to allow us to investigate how different mHealth interventions were categorised in relation to education and training within the evidence base. In the second step, we then extracted the primary studies included in these reviews in order to provide a descriptive account of the included mHealth interventions and the wider characteristics of the evidence base. In the third step, we conducted a primary re-analysis of the included mHealth interventions, which were recoded with respect to their education or training component. That is, we used two coding frameworks inspired by different theories of learning—workplace-based learning [9] and mobile learning [10]—and applied these coding frameworks to the primary studies included in the systematic review. As a result, we obtained two different set of results on how mHealth interventions were categorised regarding their support for CHWs' education and training: (i) the categorisation of interventions in the systematic reviews themselves and (ii) our re-categorisation of the same interventions using explicit learning

---

<sup>1</sup> We were not concerned with whether mobile technologies are effective in increasing learning outcomes or how CHWs perceive the use of mobile technologies. These types of research questions lend themselves to full systematic reviews.

1 from educational research. These two sets of categorisations allowed us to juxtapose the  
2 prevailing positioning and understanding of education and training in mHealth with a more  
3 pedagogically grounded understanding. A more traditional review approach, without this  
4 re-analysis of primary studies, would not have allowed us to juxtapose these different  
5 understandings. The same applies had we followed a systematic review approach that  
6 only included primary studies and not the existing reviews themselves. We elaborate on  
7 the methods employed in each step below.  
8  
9

## 10 **Step 1: Review of existing systematic reviews**

### 12 *Search methods:*

13 We designed an exhaustive and sensitive search strategy to identify all relevant reviews of  
14 mHealth interventions that included CHWs' education and training facilitated by mobile  
15 technologies in LMICs. The search strategy was deliberately designed to be over-  
16 inclusive. Search terms were formulated to identify any mHealth review covering LMICs  
17 and we manually filtered down the reviews relevant to CHWs' education and training.  
18 Likewise, despite being focused on CHWs in our review, our search strategy did not  
19 specify terms related to CHWs. Both decisions ensured that no relevant reviews were  
20 excluded during the search. The full search terms therefore only included key words for  
21 the concepts 'mHealth', 'systematic review', and 'LMICs'. Concepts were combined using  
22 the AND boolean operator to develop a master search string (Supplementary Material 1).  
23  
24

25 The full search string was then applied to a range of academic databases in the health and  
26 social sciences: CINAHL; Pubmed; Medline; PsychInfo; ERIC; Education Full-text; and ISI  
27 web of science. Database searches covered the period 2000 to 2017. The year 2000 as a  
28 cut-off date was chosen as mobile technologies did not see widespread application to  
29 support health care in LMICs before then. In addition, we also searched the Grey literature  
30 for reviews relevant for inclusion. Grey literature sources included Google and Google  
31 Scholar searches as well as specialized systematic review databases, i.e. Cochrane  
32 Library of Systematic Reviews, Campbell Library, and the 3ie database of international  
33 development reviews. Lastly, reference lists of included reviews were used as an  
34 additional source for snowball searching for additional reviews. A full record of the  
35 conducted search is provided in Supplementary Material 2.  
36  
37

### 38 *Inclusion criteria:*

39 We formulated explicit inclusion criteria that determined what reviews were eligible for  
40 inclusion in our scoping review. Conceptually, this referred to existing systematic reviews  
41 of mHealth interventions that support CHWs' education and training in LMICs. To  
42 operationalise this into transparent inclusion criteria, the following definitions were applied.  
43  
44

45 Population: CHWs were defined broadly in line with the WHO's 2007 definition of lay  
46 health workers as applied in Lewin et al. [16]:  
47

48 "Community health workers should be members of the communities where they work,  
49 should be selected by the communities, should be answerable to the communities for  
50 their activities, should be supported by the health system but not necessarily a part of  
51 its organization, and have shorter training than professional workers."  
52

53 This definition allows for different types of health care workers to be classified as CHWs in  
54 different contexts. Reviews were included as long as they covered mHealth interventions  
55 applied by or for CHWs regardless of whether CHWs were the main focus of the review.  
56 LMICs were defined using the World Bank classification of economies [17]. To be  
57  
58  
59



1 included, reviews had to focus on LMICs and for reviews that had no regional scope, at  
2 least 50 per cent of the included studies had to be from LMICs in order for the review to be  
3 featured in our scoping review.  
4

5  
6 Intervention: Reviews had to include mHealth interventions that used mobile technology to  
7 facilitate CHWs' education and training. This excludes reviews that focus on fixed ICT  
8 infrastructure such as desktop PCs and fixed diagnostic ICTs only. Education and training  
9 was defined broadly and we followed the reviews' positioning of interventions as to how  
10 they facilitated learning. In addition, we included the following categories used in reviews  
11 based on Labrique et al's framework to ensure no relevant interventions were missed:  
12 Decision-support; provider-provider communication; provider work planning and  
13 scheduling; data collection and reporting. A systematic review covering any of the above  
14 categories was thus included in our scoping review. This was because each of these  
15 categories could potentially be framed as supporting the CHWs' education and training  
16 using conceptualisations of workplace-based learning and mobile learning. For example,  
17 improved communication between CHWs could support collaboration and social learning.  
18 Likewise, following explicit decision-making algorithms could lead to the learning and  
19 acquisition of new and improved practices by CHWs. Again, we aimed to be over-inclusive  
20 at this stage so as not to miss any relevant reviews.  
21

22  
23 Research design: To be included, studies had to qualify as a 'systematic review' which  
24 was defined broadly for this scoping review. Any type of research synthesis was included  
25 as long as a structured and transparent review approach was applied. Indicators of a  
26 structured review approach referred to: reporting of (i) a systematic search; (ii) pre-defined  
27 inclusion criteria; and (iii) a stated method of synthesis. Indicators of a transparent review  
28 approach referred to: reporting of (i) numbers of searched and included studies; (ii) a  
29 summary table of included studies; and (iii) a discussion of the strengths of the evidence in  
30 the synthesis.  
31

32  
33 Outcomes: No studies were excluded on the basis of measured outcomes or applied  
34 outcome measures because intervention effectiveness was not of concern in this scoping  
35 review.  
36

#### 37 *Screening and coding of reviews:*

38 Two reviewers screened all search hits for potentially relevant systematic reviews at title  
39 and abstract. Full-texts of potentially relevant reviews were then sought and screened  
40 again against our inclusion criteria. A sub-set of 10 per cent of the citations eligible of full-  
41 text screening were double-screened to assess inter-reviewer reliability. Disagreements  
42 between reviewers were resolved by joint discussion with a third reviewer acting as an  
43 arbitrator. Following the screening, included systematic reviews were then coded for two  
44 high-level characteristics: (i) applied framework to categorise interventions and (ii) included  
45 mHealth interventions.  
46

#### 47 *Critical appraisal:*

48 As this is a scoping review, no critical appraisal of either included reviews or primary  
49 studies was conducted.  
50

## 51 **Step 2: Extraction of primary studies from the included reviews**

#### 52 *Identification of primary studies:*

53 Having identified eligible reviews, we then extracted the primary studies included in each  
54 review for further analysis. That is, the included systematic reviews served as the data  
55  
56  
57  
58  
59



1 source for primary studies. We only searched the relevant systematic reviews under the  
2 intervention categories that could potentially relate to education and training. Extracting  
3 only primary studies that existing systematic reviews had coded and categorised as  
4 related to education and training allows us to unpack and examine this positioning.  
5  
6

7 We did not conduct an independent scientific search for relevant primary studies in  
8 addition to the search for systematic reviews. Including primary studies that were not found  
9 in existing systematic reviews would not have revealed any new information regarding how  
10 the primary studies were categorised. As a result, primary studies of mHealth interventions  
11 and CHWs that were not included in any of the systematic reviews were excluded from our  
12 scoping review. In practice, this refers mainly to primary studies published after the  
13 included systematic reviews were conducted<sup>2</sup>.  
14

#### 15 *Inclusion criteria for primary studies:*

16 In terms of population, intervention, and outcome the inclusion criteria of the primary  
17 studies were identical to the criteria for systematic reviews. In terms of study design,  
18 however, primary studies could be of any empirical research design that investigated an  
19 applied mHealth intervention. This included both quantitative and qualitative research  
20 designs but excluded design that assessed interventions in a lab setting and/or assessed  
21 perceptions and feasibility of a future intervention implementation [e.g. 20, 21].  
22  
23

#### 24 *Screening and coding of primary studies:*

25 All primary studies allocated to the eligible intervention categories explained above were  
26 screened at full-text by two reviewers. The same quality assurance processes as used for  
27 the screening of the systematic reviews were implemented. We designed an explicit  
28 coding tool to capture key characteristics related to the type of CHWs, the type of mHealth  
29 intervention and technology applied, the context in which it was applied, as well as the  
30 educational event or process facilitated by the technology.  
31  
32

### 33 **Step 3: Primary analysis of study's categorisation as supporting the education and 34 training of CHWs**

35 Two well-established coding frameworks from educational research feature the key  
36 pedagogical attributes of workplace-based and mobile learning: Eraut and Hirsh [9] for  
37 workplace-based learning and Kearney et al [10] for mobile learning. Applying these two  
38 frameworks as our coding tool allowed us to re-code the primary studies in order to  
39 investigate whether their claim to facilitate CHWs' education and training did hold true from  
40 a pedagogical perspective. In this last step, we thus can compare the outcomes of this  
41 pedagogically-informed coding tool with the reported codes in the reviews. Again, two  
42 independent reviewers applied the coding tool with a third reviewer acting as an arbitrator  
43 in case of disagreement.  
44  
45

#### 46 *Review limitations*

47 There are three key limitations to this review. First, only English-language articles were  
48 considered for inclusion. Second, systematic reviews published up to 2017 only cover  
49 primary studies published up to 2015. Studies published after this date were not identified  
50 by the systematic reviews and by extension are not covered by our scoping review. Third,  
51 only a partial range of grey literature was searched and mHealth conferences were not  
52 covered.  
53

## 54 **FINDINGS**

55  
56  
57 <sup>2</sup> The searches undertaken by the authors of the two most up-to-date systematic reviews [18, 19] included in  
58 our scoping review were finalised in December 2015.  
59

1  
2  
3 *Search results:*

4 Searches were run between March and May 2016 and updated in June 2017. They  
5 yielded a total of 5,379 citations from twelve different sources (Figure 1). After screening  
6 these citations on title and abstract, the large majority of citations were not relevant  
7 (n=5,281)—a result of our deliberately over-inclusive search strategy. We identified 98  
8 existing reviews that on title and abstract met our inclusion criteria. Full-texts of these  
9 reviews were then sought and reviews screened for inclusion in more detail. This in-depth  
10 screening excluded a further 82 reviews leaving only 16 reviews that met the predefined  
11 inclusion criteria. Reasons for exclusion at full-text screening referred to: reviews not  
12 including studies from LMICs (n=33); not including studies that focus on CHWs as a  
13 population (n=22); not classified as following a structured and transparent review method  
14 (n=13); not including studies that focus on mobile technologies to facilitate training and  
15 learning (n=12); and; not including studies that focus on mobile technologies (n=2). As a  
16 result, we were left with 16 reviews that included research evidence on the application of  
17 mobile technologies to facilitate learning CHWs' education and training in LMICs.  
18

19  
20 In a second step, we then extracted the primary studies included in the 16 systematic  
21 reviews. We only extracted primary studies that were coded in the reviews to fit  
22 intervention categories associated with CHWs' education and training. As explained  
23 above, this referred to: provider training and education; decision-support; provider-provider  
24 communication; provider work planning and scheduling; data collection and reporting.  
25 Controlling for duplicates, we identified 24 studies that were included in the systematic  
26 reviews. Supplementary Material 3 provides a list of all systematic reviews and primary  
27 studies that were included in our scoping review.  
28  
29  
30  
31  
32  
33  
34  
35  
36  
37  
38  
39  
40  
41  
42  
43  
44  
45  
46  
47  
48  
49  
50  
51  
52  
53  
54  
55  
56  
57  
58  
59  
60

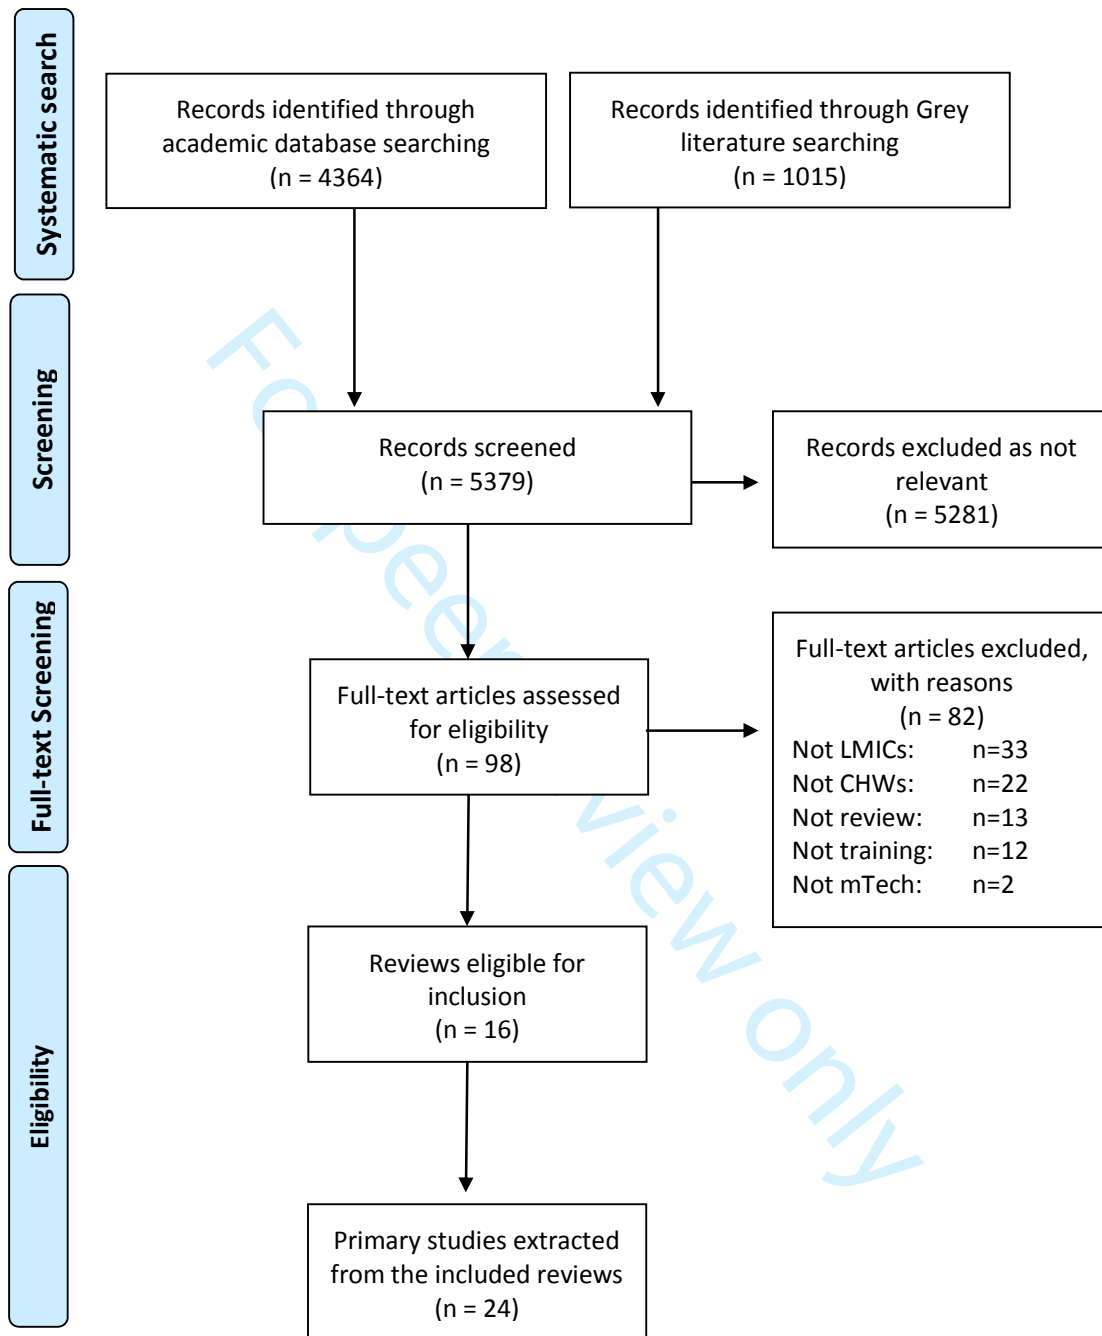

Figure 1 PRISMA flow chart of identification and inclusion of studies

### *Description of mHealth interventions: how did they facilitate CHWs' education and training?*

We extracted descriptive information from all 24 included primary studies using a structured coding tool. A summary table of the extracted data per study is presented in Supplementary Material 4. Of the 24 primary studies extracted from the 16 systematic reviews, three were undertaken in Kenya, three in Malawi, three in Tanzania, two in Ghana, two in Rwanda, and two in South Africa. One study was undertaken in: Bangladesh, Ethiopia, Guatemala, Nigeria, Liberia, Uganda, India and Pakistan respectively. One study was conducted in multiple countries (Mexico and Guatemala). Seventeen studies were undertaken in a rural setting, one in both urban and rural, one peri-urban, and four urban, with one setting undetermined. SMS was used in eight of the studies (including RapidSMS and FrontlineSMS), CommCare in five studies, MoTECH in one, Java Applets in three, customised designs in three, and standard voice calls in two. One tool was undetermined and one used a Palm Pilot PDA.

Intervention participants were described as CHWs in 13 studies while two studies referred to traditional birth attendants. In nine studies, different terms were used to describe health care workers fitting the above definition of CHWs. Examples of these include: village elders, community health volunteer, health surveillance assistant, and accredited social health activist. The number of CHWs involved in the mHealth interventions ranged from 5 to 638 with a median of 75. Only seven studies reached more than 100 CHWs<sup>3</sup>.

The 24 studies included in the 16 systematic reviews reported a range of mHealth interventions that were positioned to facilitate CHWs' education and training. Of the 24 extracted primary studies, a majority were grouped by the systematic reviews to provide direct training and education to CHWs (n=16) (Figure 2). This could refer, for example, to using mobiles to facilitate continued professional development (CPD). A similar number of studies used mobile devices to enhance the communication between CHWs as well as with their supervisors (n=14). For instance, through use of SMS feedback and rapid response services in order to enhance CHWs' access to information and support learning. Other common intervention categories referred to the application of mobiles to train CHWs to collect and manage medical data (n=13); the use of technology-supported decision-making tools (n=11); and the facilitation of supervision of CHWs (n=8).

### *Methodological approaches*

A variety of methodological approaches with a range of research methods and designs were used: case study (n=7), pilot study (n= 6), mixed methods (n=4), quasi-experimental designs (n=4). There were only two RCTs and one technical evaluation, and one study where the methods used could not be determined.

### *Discrepancies in categorisation*

The same studies reported by different reviews were not consistently categorised in their relation to CHWs' education and training. For example, a study that reported on mobile phone text-message reminders to support Kenyan health workers' adherence

---

<sup>3</sup> In all but one study [22], the CHWs involved in the mHealth intervention are synonymous with the research sample.

1  
2  
3 to malaria treatment guidelines [23], was included in five reviews but was  
4 alternatively categorised as a decision-support tool, a monitoring and compliance  
5 device, or as a training and education intervention (Supplementary Material 5). This  
6 pattern characterises the entire sample, where there is a large overlap between the  
7 primary studies included in the systematic reviews, but little overlap in their allocation  
8 to intervention categories. On average, each primary study is allocated to three  
9 different intervention categories across different or within reviews. Of the primary  
10 studies allocated to multiple categories (n=14), only four studies are consistently  
11 allocated to the same intervention category across reviews (see Supplementary  
12 Material 5, column 1). As a result, there seems to be little agreement between  
13 reviews regarding what type of interventions can directly facilitate CHWs' education  
14 and training and how such learning can be defined.  
15

16  
17 This is not surprising given that the challenges of categorisation are well known [24].  
18 However, given the large variance in the allocation of interventions, there is a need  
19 for mHealth researchers to develop a clearer understanding of what counts as  
20 education and training for CHWs. To overcome the seemingly *ad hoc* manner of  
21 categorisation, we used educational research to develop a refined coding tool (see  
22 Supplementary Material 5 and 6) This tool is based on pedagogical frameworks for  
23 workplace and mobile learning [9, 10], and is applied to assess the exact nature of  
24 education and training that was supported by the mHealth interventions.  
25

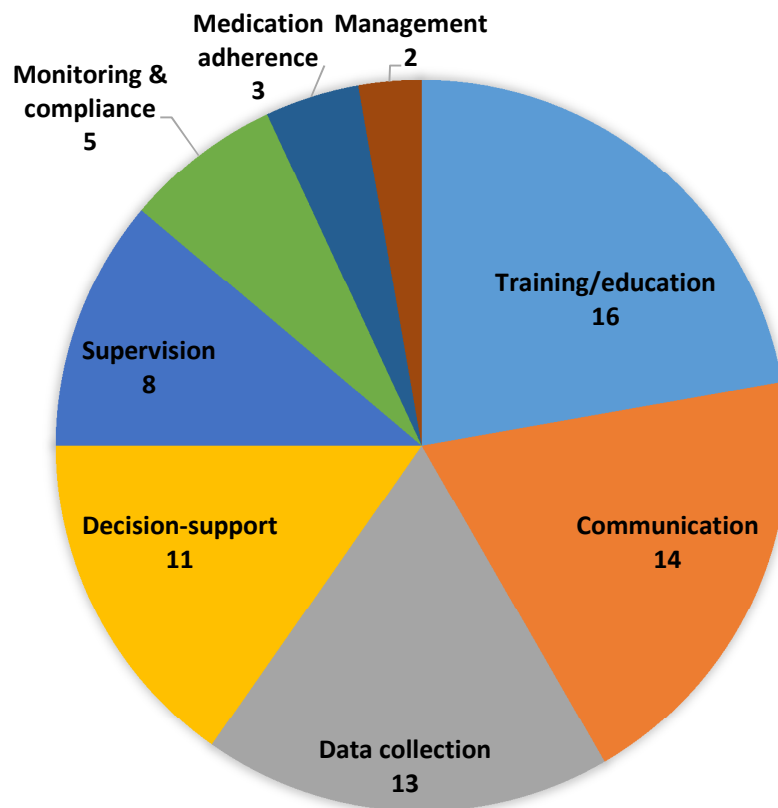

26  
27  
28  
29  
30  
31  
32  
33  
34  
35  
36  
37  
38  
39  
40  
41  
42  
43  
44  
45  
46  
47  
48  
49  
50  
51  
52  
53  
54 Figure 2 Overview of mHealth intervention categories featured in the included systematic review  
55

### *Step 3: Recoding of mHealth interventions using educational frameworks*

The results of our re-analysis of the included primary studies and whether the reported mHealth interventions could indeed be positioned to facilitate CHWs' education and training through the use of mobiles are presented in Supplementary Material 5.

In Supplementary Material 5, columns 2 and 3 show the findings of our recoding of whether the interventions can be classified as workplace learning (column 2) or mobile learning (column 3). From recoding the primary studies using the educational frameworks, we find that only four mHealth interventions [23, 25–27] could be positioned as facilitating CHWs' education and training through the use of mobile technology. That is, of the 24 studies that are allocated in the systematic reviews to categories associated with a potential educational use of technology, the allocation of 20 studies cannot be confirmed from a pedagogic perspective.

### **Discussion**

Of the four studies that remained after recoding, all exhibited elements of workplace-based and mobile learning (see Supplementary Material 6). However, the ways in which these elements were implemented was weak from an educational research perspective. The need to produce evidence on how mobile technology can support reflective and interactive forms of CHWs' education and training, particularly coaching, supervision and mentoring, remain critically neglected overall. mHealth interventions are not building effectively enough on previous global health research which has evidenced how good quality supervision "is one the key approaches to improving the quality of health care"[28: 3]. This is particularly true when it is backed up by regular support and feedback [29–34]

Instead, priority seemed to be given to easily scalable basic technologies that use an information dissemination model of learning to ensure CHW adherence to standardised practice (e.g. simplified guidelines on protocols sent via text messages). Learner agency was not a core priority. In three out of the four studies [23, 25, 26], agency was trumped by the need for CHWs to be held accountable to managerial oversight. Simplistic approaches, which focus on measuring the volume of information that CHWs are exposed to as a proxy for education and training have their limitations. It is unclear how they can empower CHWs, and there is a danger that the drive for improved efficiency through mobile technology could have the adverse effect of deprofessionalisation [35], potentially leading to a weakening of community-based health structures in the longer term.

Decision-support tools offer a means by which to generate insights into CHW practice and could be used as a medium to improve learning. However, the ways in which this could be implemented were not explored in detail. Svoronos et al [26] chose to focus on the details of system implementation. While in Blaschke et al, CHWs "stated that they felt empowered" [25: 24] by the automatic provision of a patient's weight for height calculation, but how this impacted on changes in practice through improved learning was not provided.

Instead of focusing on the developmental needs of CHWs, mHealth interventions in the main concentrate on providing CHWs with tools to support activities for which



1  
2  
3 they may not know the wider significance due to lack of training. Jones et al. [36] (the  
4 qualitative evaluation of the Zurovac et al [23] RCT) are open in the weaknesses of  
5 this aspect of their work: “it was clear that many of the participants believed that the  
6 type of training they received did not provide them with an adequate understanding  
7 of the importance of the new knowledge, or of the positive outcomes that a change in  
8 practice could bring” [36: 4]. They also noted that “few participants mentioned the  
9 messages in terms of ‘support supervision’, rather that they were made to feel  
10 somewhat guilty for not employing proper practice”. This is not surprising as using  
11 mobile technology for such a nuanced task as supportive supervision is challenging.  
12 Our previous work has demonstrated how CHWs and their supervisors used mobile  
13 messaging platforms (e.g. Whatsapp) to engage in virtual one-to-one, group, and  
14 peer-to-peer forms of supportive supervision [37]. Additional research is needed to  
15 investigate how technology can be embedded within successful supportive  
16 supervisory systems.  
17  
18

19 The one study that matched most closely what is known about mobile and workplace  
20 learning was Martínez-Fernández et al. [27]. In this study, mobile phones were used  
21 by 125 CHWs “to make consultations regarding issues about which they are unsure;  
22 send full epidemiological and clinical information related to the cases they attend;  
23 receive continuous training, and perform community health promotion and prevention  
24 activities through distance learning sessions” [27: 284]. After being given some  
25 technical training on phone use and data collection, they were provided with basic  
26 initial training in vital signs monitoring, and in the identification of signs of distress in  
27 children and pregnant women. The CHWs could use their phones for tele-  
28 consultations with medical staff (gynaecologists, paediatricians, internists and  
29 surgeons). Quarterly face-to-face training was augmented by tele-training. It is very  
30 clear that this intervention had a much stronger focus on ‘work processes as a by-  
31 product of learning’ including ‘consultation’ and ‘embedding on-going training within  
32 the intervention design’, a fact overlooked by the other interventions.  
33  
34

### 35 **Conclusion**

36 The findings from this scoping review suggest the mHealth literature is in danger of  
37 overclaiming regarding its ability to promote CHWs’ education and training within a  
38 work context. Studies claiming to have an educational component to their mHealth  
39 intervention were not often informed by educational theory nor was the educational  
40 approach taken well documented. The review has highlighted the need for more  
41 evidence on the precise nature of CHWs’ education and training that can be  
42 supported by mHealth interventions. This needs to start with improved  
43 categorisation, building on educational frameworks and richer accounts of learning  
44 [38]. The mechanisms for achieving educational outcomes are still unknown and  
45 educational theory should be embedded in the design of an intervention as well its  
46 evaluation – for which further cross-disciplinary work between global health and  
47 education is needed. Appropriate models of technology-enhanced learning (e.g. [39–  
48 41]) and extended use of educational theories will enable the development of much  
49 needed robust evidence on the role of technology in supporting CHWs’ education  
50 and training in mHealth.  
51  
52  
53

### 54 **Acknowledgments**

55 We thank X for their insightful comments and discussion.  
56  
57  
58  
59  
60

### Funding statement

This research received no specific grant from any funding agency in the public, commercial or not-for-profit sectors

### Competing interests

None declared

### Data Sharing

All relevant data are within the paper and supporting material.

### References

- [1] Oliver M, Geniets A, Winters N, et al. What do community health workers have to say about their work, and how can this inform improved programme design? A case study with CHWs within Kenya. *Glob Health Action* 2015;8(1):27168.
- [2] Braun R, Catalani C, Wimbush J, et al. Community health workers and mobile technology: a systematic review of the literature. *PloS One* 2013;8(6):e65772.
- [3] Hall CS, Fottrell E, Wilkinson S, et al. Assessing the impact of mHealth interventions in low-and middle-income countries—what has been shown to work?. *Glob Health Action* 2014;7(1):25606.
- [4] O'Donovan J, Bersin A, O'Donovan C. The effectiveness of mobile health (mHealth) technologies to train healthcare professionals in developing countries: a review of the literature. *BMJ Innov*;1(1):33-6.
- [5] Bleakley A. Broadening conceptions of learning in medical education: the message from teamworking. *Med Educ* 2006;40(2):150-7.
- [6] Sturmberg JP, Farmer L. Educating capable doctors—A portfolio approach. Linking learning and assessment. *Med Teach* 2009;31(3):e85-9.
- [7] Williams PL. Using theories of professional knowledge and reflective practice to influence educational change. *Med Teach* 1998;20(1):28-34.
- [8] Taylor DC, Hamdy H. Adult learning theories: Implications for learning and teaching in medical education: AMEE Guide No. 83. *Med Teach* 2013;35(11):e1561-72.
- [9] Eraut M, Hirsh W. The significance of workplace learning for individuals, groups and organisations. Skope Monograph Number 9. Accessed September 2017: <http://www.skope.ox.ac.uk/?person=the-significance-of-workplace-learning-for-individuals-groups-and-organisations>
- [10] Kearney M, Schuck S, Burden K, et al. Viewing mobile learning from a pedagogical perspective. *Research in learning technology* 2012;20(1):14406.

- 1  
2  
3 [11] Labrique AB, Vasudevan L, Kochi E, et al. mHealth innovations as health  
4 system strengthening tools: 12 common applications and a visual framework. *Global*  
5 *Health Sci Prac* 2013;1(2):160-71.  
6  
7 [12] Aranda-Jan CB, Mohutsiwa-Dibe N, Loukanova S. Systematic review on what  
8 works, what does not work and why of implementation of mobile health (mHealth)  
9 projects in Africa. *BMC Public Health*. 2014;14(1):188.  
10  
11 [13] Colquhoun HL, Levac D, O'Brien KK, et al. Scoping reviews: time for clarity in  
12 definition, methods, and reporting. *J Clin Epidemiol* 2014;67(12):1291-4.  
13  
14 [14] Arksey H, O'Malley L. Scoping studies: towards a methodological framework. *Int*  
15 *J Soc Res Methodol* 2005;8(1):19-32.  
16  
17 [15] Miake-Lye IM, Hempel S, Shanman R, et al. What is an evidence map? A  
18 systematic review of published evidence maps and their definitions, methods, and  
19 products. *Syst rev*. 2016;5(1):28.  
20  
21 [16] Lewin S, Munabi-Babigumira S, et al. Lay health workers in primary and  
22 community health care for maternal and child health and the management of  
23 infectious diseases. *Cochrane Database Syst Rev* 2010 Mar 17.  
24  
25 [17] World Bank. Country classifications. Accessed September 2017:  
26 <http://blogs.worldbank.org/opendata/category/tags/news>  
27  
28 [18] Adepoju IO, Albersen BJ, De Brouwere V, et al. mHealth for Clinical Decision-  
29 Making in Sub-Saharan Africa: A Scoping Review. *JMIR Mhealth Uhealth* 2017;5(3).  
30  
31 [19] Tian M, Zhang J, Luo R, et al. mHealth Interventions for Health System  
32 Strengthening in China: A Systematic Review. *JMIR Mhealth Uhealth* 2017;5(3).  
33  
34 [20] Florez-Arango JF, Iyengar MS, Dunn K, et al. Performance factors of mobile rich  
35 media job aids for community health workers. *J Am Med Inform Assoc*  
36 2011;18(2):131-7.  
37  
38 [21] Iyengar MS, Florez-Arango JF. Decreasing workload among community health  
39 workers using interactive, structured, rich-media guidelines on smartphones. *Technol*  
40 *Health Care* 2013;21(2):113-23.  
41  
42 [22] DeRenzi B, Findlater L, Payne J, et al. Improving community health worker  
43 performance through automated SMS. In: Proceedings of the Fifth International  
44 Conference on Information and Communication Technologies and Development  
45 2012 Mar 12: 25-34.  
46  
47 [23] Zurovac D, Sudoi RK, Akhwale WS, et al. The effect of mobile phone text-  
48 message reminders on Kenyan health workers' adherence to malaria treatment  
49 guidelines: a cluster randomised trial. *Lancet* 2011;378(9793):795-803.  
50  
51 [24] Bowker GC, Star SL. Sorting things out: Classification and its consequences.  
52 Cambridge: MIT Press 2000.  
53  
54  
55  
56  
57  
58  
59

1  
2  
3  
4 [25] Blaschke S, Bokenkamp K, Cosmaciuc R, et al. Using mobile phones to improve  
5 child nutrition surveillance in Malawi. Brooklyn, NY: UNICEF Malawi, UNICEF  
6 Innovations, Mobile Development Solutions. 2009.

7  
8 [26] Svoronos T, Mjungu P, Dhadialla R, et al. CommCare: Automated quality  
9 improvement to strengthen community-based health. Weston, Mass.: D-Tree  
10 International. 2010.

11  
12 [27] Martínez-Fernández A, Lobos-Medina I, Díaz-Molina CA, et al. TulaSalud: An  
13 m-health system for maternal and infant mortality reduction in Guatemala. *J Telemed*  
14 *Telecare* 2015;21(5):283-91.

15  
16 [28] Marquez L, Kean L. Making supervision supportive and sustainable: new  
17 approaches to old problems. *MAQ Working Paper No. 4 Accessed September 2017:*  
18 <https://www.k4health.org/sites/default/files/magpaperonsupervision.pdf>

19  
20 [29] Ashwell HE, Freeman P. The clinical competency of community health workers  
21 in the eastern highlands province of Papua New Guinea. *P N G Med J*  
22 1995;38(3):198-207.

23  
24 [30] Baqui AH, Arifeen SE, Rosen HE, et al. Community-based validation of  
25 assessment of newborn illnesses by trained community health workers in Sylhet  
26 district of Bangladesh. *Trop Med Int Health* 2009;14(12):1448-56.

27  
28 [31] Bhattacharji S, Abraham S, Muliyl J, et al. Evaluating community health worker  
29 performance in India. *Health Policy Plan* 1986;1(3):232-9.

30  
31 [32] Bhattacharyya K, LeBan K, Winch P, et al. Community health workers:  
32 incentives and disincentives: how they affect motivation, retention, and sustainability.  
33 Published by the Basic Support for Institutionalizing Child Survival Project (Basics II)  
34 for the United States Agency for International Development, Arlington, Virginia. 2001.  
35 Accessed September 2017: [http://pdf.usaid.gov/pdf\\_docs/Pnacq722.pdf](http://pdf.usaid.gov/pdf_docs/Pnacq722.pdf)

36  
37 [33] Laughlin M. The Care Group difference: A guide to mobilizing community-based  
38 volunteer health educators. Baltimore, Md, USA: World Relief, 2004. Accessed  
39 September 2017:  
40 <http://www.k4health.org/system%252Ffiles%252FCare%2BGroup%2BManual.pdf>

41  
42 [34] Lehmann U, Sanders D. Community health workers: what do we know about  
43 them. The state of the evidence on programmes, activities, costs and impact on  
44 health outcomes of using community health workers. Geneva: World Health  
45 Organization 2007.

46  
47 [35] Winters N, Oliver M, Langer L. Can mobile health training meet the challenge of  
48 'measuring better'?. *Comparative Education* 2017;53(1):115-31.

1  
2  
3 [36] Jones CO, Wasunna B, Sudoi R, et al. "Even if you know everything you can  
4 forget": health worker perceptions of mobile phone text-messaging to improve  
5 malaria case-management in Kenya. *PLoS One* 2012;7(6):e38636.  
6

7 [37] Henry JV, Winters N, Lakati A, et al. Enhancing the supervision of community  
8 health workers with WhatsApp mobile messaging: qualitative findings from 2 low-  
9 resource settings in Kenya. *Global Health Sci Prac* 2016;4(2):311-25.  
10

11 [38] Mayes T, De Freitas S. Technology-enhanced learning. In: Beetham H, Sharpe  
12 R. eds. *Rethinking Pedagogy for a Digital Age: Designing for 21st Century Learning*.  
13 London: Routledge 2013:17-30.  
14

15 [39] Laurillard D, Oliver M, Wasson B, et al. Implementing technology-enhanced  
16 learning. In: Balacheff N, Ludvigsen S, de Jong T, et al. eds. *Technology-enhanced  
17 learning: Principles and products*. Dordrecht: Springer 2009.  
18

19 [40] Davies C, Eynon R, editors. *Education and Technology: Major Themes in  
20 Education: Critical Issues in the Ongoing Development of the Field*. Routledge 2016.  
21  
22

23 [41] Selwyn N. *Education and technology: Key issues and debates*. London:  
24 Bloomsbury Publishing 2016  
25  
26  
27  
28  
29  
30  
31  
32  
33  
34  
35  
36  
37  
38  
39  
40  
41  
42  
43  
44  
45  
46  
47  
48  
49  
50  
51  
52  
53  
54  
55  
56  
57  
58  
59  
60

## Supplementary Material 1: Search terms

Search terms:

Mhealth terms: (mhealth OR m-health OR "mobile health" OR ((mobile technolog\* OR "mobile phone" OR "mobile device" OR phone OR tablet OR PDA OR "personal digital assistant" OR iPad OR iPod OR "smart phone" OR "feature phone" OR app OR "mobile application") AND Health) OR (("Text messag\*" OR "short messag\*" OR SMS OR "social media" OR "mobile communication") AND health)

Review terms: ("systematic review" OR "literature review" OR "meta-analysis" OR "review of reviews" OR "systematic map" OR "evidence map" OR "evidence gap map" OR "evidence synthesis" OR "research synthesis")

Developing country term: ("developing countr\*" OR LMICs OR "low- and middle-income countr\*" OR "low and middle income countr\*" OR Africa OR Asia OR "Latin America" OR "East\* Europe" OR "majority world" OR "global south")



## Supplementary Material 2: Systematic search records

| Source              | Terms                                                                                                                          | Results             |
|---------------------|--------------------------------------------------------------------------------------------------------------------------------|---------------------|
| Google Scholar      | ("mobile health" OR mHealth)<br>AND review AND<br>("developing countries" OR<br>LMICs OR Africa OR Asia<br>OR Latin America")  | 500: 51             |
|                     | Update 30 May 2017<br>(August 2016-May 2017)                                                                                   | 500: 14             |
| Google              | (Mhealth OR "mobile health")<br>AND review                                                                                     | 500: 34<br>Dups 18  |
|                     | Update 30 May 2017<br>(August 2016-May 2017)                                                                                   | 500: 10<br>Dups: 7  |
| 3ie                 | (Mhealth OR "mobile health")                                                                                                   | 1:1                 |
|                     | Update 30 May 2017<br>(August 2016-May 2017)                                                                                   | 7:3<br>Dups: 4      |
| Cochrane            | (Mhealth OR "mobile health")                                                                                                   | 4: 0                |
|                     | Update 30 May 2017<br>(August 2016-May 2017)                                                                                   | 3: 0                |
| Campbell            | (Mhealth OR "mobile health")                                                                                                   | 0                   |
|                     | Update 30 May 2017<br>(August 2016-May 2017)                                                                                   | 0                   |
| CINAHL              | Master string                                                                                                                  | 1247*: 64           |
|                     | Update 30 May 2017<br>(August 2016-May 2017)                                                                                   | 5: 2<br>Dups: 2     |
| Pubmed              | (Mhealth OR "mobile health")<br>OR ("mobile technology*"<br>AND health) AND<br>("systematic review" OR<br>"literature review") | 1008: 41            |
|                     | Update 30 May 2017<br>(August 2016-May 2017)                                                                                   | 46: 5<br>Dups: 4    |
| Medline             | Master string                                                                                                                  | 1247*: 64           |
|                     | Update 30 May 2017<br>(August 2016-May 2017)                                                                                   | 11: 7<br>Dups: 7    |
| PsychInfo           | (Mhealth OR "mobile health")                                                                                                   | 211*: 12            |
|                     | Update 30 May 2017<br>(August 2016-May 2017)                                                                                   | 13                  |
| ERIC                | (Mhealth OR "mobile health")                                                                                                   | 211*: 12            |
|                     | Update 30 May 2017<br>(August 2016-May 2017)                                                                                   | 13                  |
| Education Full-text | (Mhealth OR "mobile health")                                                                                                   | 211*: 12            |
|                     | Update 30 May 2017<br>(August 2016-May 2017)                                                                                   | 13                  |
| Isl web of science  | (Mhealth OR "mobile health")<br>OR ("mobile technology*"<br>AND health) AND<br>("systematic review" OR<br>"literature review") | 465: 82             |
|                     | Update 30 May 2017<br>(August 2016-May 2017)                                                                                   | 111: 14<br>Dups: 12 |

### Supplementary material 3: List of included systematic reviews and primary studies

#### Systematic reviews included in the scoping review

1. Hall, C.S., Fottrell, E., Wilkinson, S. and Byass, P., 2014. Assessing the impact of mHealth interventions in low-and middle-income countries—what has been shown to work?. *Global health action*, 7(1), p.25606.
2. Peiris, D., Praveen, D., Johnson, C. and Mogulluru, K., 2014. Use of mHealth systems and tools for non-communicable diseases in low-and middle-income countries: a systematic review. *Journal of cardiovascular translational research*, 7(8), pp.677-691.
3. Aranda-Jan, C.B., Mohutsiwa-Dibe, N. and Loukanova, S., 2014. Systematic review on what works, what does not work and why of implementation of mobile health (mHealth) projects in Africa. *BMC public health*, 14(1), p.188.
4. Agarwal, S., Perry, H.B., Long, L.A. and Labrique, A.B., 2015. Evidence on feasibility and effective use of mHealth strategies by frontline health workers in developing countries: systematic review. *Tropical medicine & international health*, 20(8), pp.1003-1014.
5. Källander, K., Tibenderana, J.K., Akpogheneta, O.J., Strachan, D.L., Hill, Z., ten Asbroek, A.H., Conteh, L., Kirkwood, B.R. and Meek, S.R., 2013. Mobile health (mHealth) approaches and lessons for increased performance and retention of community health workers in low-and middle-income countries: a review. *Journal of medical Internet research*, 15(1).
6. Braun, R., Catalani, C., Wimbush, J. and Israelski, D., 2013. Community health workers and mobile technology: a systematic review of the literature. *PLoS one*, 8(6), p.e65772.
7. Hurt, K., Walker, R.J., Campbell, J.A. and Egede, L.E., 2016. mHealth interventions in low and middle-income countries: a systematic review. *Global journal of health science*, 8(9), p.183.
8. Bloomfield, G.S., Vedanthan, R., Vasudevan, L., Kithei, A., Were, M. and Velazquez, E.J., 2014. Mobile health for non-communicable diseases in Sub-Saharan Africa: a systematic review of the literature and strategic framework for research. *Globalization and health*, 10(1), p.49.
9. Goel, S., Bhatnagar, N., Sharma, D. and Singh, A., 2013. Bridging the human resource gap in primary health care delivery systems of developing countries with mhealth: narrative literature review. *JMIR mHealth and uHealth*, 1(2).
10. O'Donovan, J., Bersin, A. and O'Donovan, C., 2015. The effectiveness of mobile health (mHealth) technologies to train healthcare professionals in developing countries: a review of the literature. *BMJ Innovations*, 1(1), pp.33-36.
11. Chib, A., van Velthoven, M.H. and Car, J., 2015. mHealth adoption in low-resource environments: a review of the use of mobile healthcare in developing countries. *Journal of health communication*, 20(1), pp.4-34.
12. Amoakoh-Coleman, M., Borgstein, A.B.J., Sondaal, S.F., Grobbee, D.E., Miltenburg, A.S., Verwijs, M., Ansah, E.K., Browne, J.L. and Klipstein-Grobusch, K., 2016. Effectiveness of mHealth interventions targeting health care Workers to improve pregnancy outcomes in low-and middle-income countries: a systematic review. *Journal of medical Internet research*, 18(8).
13. Adepoju, I.O.O., Albersen, B.J.A., De Brouwere, V., van Roosmalen, J. and Zweekhorst, M., 2017. mHealth for Clinical Decision-Making in Sub-Saharan Africa: A Scoping Review. *JMIR mHealth and uHealth*, 5(3).

14. Colaci, D., Chaudhri, S. and Vasan, A., 2016. mHealth Interventions in Low-Income Countries to Address Maternal Health: A Systematic Review. *Annals of Global Health*, 82(5), pp.922-935.
15. Tian, M., Zhang, J., Luo, R., Chen, S., Petrovic, D., Redfern, J., Xu, D.R. and Patel, A., 2017. mHealth Interventions for Health System Strengthening in China: A Systematic Review. *JMIR mHealth and uHealth*, 5(3).
16. White, A., Thomas, D.S., Ezeanochie, N. and Bull, S., 2016. Health worker mHealth utilization: a systematic review. *CIN: Computers, Informatics, Nursing*, 34(5), pp.206-213.

**Primary studies extracted from the systematic reviews and included in the scoping review**

1. Alam, M., Khanam, T. and Khan, R., 2010, December. Assessing the scope for use of mobile based solution to improve maternal and child health in Bangladesh: A case study. In *Proceedings of the 4th ACM/IEEE International Conference on Information and Communication Technologies and Development* (p. 3). ACM.
  2. Andreatta, P., Debpuur, D., Danquah, A. and Perosky, J., 2011. Using cell phones to collect postpartum hemorrhage outcome data in rural Ghana. *International Journal of Gynecology & Obstetrics*, 113(2), pp.148-151.
  3. Barrington, J., Wereko-Brobby, O., Ward, P., Mwafongo, W. and Kungulwe, S., 2010. SMS for Life: a pilot project to improve anti-malarial drug supply management in rural Tanzania using standard technology. *Malaria journal*, 9(1), p.298.
  4. Chang, L.W., Kagaayi, J., Arem, H., Nakigozi, G., Ssempijja, V., Serwadda, D., Quinn, T.C., Gray, R.H., Bollinger, R.C. and Reynolds, S.J., 2011. Impact of a mHealth intervention for peer health workers on AIDS care in rural Uganda: a mixed methods evaluation of a cluster-randomized trial. *AIDS and Behavior*, 15(8), p.1776.
  5. DeRenzi, B., Findlater, L., Payne, J., Birnbaum, B., Mangilima, J., Parikh, T., Borriello, G. and Lesh, N., 2012, March. Improving community health worker performance through automated SMS. In *Proceedings of the Fifth International Conference on Information and Communication Technologies and Development*(pp. 25-34). ACM.
  6. Diero, L., Rotich, J.K., Bii, J., Mamlin, B.W., Einterz, R.M., Kalamai, I.Z. and Tierney, W.M., 2006. A computer-based medical record system and personal digital assistants to assess and follow patients with respiratory tract infections visiting a rural Kenyan health centre. *BMC Medical Informatics and Decision Making*, 6(1), p.21.
  7. Zurovac, D., Sudoi, R.K., Akhwale, W.S., Ndiritu, M., Hamer, D.H., Rowe, A.K. and Snow, R.W., 2011. The effect of mobile phone text-message reminders on Kenyan health workers' adherence to malaria treatment guidelines: a cluster randomised trial. *The Lancet*, 378(9793), pp.795-803.
- Jones, C.O., Wasunna, B., Sudoi, R., Githinji, S., Snow, R.W. and Zurovac, D., 2012. "Even if you know everything you can forget": health worker perceptions of mobile phone text-messaging to improve malaria case-management in Kenya. *PLoS One*, 7(6), p.e38636.
- Zurovac, D., Larson, B.A., Sudoi, R.K. and Snow, R.W., 2012. Costs and cost-effectiveness of a mobile phone text-message reminder interventions to improve health workers' adherence to malaria guidelines in Kenya. *PLoS one*, 7(12), p.e52045.

8. Gisore, P., Shipala, E., Otieno, K., Rono, B., Marete, I., Tenge, C., Mabeya, H., Bucher, S., Moore, J., Liechty, E. and Esamai, F., 2012. Community based weighing of newborns and use of mobile phones by village elders in rural settings in Kenya: a decentralised approach to health care provision. *BMC pregnancy and childbirth*, 12(1), p.15.
  9. JSI. 2013. Supply Chains for Community Case Management – strategy and plan. Available from: <http://sc4ccm.jsi.com/about-sc4ccm/>
  10. Khan, A.J., Khowaja, S., Khan, F.S., Qazi, F., Lotia, I., Habib, A., Mohammed, S., Khan, U., Amanullah, F., Hussain, H. and Becerra, M.C., 2012. Engaging the private sector to increase tuberculosis case detection: an impact evaluation study. *The Lancet infectious diseases*, 12(8), pp.608-616.
  11. Lemay, N.V., Sullivan, T., Jumbe, B. and Perry, C.P., 2012. Reaching remote health workers in Malawi: baseline assessment of a pilot mHealth intervention. *Journal of health communication*, 17(sup1), pp.105-117.
  12. MacLeod, B., Phillips, J., Stone, A.E., Walji, A. and Awoonor-Williams, J.K., 2012. The architecture of a software system for supporting community-based primary health care with mobile technology: the mobile technology for community health (MoTeCH) initiative in Ghana. *Online Journal of Public Health Informatics*, 4(1).
  13. Mahmud, N., Rodriguez, J. and Nesbit, J., 2010. A text message-based intervention to bridge the healthcare communication gap in the rural developing world. *Technology and Health Care*, 18(2), pp.137-144.
  14. Ngabo, F., Nguimfack, J., Nwaigwe, F., Mugeni, C., Muhoza, D., Wilson, D.R., Kalach, J., Gakuba, R., Karema, C. and Binagwaho, A., 2012. Designing and Implementing an Innovative SMS-based alert system (RapidSMS-MCH) to monitor pregnancy and reduce maternal and child deaths in Rwanda. *The Pan African Medical Journal*, 13.
  15. Palazuelos, D., Diallo, A.B., Palazuelos, L., Carlile, N., Payne, J.D. and Franke, M.F., 2013. User perceptions of an mHealth medicine dosing tool for community health workers. *JMIR mHealth and uHealth*, 1(1).
  16. Ramachandran, D., Goswami, V. and Canny, J., 2010, December. Research and reality: using mobile messages to promote maternal health in rural India. In *Proceedings of the 4th ACM/IEEE international conference on information and communication technologies and development* (p. 35). ACM.
  17. Svoronos, T., Mjungu, P., Dhadialla, R., Luk, R., Zue, C., Jackson, J. and Lesh, N., 2010. CommCare: Automated quality improvement to strengthen community-based health. *Weston, Mass.: D-Tree International*.
  18. Tomlinson, M., Solomon, W., Singh, Y., Doherty, T., Chopra, M., Ijumba, P., Tsai, A.C. and Jackson, D., 2009. The use of mobile phones as a data collection tool: a report from a household survey in South Africa. *BMC Medical Informatics and Decision Making*, 9(1), p.51.
  19. Blaschke, S., Bokenkamp, K., Cosmaciuc, R., Denby, M., Hailu, B. and Short, R., 2009. Using mobile phones to improve child nutrition surveillance in Malawi. *Brooklyn, NY: UNICEF Malawi, UNICEF Innovations, Mobile Development Solutions*.
  20. Munro, M.L., Lori, J.R., Boyd, C.J. and Andreatta, P., 2014. Knowledge and skill retention of a mobile phone data collection protocol in rural Liberia. *Journal of Midwifery & Women's Health*, 59(2), pp.176-183.
- Lori, J.R., Munro, M.L., Boyd, C.J. and Andreatta, P., 2012. Cell phones to collect pregnancy data from remote areas in Liberia. *Journal of Nursing Scholarship*, 44(3), pp.294-301.

- 1  
2  
3 21. McNabb, M., Chukwu, E., Ojo, O., Shekhar, N., Gill, C.J., Salami, H. and  
4 Jega, F., 2015. Assessment of the quality of antenatal care services provided  
5 by health workers using a mobile phone decision support application in  
6 northern Nigeria: a pre/post-intervention study. *PLOS one*, 10(5),  
7 p.e0123940.
- 8 22. Martínez-Fernández, A., Lobos-Medina, I., Díaz-Molina, C.A., Chen-Cruz,  
9 M.F. and Prieto-Egido, I., 2015. TulaSalud: An m-health system for maternal  
10 and infant mortality reduction in Guatemala. *Journal of telemedicine and*  
11 *telecare*, 21(5), pp.283-291.
- 12 23. Little, A., Medhanyie, A., Yebyo, H., Spigt, M., Dinant, G.J. and Blanco, R.,  
13 2013. Meeting community health worker needs for maternal health care  
14 service delivery using appropriate mobile technologies in Ethiopia. *PloS*  
15 *one*, 8(10), p.e77563.
- 16 Medhanyie, A.A., Little, A., Yebyo, H., Spigt, M., Tadesse, K., Blanco, R. and  
17 Dinant, G.J., 2015. Health workers' experiences, barriers, preferences and  
18 motivating factors in using mHealth forms in Ethiopia. *Human resources for*  
19 *health*, 13(1), p.2.
- 20 Medhanyie, A.A., Moser, A., Spigt, M., Yebyo, H., Little, A., Dinant, G. and Blanco,  
21 R., 2015. Mobile health data collection at primary health care in Ethiopia: a  
22 feasible challenge. *Journal of Clinical Epidemiology*, 68(1), pp.80-86.
- 23
- 24 24. Surka, S., Edirippulige, S., Steyn, K., Gaziano, T., Puoane, T. and Levitt, N.,  
25 2014. Evaluating the use of mobile phone technology to enhance  
26 cardiovascular disease screening by community health workers. *International*  
27 *journal of medical informatics*, 83(9), pp.648-654.
- 28  
29  
30  
31  
32  
33  
34  
35  
36  
37  
38  
39  
40  
41  
42  
43  
44  
45  
46  
47  
48  
49  
50  
51  
52  
53  
54  
55  
56  
57  
58  
59  
60

**Supplementary Material 4: Summary of the included primary studies**

| Primary study     | Country                    | Area                    | Tool           | Methodology                                           | Number of participants / sample (n) <sup>1</sup> |
|-------------------|----------------------------|-------------------------|----------------|-------------------------------------------------------|--------------------------------------------------|
| Alam (2010)       | Bangladesh (urban)         | MCH                     | Custom design  | Case study                                            | 27 CHWs, 6 supervisors                           |
| Andreatta (2011)  | Ghana (rural)              | MCH                     | SMS            | Case study                                            | 8 traditional birth attendants, 2 midwives       |
| Barrington (2010) | Tanzania (rural)           | Malaria                 | SMS            | Pilot study                                           | Health facility workers at 129 rural clinics     |
| Chang (2011)      | Uganda (rural)             | AIDS                    | SMS            | Mixed methods: RCT and qualitative process evaluation | 29 Peer health care workers                      |
| Derenzi (2012)    | Tanzania (rural and urban) | Chronic care (esp. HIV) | CommCare       | Quasi-experimental: multiple experiments and designs  | 87 CHWs<br>n=30                                  |
| Diero (2006)      | Kenya (rural)              | Respiratory             | Palm Pilot PDA | Case study                                            | CHWs, unclear                                    |
| Zurovac (2011)    | Kenya (rural)              | Malaria                 | SMS            | Cluster RCT                                           | 119 CHWs                                         |

<sup>1</sup> Where not explicitly stated to the contrary, the number of intervention participants and the research sample was synonymous.



|    |                     |                            |                                                         |                            |                                               |                                              |
|----|---------------------|----------------------------|---------------------------------------------------------|----------------------------|-----------------------------------------------|----------------------------------------------|
| 1  |                     |                            |                                                         |                            |                                               |                                              |
| 2  |                     |                            |                                                         |                            |                                               |                                              |
| 3  |                     |                            |                                                         |                            |                                               |                                              |
| 4  |                     |                            |                                                         |                            |                                               |                                              |
| 5  | Gisore (2012)       | Kenya (rural)              | MCH                                                     | Phone and weighting scales | Case study                                    | 474 village elders                           |
| 6  |                     |                            |                                                         |                            |                                               |                                              |
| 7  |                     |                            |                                                         |                            |                                               |                                              |
| 8  |                     |                            |                                                         |                            |                                               |                                              |
| 9  | JSI (2013)          | Rwanda (unclear)           | Supply chain Management                                 | Mobile phone               | N/A (grey lit)                                | 371 CHWs                                     |
| 10 |                     |                            |                                                         |                            |                                               |                                              |
| 11 |                     |                            |                                                         |                            |                                               |                                              |
| 12 | Khan (2012)         | Pakistan (urban)           | TB                                                      | Custom design              | Quasi-experimental: retrospective controlled  | Community laypeople as TB screeners, unclear |
| 13 |                     |                            |                                                         |                            |                                               |                                              |
| 14 |                     |                            |                                                         |                            |                                               |                                              |
| 15 |                     |                            |                                                         |                            |                                               |                                              |
| 16 | Lemay (2012)        | Malawi (rural)             | Family planning/reproductive health/ HIV/AIDS knowledge | Frontline SMS              | Mixed methods                                 | 638 CHWs                                     |
| 17 |                     |                            |                                                         |                            |                                               |                                              |
| 18 |                     |                            |                                                         |                            |                                               |                                              |
| 19 |                     |                            |                                                         |                            |                                               |                                              |
| 20 | MacLeod (2012)      | Ghana (rural)              | MCH                                                     | MoTECH                     | Technical evaluation study                    | Community health volunteer, unclear          |
| 21 |                     |                            |                                                         |                            |                                               |                                              |
| 22 |                     |                            |                                                         |                            |                                               |                                              |
| 23 |                     |                            |                                                         |                            |                                               |                                              |
| 24 | Mahmud (2010)       | Malawi (rural)             | Communication                                           |                            | Pilot study                                   | 75 CHWs                                      |
| 25 |                     |                            |                                                         |                            |                                               |                                              |
| 26 |                     |                            |                                                         |                            |                                               |                                              |
| 27 |                     |                            |                                                         |                            |                                               |                                              |
| 28 | Ngabo (2012)        | Rwanda (rural)             | MCH                                                     | RapidSMS                   | Pilot study                                   | 432 CHWs                                     |
| 29 |                     |                            |                                                         |                            |                                               |                                              |
| 30 |                     |                            |                                                         |                            |                                               |                                              |
| 31 | Palazeus (2013)     | Mexico & Guatemala (rural) | Dosing                                                  | CommCare                   | Descriptive survey and qualitative interviews | 17 CHWs                                      |
| 32 |                     |                            |                                                         |                            |                                               |                                              |
| 33 |                     |                            |                                                         |                            |                                               |                                              |
| 34 |                     |                            |                                                         |                            |                                               |                                              |
| 35 | Ramachandran (2010) | India (rural)              | MCH                                                     | Java applet                | Case study                                    | 7 rural health workers                       |
| 36 |                     |                            |                                                         |                            |                                               |                                              |
| 37 |                     |                            |                                                         |                            |                                               |                                              |
| 38 |                     |                            |                                                         |                            |                                               |                                              |
| 39 |                     |                            |                                                         |                            |                                               |                                              |
| 40 |                     |                            |                                                         |                            |                                               |                                              |
| 41 |                     |                            |                                                         |                            |                                               |                                              |
| 42 |                     |                            |                                                         |                            |                                               |                                              |
| 43 |                     |                            |                                                         |                            |                                               |                                              |
| 44 |                     |                            |                                                         |                            |                                               |                                              |
| 45 |                     |                            |                                                         |                            |                                               |                                              |
| 46 |                     |                            |                                                         |                            |                                               |                                              |
| 47 |                     |                            |                                                         |                            |                                               |                                              |

|    |                               |                              |                  |               |                                            |                                              |
|----|-------------------------------|------------------------------|------------------|---------------|--------------------------------------------|----------------------------------------------|
| 1  |                               |                              |                  |               |                                            |                                              |
| 2  |                               |                              |                  |               |                                            |                                              |
| 3  |                               |                              |                  |               |                                            |                                              |
| 4  |                               |                              |                  |               |                                            |                                              |
| 5  | Svoronos (2010)               | Tanzania (rural)             | MCH              | CommCare      | Pilot study                                | 5 CHWs                                       |
| 6  |                               |                              |                  |               |                                            |                                              |
| 7  |                               |                              |                  |               |                                            |                                              |
| 8  | Tomlinson (2009)              | South Africa<br>(peri-urban) | Data collection  | Java applet   | Pilot study                                | 24 CHWs                                      |
| 9  |                               |                              |                  |               |                                            |                                              |
| 10 | Blaschke (2009)               | Malawi (rural)               | Child nutrition  | RapidSMS      | Pilot study                                | Health<br>surveillance<br>assistant, unclear |
| 11 |                               |                              |                  |               |                                            |                                              |
| 12 |                               |                              |                  |               |                                            |                                              |
| 13 |                               |                              |                  |               |                                            |                                              |
| 14 |                               |                              |                  |               |                                            |                                              |
| 15 |                               |                              |                  |               |                                            |                                              |
| 16 | Munro (2014)                  | Liberia (rural)              | MCH              | SMS           | Quasi-experimental:<br>Before/after design | 99 traditional<br>birth attendees            |
| 17 |                               |                              |                  |               |                                            |                                              |
| 18 |                               |                              |                  |               |                                            |                                              |
| 19 |                               |                              |                  |               |                                            |                                              |
| 20 | McNabb (2015)                 | Nigeria (urban)              | MCH (ANC)        | CommCare      | Quasi-experimental<br>Before/after design  | 152 CHWs, 20<br>supervisors                  |
| 21 |                               |                              |                  |               |                                            |                                              |
| 22 |                               |                              |                  |               |                                            |                                              |
| 23 | Martínez-<br>Fernández (2015) | Guatemala<br>(rural)         | Infant mortality | Custom design | Case study                                 | 125 Community<br>facilitators                |
| 24 |                               |                              |                  |               |                                            |                                              |
| 25 |                               |                              |                  |               |                                            |                                              |
| 26 |                               |                              |                  |               |                                            |                                              |
| 27 | Little (2013)                 | Ethiopia (rural)             | Maternal health  | Custom design | Case study                                 | 20 Health<br>extension<br>workers            |
| 28 |                               |                              |                  |               |                                            |                                              |
| 29 |                               |                              |                  |               |                                            |                                              |
| 30 |                               |                              |                  |               |                                            |                                              |
| 31 | Surka (2015)                  | South Africa<br>(urban)      | CVD screening    | CommCare      | Mixed methods pilot<br>study               | 24 CHWs                                      |
| 32 |                               |                              |                  |               |                                            |                                              |
| 33 |                               |                              |                  |               |                                            |                                              |
| 34 |                               |                              |                  |               |                                            |                                              |
| 35 |                               |                              |                  |               |                                            |                                              |
| 36 |                               |                              |                  |               |                                            |                                              |
| 37 |                               |                              |                  |               |                                            |                                              |
| 38 |                               |                              |                  |               |                                            |                                              |
| 39 |                               |                              |                  |               |                                            |                                              |
| 40 |                               |                              |                  |               |                                            |                                              |
| 41 |                               |                              |                  |               |                                            |                                              |
| 42 |                               |                              |                  |               |                                            |                                              |
| 43 |                               |                              |                  |               |                                            |                                              |
| 44 |                               |                              |                  |               |                                            |                                              |
| 45 |                               |                              |                  |               |                                            |                                              |
| 46 |                               |                              |                  |               |                                            |                                              |
| 47 |                               |                              |                  |               |                                            |                                              |

1  
2  
3  
4  
5  
6  
7  
8  
9  
10  
11  
12  
13  
14  
15  
16  
17  
18  
19  
20  
21  
22  
23  
24  
25  
26  
27  
28  
29  
30  
31  
32  
33  
34  
35  
36  
37  
38  
39  
40  
41  
42  
43  
44  
45  
46  
47

**Supplementary Material 5: Categorisation and re-analysis of included studies**

| COLUMN 1          |                                                                                                                                                    |                         | COLUMN 2                                 |                                                                                                                                         |                                                   |                                    | COLUMN 3                                |                     |                      |                                   |
|-------------------|----------------------------------------------------------------------------------------------------------------------------------------------------|-------------------------|------------------------------------------|-----------------------------------------------------------------------------------------------------------------------------------------|---------------------------------------------------|------------------------------------|-----------------------------------------|---------------------|----------------------|-----------------------------------|
| Primary study     | Intervention allocation                                                                                                                            | Agreement in allocation | Reclassification of intervention as WPL? |                                                                                                                                         |                                                   |                                    | Reclassification of intervention as ML? |                     |                      |                                   |
|                   |                                                                                                                                                    |                         | <i>Learning by-product of work</i>       | <i>Learning within work</i>                                                                                                             | <i>Learning for work</i>                          | <i>Reclassification: fits WPL?</i> | <i>Personalisation</i>                  | <i>Authenticity</i> | <i>Collaboration</i> | <i>Reclassification: fits ML?</i> |
| Alam (2010)       | (1) Supervision & monitoring <sup>c</sup> ;<br>(2) Data collection <sup>ab</sup>                                                                   | 2 different allocations | No evidence                              | No evidence                                                                                                                             | No evidence                                       | No                                 | No evidence                             | No evidence         | No evidence          | No                                |
| Andreatta (2011)  | (1) Data collection <sup>b</sup> ;<br>(2) Training & education <sup>ad</sup> ;<br>Training <sup>i</sup> ;<br>(3) Medication adherence <sup>e</sup> | 4 different allocations | No evidence                              | No evidence                                                                                                                             | Training in the use of a data reporting protocol. | No                                 | No evidence                             | No evidence         | No evidence          | No                                |
| Barrington (2010) | (1) Data collection <sup>b</sup> ;<br>(2) Training & education <sup>a</sup> ;<br>(3) Management <sup>e</sup>                                       | 2 different allocations | No evidence                              | No evidence                                                                                                                             | Training in the use of a mobile phone.            | No                                 | No evidence                             | No evidence         | No evidence          | No                                |
| Chang (2011)      | (1) Communication <sup>f</sup> ;<br>(2) Training & education <sup>e</sup> ;<br>(3) Monitoring & compliance <sup>eg,;</sup> ;                       | 4 different allocations | No evidence                              | <ul style="list-style-type: none"> <li>• Asking questions</li> <li>• Getting information</li> <li>• Locating resource people</li> </ul> | No evidence                                       | Secondary                          | No evidence                             | No evidence         | No evidence          | No                                |
| DeRenzi (2012)    | (1) Management <sup>l</sup> ;<br>(2) Communication <sup>ab</sup>                                                                                   | 4 different allocations | No evidence                              | No evidence                                                                                                                             | No evidence                                       | No                                 | No evidence                             | No evidence         | No evidence          | No                                |

1  
2  
3  
4  
5  
6  
7  
8  
9  
10  
11  
12  
13  
14  
15  
16  
17  
18  
19  
20  
21  
22  
23  
24  
25  
26  
27  
28  
29  
30  
31  
32  
33  
34  
35  
36  
37  
38  
39  
40  
41  
42  
43  
44  
45  
46  
47

|                |                                                                                                                            |                                                                                    |             |                                                                                                                         |                        |     |             |                                                     |               |     |
|----------------|----------------------------------------------------------------------------------------------------------------------------|------------------------------------------------------------------------------------|-------------|-------------------------------------------------------------------------------------------------------------------------|------------------------|-----|-------------|-----------------------------------------------------|---------------|-----|
|                |                                                                                                                            | (3) Monitoring & compliance <sup>g</sup><br>(4) Health system support <sup>d</sup> |             |                                                                                                                         |                        |     |             |                                                     |               |     |
| Diero (2006)   | (1) Standards and guidelines <sup>d</sup>                                                                                  | Single review                                                                      | No evidence | No evidence                                                                                                             | No evidence            | No  | No evidence | No evidence                                         | No evidence   | No  |
| Zurovac (2011) | (1) Decision-support <sup>af</sup><br>(2) Monitoring & compliance <sup>edg</sup><br>(3) Training & education <sup>ad</sup> | 3 different allocations                                                            |             | <ul style="list-style-type: none"> <li>• Giving and receiving feedback</li> <li>• Use of mediating artefacts</li> </ul> | Being supervised       | Yes |             | Contextualisation of knowledge in practice contexts |               | Yes |
| Gisore (2012)  | (1) Data collection <sup>f</sup><br>(2) Training & education <sup>d</sup>                                                  | 2 different allocations                                                            | No evidence | No evidence                                                                                                             | Training on tool usage | No  | No evidence | No evidence                                         | No evidence   | No  |
| JSI (2013)     | (1) Supervision <sup>a</sup><br>(2) Communication <sup>a</sup>                                                             | Single review                                                                      | No evidence | No evidence                                                                                                             | No evidence            | No  | No evidence | No evidence                                         | No evidence   | No  |
| Khan (2011)    | (1) Decision-support <sup>f</sup>                                                                                          | Single review                                                                      | No evidence | No evidence                                                                                                             | No evidence            | No  | No evidence | No evidence                                         | No evidence   | No  |
| Lemay (2012)   | (1) Communication <sup>abd</sup>                                                                                           | Agreement                                                                          | No evidence | • Asking questions                                                                                                      | No evidence            | No  | No evidence | No evidence                                         | Communication | No  |
| McLeold (2012) | (1) Supervision <sup>a</sup><br>(2) Communication <sup>a</sup>                                                             | Single review                                                                      | No evidence | No evidence                                                                                                             | No evidence            | No  | No evidence | No evidence                                         | No evidence   | No  |
| Mahmud (2010)  | (1) Training & education <sup>de</sup><br>(2) Communication <sup>af</sup><br>(3) Data collection <sup>a</sup>              | 3 different allocations                                                            | No evidence | No evidence                                                                                                             | Training on tool usage | No  | No evidence | No evidence                                         | No evidence   | No  |
| Ngabo (2012)   | (1) Communication <sup>af</sup><br>(2) Supervision <sup>a</sup><br>(3) Medication                                          | 3 different allocations                                                            | No evidence | No evidence                                                                                                             | Training on tool usage | No  | No evidence | No evidence                                         | Communication | No  |

1  
2  
3  
4  
5  
6  
7  
8  
9  
10  
11  
12  
13  
14  
15  
16  
17  
18  
19  
20  
21  
22  
23  
24  
25  
26  
27  
28  
29  
30  
31  
32  
33  
34  
35  
36  
37  
38  
39  
40  
41  
42  
43  
44  
45  
46  
47

|                           |                                                                                                                                                                                                         | adherence <sup>e</sup>  |                                                                                                                                                      |                                                                                                                     |                                                                                                    |           |                                      |                                            |             |     |
|---------------------------|---------------------------------------------------------------------------------------------------------------------------------------------------------------------------------------------------------|-------------------------|------------------------------------------------------------------------------------------------------------------------------------------------------|---------------------------------------------------------------------------------------------------------------------|----------------------------------------------------------------------------------------------------|-----------|--------------------------------------|--------------------------------------------|-------------|-----|
| Palazuelos (2013)         | (1) Training & education <sup>ai</sup><br>(2) Medicine adherence <sup>ai</sup>                                                                                                                          | Agreement               | No evidence                                                                                                                                          | No evidence                                                                                                         | Training on tool usage                                                                             | No        | No evidence                          | No evidence                                | No evidence | No  |
| Ramachandran (2010)       | (1) Education & training <sup>ad</sup>                                                                                                                                                                  | Agreement               | No evidence                                                                                                                                          | No evidence                                                                                                         | No evidence                                                                                        | No        | No evidence                          | No evidence                                | No evidence | No  |
| Svoronos (2010)           | (1) Training & education <sup>a</sup><br>(2) Decision support <sup>a</sup><br>(3) Monitoring & compliance <sup>d</sup><br>(4) Supervision & management <sup>d</sup><br>(5) Data collection <sup>b</sup> | 5 different allocations | <ul style="list-style-type: none"> <li>Tackling challenging tasks and roles</li> <li>Problem solving</li> <li>Standardisation of practice</li> </ul> | <ul style="list-style-type: none"> <li>Giving and receiving feedback</li> <li>Use of mediating artefacts</li> </ul> | <ul style="list-style-type: none"> <li>Being supervised</li> <li>Training on tool usage</li> </ul> | Yes       | No evidence                          | Contextualised feedback & practice support | No evidence | Yes |
| Tomlinson (2009)          | (1) Supervision and management <sup>ad</sup><br>(2) Communication <sup>a</sup><br>(3) Data collection <sup>ef</sup>                                                                                     | 3 different allocations | No evidence                                                                                                                                          | No evidence                                                                                                         | No evidence                                                                                        | No        | No evidence                          | No evidence                                | No evidence | No  |
| Blaschke (2009)           | (1) Decision-support <sup>f</sup><br>(2) Data collection <sup>g</sup>                                                                                                                                   | 2 different allocations | No evidence                                                                                                                                          | <ul style="list-style-type: none"> <li>Learning from mistakes</li> <li>Giving and receiving feedback</li> </ul>     | <ul style="list-style-type: none"> <li>Being supervised</li> <li>Training on tool usage</li> </ul> | Yes       | No evidence                          | Contextualised feedback & practice support | No evidence | Yes |
| McNabb (2015)             | (1) Decision-support <sup>m</sup><br>(2) Data collection <sup>l</sup>                                                                                                                                   | 2 different allocations | Tool forces practice decisions                                                                                                                       | No evidence                                                                                                         | No evidence                                                                                        | Secondary | No evidence                          | No evidence                                | No evidence | No  |
| Martínez-Fernández (2015) | (1) Decision-support <sup>l</sup><br>(2) Data collection <sup>l</sup><br>(3) Training <sup>l</sup>                                                                                                      | Single review           | No evidence                                                                                                                                          | Consultation and logistical support.                                                                                | Using phones for CPD                                                                               | Yes       | Distance learning using mobile tools |                                            |             | Yes |

|                                           |               |                                                                                         |                         |                                |             |                                                                         |           |             |             |             |    |
|-------------------------------------------|---------------|-----------------------------------------------------------------------------------------|-------------------------|--------------------------------|-------------|-------------------------------------------------------------------------|-----------|-------------|-------------|-------------|----|
| 1<br>2<br>3<br>4<br>5<br>6<br>7<br>8<br>9 | Little (2013) | (1) Data collection <sup>alno</sup><br>(2) Provider-Provider Communication <sup>n</sup> | 2 different allocations | Tool forces practice decisions | No evidence | No evidence                                                             | Secondary | No evidence | No evidence | No evidence | No |
| 10<br>11<br>12<br>13<br>14<br>15<br>16    | Munro (2014)  | (1) Data collection <sup>lo</sup>                                                       | Agreement               |                                |             | Learning to use and implement data collection<br>Training on tool usage | Secondary | No evidence | No evidence | No evidence | No |
| 17<br>18<br>19<br>20                      | Surka (2014)  | (1) Data collection <sup>n</sup>                                                        | Single review           | Tool forces practice decisions | No evidence | Training on tool usage                                                  | Secondary | No evidence | No evidence | No evidence | No |

21 a=Agrawal (2015); b=Chib (2015); c=Goel (2013); d=Braun (2015); e=Aranda-jan (2014); f=Hall (2014); g=Kallander (2014); h=Hurt (2014);  
22 i=O'Donovan; j=Peiris (2014); k=Bloomfield (2014); l=Colaci (2016); m=Adepoju (2017); n=White (2016); o=Amoakoh (2016); q=Tian (2017)

1  
2  
3  
4  
5  
6  
7  
8  
9  
10  
11  
12  
13  
14  
15  
16  
17  
18  
19  
20  
21  
22  
23  
24  
25  
26  
27  
28  
29  
30  
31  
32  
33  
34  
35  
36  
37  
38  
39  
40  
41  
42  
43  
44  
45  
46  
47



Supplementary Material 6

| Theory of learning              | Learning processes                                     | Studies coded to constitute workplace and mobile learning |                 |                 |                           |
|---------------------------------|--------------------------------------------------------|-----------------------------------------------------------|-----------------|-----------------|---------------------------|
|                                 |                                                        | Zurovac (2011)                                            | Svoronos (2010) | Blaschke (2009) | Martinez-Fernandez (2015) |
| <b>Workplace based learning</b> | <b>Work Processes</b><br>with learning as a by-product | Participation in group processes                          |                 |                 |                           |
|                                 |                                                        | Working alongside others                                  |                 |                 |                           |
|                                 |                                                        | Consultation                                              |                 |                 | YES                       |
|                                 |                                                        | Tackling challenging tasks and roles                      |                 |                 |                           |
|                                 |                                                        | Problem solving                                           |                 |                 |                           |
|                                 |                                                        | Trying things out                                         |                 |                 |                           |
|                                 |                                                        | Consolidating, extending and refining skills              | YES             |                 | YES                       |
|                                 |                                                        | Working with                                              |                 |                 | YES                       |

1  
2  
3  
4  
5  
6  
7  
8  
9  
10  
11  
12  
13  
14  
15  
16  
17  
18  
19  
20  
21  
22  
23  
24  
25  
26  
27  
28  
29  
30  
31  
32  
33  
34  
35  
36  
37  
38  
39  
40  
41  
42  
43  
44  
45  
46  
47

1  
2  
3  
4  
5  
6  
7  
8  
9  
10  
11  
12  
13  
14  
15  
16  
17  
18  
19  
20  
21  
22  
23  
24  
25  
26  
27  
28  
29  
30  
31  
32  
33  
34  
35  
36  
37  
38  
39  
40  
41  
42  
43  
44  
45  
46  
47

|  |                                                                      |                               |     |                                          |     |     |
|--|----------------------------------------------------------------------|-------------------------------|-----|------------------------------------------|-----|-----|
|  |                                                                      | clients                       |     |                                          |     |     |
|  | Learning Activities located <b>within</b> work or learning processes | Asking questions              |     |                                          |     |     |
|  |                                                                      | Getting information           | YES | YES                                      | YES | YES |
|  |                                                                      | Locating resource people      |     |                                          |     | YES |
|  |                                                                      | Listening & observing         |     |                                          |     |     |
|  |                                                                      | Reflecting                    |     |                                          |     |     |
|  |                                                                      | Learning from mistakes        |     |                                          |     |     |
|  |                                                                      | Giving and receiving feedback |     |                                          |     |     |
|  |                                                                      | Use of mediating artefacts    |     |                                          |     |     |
|  | Learning Processes at or near the workplace                          | Being supervised              |     | YES (see our previous table for details) |     | YES |
|  |                                                                      | Being coached                 |     |                                          |     | YES |

1  
2  
3  
4  
5  
6  
7  
8  
9  
10  
11  
12  
13  
14  
15  
16  
17  
18  
19  
20  
21  
22  
23  
24  
25  
26  
27  
28  
29  
30  
31  
32  
33  
34  
35  
36  
37  
38  
39  
40  
41  
42  
43  
44  
45  
46  
47

|                        |                 |                             |                                                                                          |                                  |                                    |                                       |
|------------------------|-----------------|-----------------------------|------------------------------------------------------------------------------------------|----------------------------------|------------------------------------|---------------------------------------|
|                        |                 | Being mentored              |                                                                                          |                                  |                                    |                                       |
|                        |                 | Shadowing                   |                                                                                          |                                  |                                    |                                       |
|                        |                 | Visiting other sites        |                                                                                          |                                  |                                    |                                       |
|                        |                 | Conferences                 |                                                                                          |                                  |                                    |                                       |
|                        |                 | Short courses               |                                                                                          |                                  |                                    | YES                                   |
|                        |                 | Working for a qualification |                                                                                          |                                  |                                    |                                       |
|                        |                 | Independent study           |                                                                                          |                                  |                                    |                                       |
|                        |                 |                             |                                                                                          |                                  |                                    |                                       |
| <b>Mobile learning</b> | Personalisation | Agency                      | Medium: improved participants' ability to treat                                          | Low: re-enforce target behaviour |                                    | High: able to call for help as needed |
|                        |                 | Customisation               |                                                                                          |                                  |                                    |                                       |
|                        | Authenticity    | Situatedness                | High: messages received at work (but in the linked paper noted that it was not linked to | High: phones used at work        | Medium: feedback loops for the HSA | High: phones used at work             |

1  
2  
3  
4  
5  
6  
7  
8  
9  
10  
11  
12  
13  
14  
15  
16  
17  
18  
19  
20  
21  
22  
23  
24  
25  
26  
27  
28  
29  
30  
31  
32  
33  
34  
35  
36  
37  
38  
39  
40  
41  
42  
43  
44  
45  
46  
47

|  |               |                   |           |  |  |                              |
|--|---------------|-------------------|-----------|--|--|------------------------------|
|  |               |                   | training) |  |  |                              |
|  |               | Contextualisation |           |  |  |                              |
|  | Collaboration | Data sharing      |           |  |  |                              |
|  |               | Conversation      |           |  |  | High: based on communication |

# BMJ Open

## **A scoping review assessing the evidence used to support the adoption of mobile health (mHealth) technologies for the education and training of community health workers (CHWs) in low- and middle-income countries**

|                                 |                                                                                                                                                                              |
|---------------------------------|------------------------------------------------------------------------------------------------------------------------------------------------------------------------------|
| Journal:                        | <i>BMJ Open</i>                                                                                                                                                              |
| Manuscript ID                   | bmjopen-2017-019827.R1                                                                                                                                                       |
| Article Type:                   | Research                                                                                                                                                                     |
| Date Submitted by the Author:   | 03-May-2018                                                                                                                                                                  |
| Complete List of Authors:       | Winters, Niall; University of Oxford, Education<br>Langer, Laurenz; University of Johannesburg, Africa Centre for Evidence<br>Geniets, Anne; University of Oxford, Education |
| <b>Primary Subject Heading</b>: | Global health                                                                                                                                                                |
| Secondary Subject Heading:      | Medical education and training                                                                                                                                               |
| Keywords:                       | mHealth, Community Health Worker, Education and Training, Scoping Review, Global Health                                                                                      |
|                                 |                                                                                                                                                                              |

SCHOLARONE™  
Manuscripts

1 **A scoping review assessing the evidence used to support the adoption of mobile**  
2 **health (mHealth) technologies for the education and training of community health**  
3 **workers (CHWs) in low- and middle-income countries**  
4

5  
6 **Niall Winters** (*Corresponding author*)

7 Department of Education, University of Oxford  
8 15 Norham Gardens  
9 Oxford OX2 6PY  
10 UK  
11

12 Email: [niall.winters@education.ox.ac.uk](mailto:niall.winters@education.ox.ac.uk)

13 Tel.: +44 1865 274 007

14 Fax.: +44 1865 274 027  
15

16  
17 **Laurenz Langer**, University of Johannesburg, Johannesburg, South Africa  
18

19 **Anne Geniets**, University of Oxford, Oxford, UK  
20

21 **Contributor Statement:** Activities undertaken by the authors were as  
22 follows: Establishment of research question/s and development of search strategy: NW  
23 and LL. Background framing: NW & AG. Database search and record screening: LL.  
24 Extraction of primary studies from the included reviews: LL and NW. Recoding: NW and  
25 LL. Discussion & Conclusion: NW, LL and AG.  
26  
27  
28  
29

30 **KEYWORDS:** mHealth, Global Health, Community Health Worker, Education and  
31 Training, Scoping Review  
32

33 **Word count:** 5,293  
34  
35  
36  
37  
38  
39  
40  
41  
42  
43  
44  
45  
46  
47  
48  
49  
50  
51  
52  
53  
54  
55  
56  
57  
58  
59  
60



## ABSTRACT

### Objectives

Undertake a systematic scoping review to determine how a research evidence base, in the form of existing systematic reviews in the field of mobile health (mHealth), constitutes education and training for community health workers who use mobile technologies in everyday work. The review was informed by the following research questions: Does educational theory inform the design of the education and training component of mHealth interventions? How is education and training with mobile technology by CHWs in low- and middle-income countries categorised by existing systematic reviews? What is the basis for this categorisation?

### Setting

The review explored the literature from 2000 to 2017 to investigate how mHealth interventions have been positioned within the available evidence base in relation to their use of formal theories of learning.

### Results

The scoping review found 24 primary studies that were categorised by 16 systematic reviews as supporting CHWs' education and training using mobile technologies. However, when formal theories of learning from educational research were used to re-categorise these 24 primary studies, only four could be coded as such. This identifies a problem with how CHWs' education and training using mobile technologies is understood and categorised within the existing evidence base. This is because there is no agreed upon, theoretically informed understanding of what counts as learning.

### Conclusion

The claims made by mHealth researchers and practitioners regarding the learning benefits of mobile technology are not based on research results that are underpinned by formal theories of learning. mHealth suffers from a reductionist view of learning that underestimates the complexities of the relationship between pedagogy and technology. This has resulted in miscategorisations of what constitutes CHWs' education and training within the existing evidence base. This can be overcome by informed collaboration between the health and education communities.

### Strengths and limitations of this study

- The study applied an innovative three-step scoping review methodology to unpack the evidence on mobile technology's contribution to the education and training of CHWs.
- In-depth primary analysis determined if theories of learning were used to conceptualise and categorise education and training in mHealth.
- The study details if these theories were used to design and implement the education and training component of mHealth interventions for CHWs.
- The in-depth primary analysis of theories of learning is limited to programmatic information reported in the identified primary studies.

- The review is limited to papers included in systematic reviews published in English between 2000-2017.

## INTRODUCTION

The popularity of mobile phones in low- and middle-income countries (LMICs) has motivated their use in healthcare, particularly as a tool to support primary health care outreach by community health workers (CHWs) to those with little or no access to health care. CHWs usually receive limited but focused training on key health priorities in LMICs and they play a vital role in supporting communities to better engage with the formal health system. While the precise scope of their role differs across LMICs (Oliver et al. discuss their role in Kenya<sup>1</sup>), they have become a vital part of strategies to address weaknesses in health systems. Mobile technology is increasingly viewed as essential to the work of CHWs.

The field of mobile health (mHealth) investigates the role mobile technologies can play in healthcare. mHealth has many functionalities,<sup>2-3</sup> one of which is to provide education and training for CHWs. Delivering individual access to educational material is the primary means of achieving this,<sup>4</sup> particularly in contexts where face-to-face training is limited. Yet, such information dissemination models of education are well known to miss the wider social and cultural aspects of learning inherent to healthcare practice,<sup>5</sup> and more relevant educational theories, including inquiry learning, experiential learning and situated learning, are used in other areas of healthcare practice.<sup>6-8</sup>

Educational researchers have built on these foundational theories to develop concepts of workplace-based learning and mobile learning,<sup>9,10</sup> which are designed to support learners to produce new knowledge using technology while working. However, it is unclear if or how workplace-based learning and mobile learning research has been incorporated into mHealth platforms. Preliminary indicators suggest that almost all 'education theory' is ignored. For example, in Labrique et al.'s widely regarded mHealth framework,<sup>11</sup> none of the example interventions in the category 'provider training and education' (p. 164) are informed by formal theories of workplace-based or mobile learning. Other categories, such as 'electronic decision-support' could be considered workplace-based learning. The problem is further complicated by the fact that in two systematic reviews of mHealth interventions,<sup>3,12</sup> the same underlying mechanisms of information dissemination and increased communication are applied to two very different challenges: (a) patient education for behaviour change and (b) CHWs' continuous professional development. Yet, from an educational perspective, it is challenging to equate mHealth interventions that provide health-related information with interventions trying to change CHW's practice and support professional development; the underlying pedagogical mechanisms required for both types of interventions differ significantly in nature and scale.

Consequently, there is a pressing need to understand: 1) If and how educational theories are being incorporated into mHealth platforms currently? 2) How the adoption of a novel educational lens can inform the future development of mHealth technology for use by CHWs?

While multiple reviews of mHealth in LMICs have recently been published, this systematic scoping review is the first to combine theories of workplace-based learning and mobile learning and apply them to mHealth research on education and training for CHWs in LMICs. The focus of the review is not on measurable endpoints of education and training

1 but rather on how the educational components have been conceptualised within existing  
2 mHealth research.  
3  
4  
5

## 6 **METHODS**

### 7 *Review approach:*

8 We conducted a systematic scoping review of the research evidence on the use of mobile  
9 technologies to facilitate CHWs' education and training in LMICs. A scoping review is  
10 defined<sup>13</sup> as "a form of knowledge synthesis that addresses an exploratory research  
11 question aimed at mapping key concepts, types of evidence, and gaps in research related  
12 to a defined area or field by systematically searching, selecting, and synthesizing existing  
13 knowledge" (p. 1292). Scoping reviews are part of the family of research synthesis  
14 methods, but compared to systematic reviews address broader research questions. They  
15 aim to provide an overview and organisation of existing knowledge rather than a narrow  
16 synthesis of a predefined research question.<sup>14-15</sup> Usually, this different synthesis approach  
17 is conducted over a shorter timeframe than systematic reviews, using more targeted  
18 search terms and focuses less on the critical appraisal of the included evidence.  
19  
20

21 A scoping review approach was chosen for this study because we wanted to explore how  
22 existing literature has conceptualised and operationalised the use of mobile technologies  
23 to support CHWs' learning practices. The focus is on the diversity of understandings and  
24 definitions of CHWs' education and training in the existing literature and what patterns and  
25 gaps might emerge from a systematic analysis of this body of knowledge<sup>i</sup>. In order to  
26 capture the conceptualisation and positioning of mHealth interventions that have an  
27 education or training component, our scoping review targeted existing systematic reviews  
28 of mHealth interventions rather than primary studies as a first level of analysis. Unlike  
29 primary studies, these reviews require an explicit conceptual framework—including  
30 Labrique's framework—in order to group mHealth interventions for analysis. Consequently,  
31 we can derive the positioning and categorisation of different mHealth interventions with  
32 respect to their support for CHWs' education and training from these systematic reviews.  
33  
34

35 Our scoping review followed explicit and transparent research steps to explore the  
36 research evidence on mHealth and CHWs' education and training. A review protocol was  
37 not published and the study was not registered with PROSPERO, as these mechanisms  
38 are not applied to scoping reviews.<sup>13-14</sup>  
39  
40

41 We followed a novel three-step approach in our scoping review that combined secondary  
42 research methods with a primary re-analysis of the included studies. In the first step,  
43 existing systematic reviews investigating CHWs' education and training when using mobile  
44 technologies were sought. As outlined above, this novel approach was necessary to allow  
45 us to investigate how different mHealth interventions were categorised in relation to  
46 education and training within the evidence base. In the second step, we then extracted the  
47 primary studies included in these reviews in order to provide a descriptive account of the  
48 included mHealth interventions and the wider characteristics of the evidence base. In the  
49 third step, we conducted a primary re-analysis of the included mHealth interventions,  
50 which were recoded with respect to their education or training component. That is, we  
51 used two coding frameworks inspired by different theories of learning—workplace-based  
52 learning and mobile learning.<sup>9,10</sup> These two theories of were selected because they are  
53 both well-developed, proven and have been applied in multiple projects in the education  
54  
55

---

56 <sup>i</sup> We were not concerned with whether mobile technologies are effective in increasing learning outcomes or how  
57 CHWs perceive the use of mobile technologies. These types of research questions lend themselves to full systematic  
58 reviews.  
59

1 literature. Each builds on over a decade of research, and draws together key conceptual  
2 points into practically applicable frameworks.  
3

4  
5 The chosen coding frameworks were then applied to the primary studies included in the  
6 systematic review. As a result, we obtained two different set of results on how mHealth  
7 interventions were categorised regarding their support for CHWs' education and training:  
8 (i) the categorisation of interventions in the systematic reviews themselves and (ii) our re-  
9 categorisation of the same interventions using explicit learning from educational research.  
10 These two sets of categorisations allowed us to juxtapose the prevailing positioning and  
11 understanding of education and training in mHealth with a more pedagogically grounded  
12 understanding. A more traditional review approach, without this re-analysis of primary  
13 studies, would not have allowed us to juxtapose these different understandings. The same  
14 applies had we followed a systematic review approach that only included primary studies  
15 and not the existing reviews themselves. We elaborate on the methods employed in each  
16 step below.  
17

### 18 **Step 1: Review of existing systematic reviews**

#### 19 *Search methods:*

20  
21 We designed an exhaustive and sensitive search strategy to identify all relevant reviews of  
22 mHealth interventions that included CHWs' education and training facilitated by mobile  
23 technologies in LMICs. The search strategy was deliberately designed to be over-  
24 inclusive. Search terms were formulated to identify any mHealth review covering LMICs  
25 and we manually filtered down the reviews relevant to CHWs' education and training.  
26 Likewise, despite being focused on CHWs in our review, our search strategy did not  
27 specify terms related to CHWs. Both decisions ensured that no relevant reviews were  
28 excluded during the search. The full search terms therefore only included key words for  
29 the concepts 'mHealth', 'systematic review', and 'LMICs'. Concepts were combined using  
30 the AND boolean operator to develop a master search string (Supplementary Material 1).  
31  
32

33  
34 The full search string was then applied to a range of academic databases in the health and  
35 social sciences: CINAHL; Pubmed; Medline; PsychInfo; ERIC; Education Full-text; and ISI  
36 web of science. Database searches covered the period 2000 to 2017. The year 2000 as a  
37 cut-off date was chosen as mobile technologies did not see widespread application to  
38 support health care in LMICs before then. In addition, we also searched the Grey literature  
39 for reviews relevant for inclusion. Grey literature sources included Google and Google  
40 Scholar searches as well as specialized systematic review databases, i.e. Cochrane  
41 Library of Systematic Reviews, Campbell Library, and the 3ie database of international  
42 development reviews. Lastly, reference lists of included reviews were used as an  
43 additional source for snowball searching for additional reviews. A full record of the  
44 conducted search is provided in Supplementary Material 2.  
45  
46

#### 47 *Inclusion criteria:*

48 We formulated explicit inclusion criteria that determined what reviews were eligible for  
49 inclusion in our scoping review. Conceptually, this referred to existing systematic reviews  
50 of mHealth interventions that support CHWs' education and training in LMICs. To  
51 operationalise this into transparent inclusion criteria, the following definitions were applied.  
52

53 Population: CHWs were defined broadly in line with the WHO's 2007 definition of lay  
54 health workers as applied in Lewin et al.<sup>16</sup>:  
55  
56  
57  
58  
59  
60

1  
2 “Community health workers should be members of the communities where they work,  
3 should be selected by the communities, should be answerable to the communities for  
4 their activities, should be supported by the health system but not necessarily a part of  
5 its organization, and have shorter training than professional workers.” (p.3)  
6

7 This definition allows for different types of health care workers to be classified as CHWs in  
8 different contexts. Reviews were included as long as they covered mHealth interventions  
9 applied by or for CHWs regardless of whether CHWs were the main focus of the review.  
10 LMICs were defined using the World Bank classification of economies.<sup>17</sup> To be included,  
11 reviews had to focus on LMICs and for reviews that had no regional scope, at least 50 per  
12 cent of the included studies had to be from LMICs in order for the review to be featured in  
13 our scoping review.  
14

15 Intervention: Reviews had to include mHealth interventions that used mobile technology to  
16 facilitate CHWs’ education and training. This excludes reviews that focus on fixed ICT  
17 infrastructure such as desktop PCs and fixed diagnostic ICTs only. Education and training  
18 was defined broadly and we followed the reviews’ positioning of interventions as to how  
19 they facilitated learning. In addition, we included the following categories used in reviews  
20 based on Labrique et al’s framework to ensure no relevant interventions were missed:  
21 Decision-support; provider-provider communication; provider work planning and  
22 scheduling; data collection and reporting. A systematic review covering any of the above  
23 categories was thus included in our scoping review. This was because each of these  
24 categories could potentially be framed as supporting the CHWs’ education and training  
25 using conceptualisations of workplace-based learning and mobile learning. For example,  
26 improved communication between CHWs could support collaboration and social learning.  
27 Likewise, following explicit decision-making algorithms could lead to the learning and  
28 acquisition of new and improved practices by CHWs. Both ‘provider work planning and  
29 scheduling’ and ‘data collection and reporting’ can offer CHWs with opportunities for  
30 reflective practice, for example by providing insights into the relationship between data  
31 capture and decision-making. Reviewing cohort data could offer supervisors the  
32 opportunity to support peer learning. Again, we aimed to be over-inclusive at this stage so  
33 as not to miss any relevant reviews.  
34  
35  
36

37 Research design: To be included, studies had to qualify as a ‘systematic review’ which  
38 was defined broadly for this scoping review. Any type of research synthesis was included  
39 as long as a structured and transparent review approach was applied. Indicators of a  
40 structured review approach referred to: reporting of (i) a systematic search; (ii) pre-defined  
41 inclusion criteria; and (iii) a stated method of synthesis. Indicators of a transparent review  
42 approach referred to: reporting of (i) numbers of searched and included studies; (ii) a  
43 summary table of included studies; and (iii) a discussion of the strengths of the evidence in  
44 the synthesis.  
45  
46

47 Outcomes: No studies were excluded on the basis of measured outcomes or applied  
48 outcome measures because intervention effectiveness was not of concern in this scoping  
49 review.  
50

#### 51 *Screening and coding of reviews:*

52 Two reviewers screened all search hits for potentially relevant systematic reviews at title  
53 and abstract. Full-texts of potentially relevant reviews were then sought and screened  
54 again against our inclusion criteria. A sub-set of 10 per cent of the citations eligible of full-  
55 text screening were double-screened to assess inter-reviewer reliability. Disagreements  
56 between reviewers were resolved by joint discussion with a third reviewer acting as an  
57  
58  
59



1 arbitrator. Following the screening, included systematic reviews were then coded for two  
2 high-level characteristics: (i) applied framework to categorise interventions and (ii) included  
3 mHealth interventions.  
4

#### 5 *Critical appraisal:*

6 As this is a scoping review, no critical appraisal of either included reviews or primary  
7 studies was conducted.  
8  
9

### 10 **Step 2: Extraction of primary studies from the included reviews**

#### 11 *Identification of primary studies:*

12 Having identified eligible reviews, we then extracted the primary studies included in each  
13 review for further analysis. That is, the included systematic reviews served as the data  
14 source for primary studies. We only searched the relevant systematic reviews under the  
15 intervention categories that could potentially relate to education and training. Extracting  
16 only primary studies that existing systematic reviews had coded and categorised as  
17 related to education and training allows us to unpack and examine this positioning.  
18  
19  
20

21 We did not conduct an independent scientific search for relevant primary studies in  
22 addition to the search for systematic reviews. Including primary studies that were not found  
23 in existing systematic reviews would not have revealed any new information regarding how  
24 the primary studies were categorised. As a result, primary studies of mHealth interventions  
25 and CHWs that were not included in any of the systematic reviews were excluded from our  
26 scoping review. In practice, this refers mainly to primary studies published after the  
27 included systematic reviews were conducted. (Searches for the two most up-to-date  
28 systematic reviews<sup>18-19</sup> included in our scoping review were completed in December 2015.)  
29  
30

#### 31 *Inclusion criteria for primary studies:*

32 In terms of population, intervention, and outcome the inclusion criteria of the primary  
33 studies were identical to the criteria for systematic reviews. In terms of study design,  
34 however, primary studies could be of any empirical research design that investigated an  
35 applied mHealth intervention. This included both quantitative and qualitative research  
36 designs but excluded designs that assessed interventions in a lab setting and/or assessed  
37 perceptions and feasibility of a future intervention implementation.<sup>20,21</sup>  
38  
39

#### 40 *Screening and coding of primary studies:*

41 All primary studies allocated to the eligible intervention categories explained above were  
42 screened at full-text by two reviewers. The same quality assurance processes as used for  
43 the screening of the systematic reviews were implemented. We designed an explicit  
44 coding tool to capture key characteristics related to the type of CHWs, the type of mHealth  
45 intervention and technology applied, the context in which it was applied, as well as the  
46 educational event or process facilitated by the technology.  
47

### 48 **Step 3: Primary analysis of study's categorisation as supporting the education and 49 training of CHWs**

50 Two well-established coding frameworks from educational research feature the key  
51 pedagogical attributes of workplace-based and mobile learning: Eraut and Hirsh<sup>9</sup> for  
52 workplace-based learning and Kearney et al.<sup>10</sup> for mobile learning. Applying these two  
53 frameworks as our coding tool allowed us to re-code the primary studies in order to  
54 investigate whether their claim to facilitate CHWs' education and training did hold true from  
55 a pedagogical perspective. In this last step, we thus can compare the outcomes of this  
56 pedagogically-informed coding tool with the reported codes in the reviews. Again, two  
57  
58  
59  
60



1 independent reviewers applied the coding tool with a third reviewer acting as an arbitrator  
2 in case of disagreement.  
3

#### 4 *Review limitations*

5 There are three key limitations to this review. First, only English-language articles were  
6 considered for inclusion. Second, systematic reviews published up to 2017 only cover  
7 primary studies published up to 2015. Studies published after this date were not identified  
8 by the systematic reviews and by extension are not covered by our scoping review. In  
9 general, relying on systematic reviews as an identification strategy entails the risk that our  
10 review is subject to a limitation in scope because we can only re-produce the scope of the  
11 included systematic reviews in our own review<sup>ii</sup>. Third, only a partial range of grey  
12 literature was searched and mHealth conferences were not covered.  
13  
14

#### 15 *Patient and Public Involvement*

16 Patients or the public were not involved in this research.  
17  
18  
19

## 20 **FINDINGS**

### 21 *Search results:*

22 Searches were run between March and May 2016 and updated in June 2017. They  
23 yielded a total of 5,379 citations from twelve different sources (Figure 1). After screening  
24 these citations on title and abstract, the large majority of citations were not relevant  
25 (n=5,281)—a result of our deliberately over-inclusive search strategy. We identified 98  
26 existing reviews that on title and abstract met our inclusion criteria. Full-texts of these  
27 reviews were then sought and reviews screened for inclusion in more detail. This in-depth  
28 screening excluded a further 82 reviews leaving only 16 reviews that met the predefined  
29 inclusion criteria. Reasons for exclusion at full-text screening referred to: reviews not  
30 including studies from LMICs (n=33); not including studies that focus on CHWs as a  
31 population (n=22); not classified as following a structured and transparent review method  
32 (n=13); not including studies that focus on mobile technologies to facilitate training and  
33 learning (n=12); and, not including studies that focus on mobile technologies (n=2). As a  
34 result, we were left with 16 reviews that included research evidence on the application of  
35 mobile technologies to facilitate CHWs' education and training in LMICs.  
36  
37  
38

39 In a second step, we then extracted the primary studies included in the 16 systematic  
40 reviews. We only extracted primary studies that were coded in the reviews to fit  
41 intervention categories associated with CHWs' education and training. As explained  
42 above, this referred to: provider training and education; decision-support; provider-provider  
43 communication; provider work planning and scheduling; data collection and reporting.  
44 Controlling for duplicates, we identified 24 studies that were included in the systematic  
45 reviews. Supplementary Material 3 provides a list of all systematic reviews and primary  
46 studies that were included in our scoping review.  
47  
48  
49

50 [Figure 1 goes approximately here.]  
51  
52  
53  
54  
55

---

56  
57 <sup>ii</sup> However, this limitation is mitigated by the large number of identified systematic reviews (n=16), which provide  
58 large depth and breadth in the scope of included systematic reviews and thus in our own scoping review.  
59

### *Description of mHealth interventions: how did they facilitate CHWs' education and training?*

We extracted descriptive information from all 24 included primary studies using a structured coding tool. A summary table of the extracted data per study is presented in Supplementary Material 4. Of the 24 primary studies extracted from the 16 systematic reviews, three were undertaken in Kenya, three in Malawi, three in Tanzania, two in Ghana, two in Rwanda, and two in South Africa. One study was undertaken in: Bangladesh, Ethiopia, Guatemala, Nigeria, Liberia, Uganda, India and Pakistan respectively. One study was conducted in multiple countries (Mexico and Guatemala). Seventeen studies were undertaken in a rural setting, one in both urban and rural, one peri-urban, and four urban, with one setting undetermined. SMS was used in eight of the studies (including RapidSMS and FrontlineSMS), CommCare in five studies, MoTECH in one, Java Applets in three, customised designs in three, and standard voice calls in two. One tool was undetermined and one used a Palm Pilot PDA.

Intervention participants were described as CHWs in 13 studies while two studies referred to traditional birth attendants. In nine studies, different terms were used to describe health care workers fitting the above definition of CHWs. Examples of these include: village elders, community health volunteer, health surveillance assistant, and accredited social health activist. The number of CHWs involved in the mHealth interventions ranged from 5 to 638 with a median of 75. Only seven studies reached more than 100 CHWs. In all but one study,<sup>22</sup> the CHWs involved in the mHealth intervention were synonymous with the research sample.

The 24 studies included in the 16 systematic reviews reported a range of mHealth interventions that were positioned to facilitate CHWs' education and training. Of the 24 extracted primary studies, a majority were grouped by the systematic reviews to provide direct training and education to CHWs (n=16) (Figure 2). This could refer, for example, to using mobiles to facilitate continued professional development (CPD). A similar number of studies used mobile devices to enhance the communication between CHWs as well as with their supervisors (n=14). For instance, through use of SMS feedback and rapid response services in order to enhance CHWs' access to information and support learning. Other common intervention categories referred to the application of mobiles to train CHWs to collect and manage medical data (n=13); the use of technology-supported decision-making tools (n=11); and the facilitation of supervision of CHWs (n=8).

### *Methodological approaches*

A variety of methodological approaches with a range of research methods and designs were used: case study (n=7), pilot study (n=6), mixed methods (n=4), quasi-experimental designs (n=4). There were only two RCTs and one technical evaluation, and one study where the methods used could not be determined.

### *Discrepancies in categorisation*

1  
2  
3 The same studies reported by different reviews were not consistently categorised in  
4 their relation to CHWs' education and training. For example, a study that reported on  
5 mobile phone text-message reminders to support Kenyan health workers' adherence  
6 to malaria treatment guidelines,<sup>23</sup> was included in five reviews but was alternatively  
7 categorised as a decision-support tool, a monitoring and compliance device, or as a  
8 training and education intervention (Supplementary Material 5). This pattern  
9 characterises the entire sample, where there is a large overlap between the primary  
10 studies included in the systematic reviews, but little overlap in their allocation to  
11 intervention categories. On average, each primary study is allocated to three  
12 different intervention categories across different or within reviews. Of the primary  
13 studies allocated to multiple categories (n=14), only four studies are consistently  
14 allocated to the same intervention category across reviews (see Supplementary  
15 Material 5, column 1). As a result, there seems to be little agreement between  
16 reviews regarding what type of interventions can directly facilitate CHWs' education  
17 and training and how such learning can be defined.  
18

19  
20 This is not surprising given that the challenges of categorisation are well known.<sup>24</sup>  
21 However, given the large variance in the allocation of interventions, there is a need  
22 for mHealth researchers to develop a clearer understanding of what counts as  
23 education and training for CHWs. To overcome the seemingly *ad hoc* manner of  
24 categorisation, we used educational research to develop a refined coding tool (see  
25 Supplementary Material 5 and 6) This tool is based on pedagogical frameworks for  
26 workplace and mobile learning,<sup>9,10</sup> and is applied to assess the exact nature of  
27 education and training that was supported by the mHealth interventions.  
28

29  
30 [Figure 2 goes approximately here.]  
31

### 32 33 *Recoding of mHealth interventions using educational frameworks*

34  
35 The results of our re-analysis of the included primary studies and whether the  
36 reported mHealth interventions could indeed be positioned to facilitate CHWs'  
37 education and training through the use of mobiles are presented in Supplementary  
38 Material 5.  
39

40  
41 In Supplementary Material 5, columns 2 and 3 show the findings of our recoding of  
42 whether the interventions can be classified as workplace learning (column 2) or  
43 mobile learning (column 3). The key criterion to determine if an intervention supports  
44 practice-based mobile learning was that at least one aspect of workplace-based  
45 learning *and* one aspect of mobile learning were addressed (see Supplementary  
46 Material 6 for the coding tool). From recoding the primary studies using the  
47 educational frameworks, we find that only four mHealth interventions<sup>23, 25-27</sup> could be  
48 positioned as facilitating CHWs' education and training through the use of mobile  
49 technology. That is, of the 24 studies that are allocated in the systematic reviews to  
50 categories associated with a potential educational use of technology, the allocation  
51 of 20 studies cannot be confirmed from a pedagogic perspective. The only four  
52 studies where the allocation can be confirmed are highlighted in green in  
53 Supplementary Material 5.  
54

## 55 56 **Discussion**

1  
2  
3 Of the four studies that remained after recoding,<sup>23, 25-27</sup> all exhibited elements of  
4 workplace-based and mobile learning (see Supplementary Material 6). However, the  
5 ways in which these elements were implemented was weak from an educational  
6 research perspective. The need to produce evidence on how mobile technology can  
7 support reflective and interactive forms of CHWs' education and training, particularly  
8 coaching, supervision and mentoring, remain critically neglected overall. mHealth  
9 interventions are not building effectively enough on previous global health  
10 research,<sup>28</sup> which has evidenced how good quality supervision "is one the key  
11 approaches to improving the quality of health care" (p.3). This is particularly true  
12 when it is backed up by regular support and feedback.<sup>29-34</sup>  
13

14  
15 Instead, priority seemed to be given to easily scalable basic technologies that use an  
16 information dissemination model of learning to ensure CHW adherence to  
17 standardised practice (e.g. simplified guidelines on protocols sent via text  
18 messages). Learner agency was not a core priority. In three out of the four  
19 studies,<sup>23,25,26</sup> agency was trumped by the need for CHWs to be held accountable to  
20 managerial oversight. Simplistic approaches, which focus on measuring the volume  
21 of information that CHWs are exposed to as a proxy for education and training have  
22 their limitations. It is unclear how they can empower CHWs, and there is a danger  
23 that the drive for improved efficiency through mobile technology could have the  
24 adverse effect of deprofessionalisation,<sup>35</sup> potentially leading to a weakening of  
25 community-based health structures in the longer term. Instead, mHealth training  
26 interventions need to be seen as part of a wider learning health systems approach<sup>36</sup>  
27 to support the training of CHWs, and as such cannot be considered in isolation.  
28

29  
30 Decision-support tools offer a means by which to generate insights into CHW  
31 practice and could be used as a medium to improve learning. However, the ways in  
32 which this could be implemented were not explored in detail. Svoronos et al.<sup>26</sup> chose  
33 to focus on the details of system implementation. While in Blaschke et al.,<sup>25</sup> CHWs  
34 "stated that they felt empowered" (p. 24) by the automatic provision of a patient's  
35 weight for height calculation, but how this impacted on changes in practice through  
36 improved learning was not provided.  
37

38  
39 Instead of focusing on the developmental needs of CHWs, mHealth interventions in  
40 the main concentrate on providing CHWs with tools to support activities for which  
41 they may not know the wider significance due to lack of training. Jones et al.<sup>37</sup> (the  
42 qualitative evaluation of the Zurovac et al.<sup>23</sup> RCT) are open in the weaknesses of this  
43 aspect of their work: "it was clear that many of the participants believed that the type  
44 of training they received did not provide them with an adequate understanding of the  
45 importance of the new knowledge, or of the positive outcomes that a change in  
46 practice could bring" (p.4). They also noted that "few participants mentioned the  
47 messages in terms of 'support supervision', rather that they were made to feel  
48 somewhat guilty for not employing proper practice".<sup>37</sup> This is not surprising as using  
49 mobile technology for such a nuanced task as supportive supervision is challenging.  
50 Our previous work has demonstrated how CHWs and their supervisors used mobile  
51 messaging platforms (e.g. Whatsapp) to engage in virtual one-to-one, group, and  
52 peer-to-peer forms of supportive supervision.<sup>38</sup> Additional research is needed to  
53 investigate how technology can be embedded within successful supportive  
54 supervisory systems.  
55  
56  
57  
58  
59

The one study that matched most closely what is known about mobile and workplace learning was Martínez-Fernández et al.<sup>28</sup> In this study, mobile phones were used by 125 CHWs “to make consultations regarding issues about which they are unsure; send full epidemiological and clinical information related to the cases they attend; receive continuous training, and perform community health promotion and prevention activities through distance learning sessions” (p. 284). After being given some technical training on phone use and data collection, they were provided with basic initial training in vital signs monitoring, and in the identification of signs of distress in children and pregnant women. The CHWs could use their phones for tele-consultations with medical staff (gynaecologists, paediatricians, internists and surgeons). Quarterly face-to-face training was augmented by tele-training. It is very clear that this intervention had a much stronger focus on ‘work processes as a by-product of learning’ including ‘consultation’ and ‘embedding on-going training within the intervention design’, a fact overlooked by the other interventions. The key findings are summarised in Table 1.

| Key discussion points                                                                                                                                                                                                      | Implications                                                                                                                                                                                                                 |
|----------------------------------------------------------------------------------------------------------------------------------------------------------------------------------------------------------------------------|------------------------------------------------------------------------------------------------------------------------------------------------------------------------------------------------------------------------------|
| There is a large overlap between the primary studies included in the systematic reviews, but little overlap in their allocation to intervention categories.                                                                | Potential for misclassification and further research is required to determine more robust classification categories.                                                                                                         |
| As a result, there seems to be little agreement between reviews regarding what type of interventions can directly facilitate CHWs’ education and training and how such learning can be defined.                            | There is not a coherent evidence base due to a lack of primary studies explicitly detailing the role of their interventions in learning and training.                                                                        |
| We used educational research to develop a refined coding tool                                                                                                                                                              | The coding tool we used is available in Supplementary Material 6. Details of the theories it is based on is available in Supplementary Material 7.<br><br>The tool was designed to be refined as the evidence base develops. |
| The need to produce evidence on how mobile technology can support reflective and interactive forms of CHWs’ education and training, particularly coaching, supervision and mentoring, remain critically neglected overall. | A new interdisciplinary research agenda on training and education in mHealth, that builds on existing global health research and moves away from information dissemination model of learning is needed.                      |
| Focus on the developmental needs of CHWs to improve their practice                                                                                                                                                         | Targeted training approaches that use new technologies in innovative ways to promote CHWs’ CPD are required. In particular, theories of work-based learning need to be better implemented.                                   |
| The review has highlighted the need for                                                                                                                                                                                    | CHWs’ decision-support tools would                                                                                                                                                                                           |



|                                                                                                                            |                                                                                                                                                                                                                                                                                         |
|----------------------------------------------------------------------------------------------------------------------------|-----------------------------------------------------------------------------------------------------------------------------------------------------------------------------------------------------------------------------------------------------------------------------------------|
| <p>more evidence on the precise nature of CHWs' education and training that can be supported by mHealth interventions.</p> | <p>have the means to offer insights into CHWs' learning, but studies generally do not explore learning aspects of these tools. At most, learning is seen as a positive by-product. We argue that this should include better documentation of learning practices in primary studies.</p> |
|----------------------------------------------------------------------------------------------------------------------------|-----------------------------------------------------------------------------------------------------------------------------------------------------------------------------------------------------------------------------------------------------------------------------------------|

Table 1: Summary of the implications of our key discussion points.

### Limitations

Our scoping review only covers systematic reviews published up to 2017, which means that only primary studies published up to 2015 were included. Our work is open to the biases inherent in relying on existing systematic reviews. However, the scoping review seems well designed to deal with these: First, we included a large number of systematic reviews (n=16), ensuring a wide coverage of primary studies included in these reviews. Second, we further re-analyse the studies included in these reviews to mitigate any quality concerns regarding the included systematic reviews themselves. In targeting secondary literature, we rely on education researchers' interpretation of mobile learning and workplace-based learning in order to unpack patterns in categorisations and conceptualisations. We have made this process transparent through inclusion of our coding tool (see Supplementary Material 6) and references.<sup>9,10,38-49</sup> Other researchers may take an alternative perspective on this literature.

### Conclusion

The findings from this scoping review suggest the mHealth literature is in danger of overclaiming regarding its ability to promote CHWs' education and training within a community work context. Studies claiming to have an educational component to their mHealth intervention were not often informed by educational theory nor was the educational approach taken well documented. The review has highlighted the need for more evidence on the precise nature of CHWs' education and training that can be supported by mHealth interventions. This needs to start with improved categorisation, building on educational frameworks and richer accounts of learning.<sup>39</sup> The mechanisms for achieving educational outcomes are still unknown and educational theory should be embedded in the design of an intervention as well as in its evaluation – for which further cross-disciplinary work between global health and education is needed. Appropriate models of technology-enhanced learning<sup>40-42</sup> and extended use of educational theories will enable the development of much needed robust evidence on the role of technology in supporting CHWs' education and training in mHealth. Achieving this will be challenging, given the complex realities of using mHealth in low-income settings. Nevertheless, we promote<sup>50</sup> the use of training tools which employ empirically proven equitable pedagogic strategies to maximise learning as a continual process of 'participation',<sup>43</sup> within a social justice approach to global health.<sup>51</sup>

### Acknowledgments

1  
2  
3 We thank Dr Shobhana Nagraj and also the five reviewers for their insightful  
4 comments on the paper.  
5

### 6 **Funding statement**

7 This research received no specific grant from any funding agency in the public,  
8 commercial or not-for-profit sectors  
9

### 10 **Competing interests**

11 None declared  
12

### 13 **Data Sharing**

14 All relevant data are within the paper and supporting material.  
15  
16  
17

### 18 **References**

- 19  
20 1. Oliver M, Geniets A, Winters N, et al. What do community health workers have to  
21 say about their work, and how can this inform improved programme design? A case  
22 study with CHWs within Kenya. *Glob Health Action* 2015;8(1):27168.  
23  
24 2. Braun R, Catalani C, Wimbush J, et al. Community health workers and mobile  
25 technology: a systematic review of the literature. *PloS One* 2013;8(6):e65772.  
26  
27 3. Hall CS, Fottrell E, Wilkinson S, et al. Assessing the impact of mHealth  
28 interventions in low-and middle-income countries—what has been shown to work?.  
29 *Glob Health Action* 2014;7(1):25606.  
30  
31 4. O'Donovan J, Bersin A, O'Donovan C. The effectiveness of mobile health  
32 (mHealth) technologies to train healthcare professionals in developing countries: a  
33 review of the literature. *BMJ Innov*;1(1):33-6.  
34  
35 5. Bleakley A. Broadening conceptions of learning in medical education: the  
36 message from teamworking. *Med Educ* 2006;40(2):150-7.  
37  
38 6. Sturmberg JP, Farmer L. Educating capable doctors—A portfolio approach.  
39 Linking learning and assessment. *Med Teach* 2009;31(3):e85-9.  
40  
41 7. Williams PL. Using theories of professional knowledge and reflective practice to  
42 influence educational change. *Med Teach* 1998;20(1):28-34.  
43  
44 8. Taylor DC, Hamdy H. Adult learning theories: Implications for learning and  
45 teaching in medical education: AMEE Guide No. 83. *Med Teach* 2013;35(11):e1561-  
46 72.  
47  
48 9. Eraut M, Hirsh W. The significance of workplace learning for individuals, groups  
49 and organisations. Skope Monograph Number 9. Accessed September 2017:  
50 [http://www.skope.ox.ac.uk/?person=the-significance-of-workplace-learning-for-](http://www.skope.ox.ac.uk/?person=the-significance-of-workplace-learning-for-individuals-groups-and-organisations)  
51 [individuals-groups-and-organisations](http://www.skope.ox.ac.uk/?person=the-significance-of-workplace-learning-for-individuals-groups-and-organisations)  
52  
53  
54  
55  
56  
57  
58  
59  
60

10. Kearney M, Schuck S, Burden K, et al. Viewing mobile learning from a pedagogical perspective. *Research in learning technology* 2012;20(1):14406.
11. Labrique AB, Vasudevan L, Kochi E, et al. mHealth innovations as health system strengthening tools: 12 common applications and a visual framework. *Global Health Sci Prac* 2013;1(2):160-71.
12. Aranda-Jan CB, Mohutsiwa-Dibe N, Loukanova S. Systematic review on what works, what does not work and why of implementation of mobile health (mHealth) projects in Africa. *BMC Public Health*. 2014;14(1):188.
13. Colquhoun HL, Levac D, O'Brien KK, et al. Scoping reviews: time for clarity in definition, methods, and reporting. *J Clin Epidemiol* 2014;67(12):1291-4.
14. Arksey H, O'Malley L. Scoping studies: towards a methodological framework. *Int J Soc Res Methodol* 2005;8(1):19-32.
15. Miake-Lye IM, Hempel S, Shanman R, et al. What is an evidence map? A systematic review of published evidence maps and their definitions, methods, and products. *Syst rev*. 2016;5(1):28.
16. Lewin S, Munabi-Babigumira S, et al. Lay health workers in primary and community health care for maternal and child health and the management of infectious diseases. *Cochrane Database Syst Rev* 2010 Mar 17.
17. World Bank. Country classifications. Accessed September 2017: <http://blogs.worldbank.org/opendata/category/tags/news>
18. Adepoju IO, Albersen BJ, De Brouwere V, et al. mHealth for Clinical Decision-Making in Sub-Saharan Africa: A Scoping Review. *JMIR Mhealth Uhealth* 2017;5(3).
19. Tian M, Zhang J, Luo R, et al. mHealth Interventions for Health System Strengthening in China: A Systematic Review. *JMIR Mhealth Uhealth* 2017;5(3).
20. Florez-Arango JF, Iyengar MS, Dunn K, et al. Performance factors of mobile rich media job aids for community health workers. *J Am Med Inform Assoc* 2011;18(2):131-7.
21. Iyengar MS, Florez-Arango JF. Decreasing workload among community health workers using interactive, structured, rich-media guidelines on smartphones. *Technol Health Care* 2013;21(2):113-23.
22. DeRenzi B, Findlater L, Payne J, et al. Improving community health worker performance through automated SMS. In: Proceedings of the Fifth International Conference on Information and Communication Technologies and Development 2012 Mar 12: 25-34.
23. Zurovac D, Sudoi RK, Akhwale WS, et al. The effect of mobile phone text-message reminders on Kenyan health workers' adherence to malaria treatment guidelines: a cluster randomised trial. *Lancet* 2011;378(9793):795-803.



- 1  
2  
3  
4 24. Bowker GC, Star SL. *Sorting things out: Classification and its consequences*.  
5 Cambridge: MIT Press 2000.  
6
- 7 25. Blaschke S, Bokenkamp K, Cosmaciuc R, et al. *Using mobile phones to improve*  
8 *child nutrition surveillance in Malawi*. Brooklyn, NY: UNICEF Malawi, UNICEF  
9 *Innovations, Mobile Development Solutions*. 2009.  
10
- 11 26. Svoronos T, Mjungu P, Dhadialla R, et al. *CommCare: Automated quality*  
12 *improvement to strengthen community-based health*. Weston, Mass.: D-Tree  
13 *International*. 2010.  
14
- 15 27. Martínez-Fernández A, Lobos-Medina I, Díaz-Molina CA, et al. *TulaSalud: An m-*  
16 *health system for maternal and infant mortality reduction in Guatemala*. *J Telemed*  
17 *Telecare* 2015;21(5):283-91.  
18
- 19 28. Marquez L, Kean L. *Making supervision supportive and sustainable: new*  
20 *approaches to old problems*. *MAQ Working Paper No. 4* Accessed September 2017:  
21 <https://www.k4health.org/sites/default/files/maqpaperonsupervision.pdf>  
22  
23
- 24 29. Ashwell HE, Freeman P. *The clinical competency of community health workers in*  
25 *the eastern highlands province of Papua New Guinea*. *P N G Med J* 1995;38(3):198-  
26 207.  
27
- 28 30. Baqui AH, Arifeen SE, Rosen HE, et al. *Community-based validation of*  
29 *assessment of newborn illnesses by trained community health workers in Sylhet*  
30 *district of Bangladesh*. *Trop Med Int Health* 2009;14(12):1448-56.  
31  
32
- 33 31. Bhattacharji S, Abraham S, Muliyl J, et al. *Evaluating community health worker*  
34 *performance in India*. *Health Policy Plan* 1986;1(3):232-9.  
35
- 36 32. Bhattacharyya K, LeBan K, Winch P, et al. *Community health workers: incentives*  
37 *and disincentives: how they affect motivation, retention, and sustainability*. Published  
38 *by the Basic Support for Institutionalizing Child Survival Project (Basics II) for the*  
39 *United States Agency for International Development, Arlington, Virginia*. 2001.  
40 Accessed September 2017: [http://pdf.usaid.gov/pdf\\_docs/Pnacq722.pdf](http://pdf.usaid.gov/pdf_docs/Pnacq722.pdf)  
41  
42
- 43 33. Laughlin M. *The Care Group difference: A guide to mobilizing community-based*  
44 *volunteer health educators*. Baltimore, Md, USA: World Relief, 2004. Accessed  
45 September 2017:  
46 <http://www.k4health.org/system%252Ffiles%252FCare%2BGroup%2BManual.pdf>  
47  
48
- 49 34. Lehmann U, Sanders D. *Community health workers: what do we know about*  
50 *them. The state of the evidence on programmes, activities, costs and impact on*  
51 *health outcomes of using community health workers*. Geneva: World Health  
52 *Organization* 2007.  
53
- 54 35. Winters N, Oliver M, Langer L. *Can mobile health training meet the challenge of*  
55 *'measuring better'?*. *Comparative Education* 2017;53(1):115-31.  
56  
57  
58  
59

- 1  
2  
3 36. Irimu G, Ogero M, Mbevi G on behalf of the Clinical Information Network Authors  
4 Group, *et al.* Approaching quality improvement at scale: a learning health system  
5 approach in Kenya. *Archives of Disease in Childhood* Published Online First: 07  
6 March 2018. doi:10.1136/archdischild-2017-314348  
7
- 8 37. Jones CO, Wasunna B, Sudoi R, *et al.* “Even if you know everything you can  
9 forget”: health worker perceptions of mobile phone text-messaging to improve  
10 malaria case-management in Kenya. *PLoS One* 2012;7(6):e38636.  
11
- 12 38. Henry JV, Winters N, Lakati A, *et al.* Enhancing the supervision of community  
13 health workers with WhatsApp mobile messaging: qualitative findings from 2 low-  
14 resource settings in Kenya. *Global Health Sci Prac* 2016;4(2):311-25.  
15
- 16 39. Mayes T, De Freitas S. Technology-enhanced learning. In: Beetham H, Sharpe  
17 R. eds. *Rethinking Pedagogy for a Digital Age: Designing for 21st Century Learning*.  
18 London: Routledge 2013:17-30.  
19
- 20 40. Laurillard D, Oliver M, Wasson B, *et al.* Implementing technology-enhanced  
21 learning. In: Balacheff N, Ludvigsen S, de Jong T, *et al.* eds. *Technology-enhanced*  
22 *learning: Principles and products*. Dordrecht: Springer 2009.  
23
- 24 41. Davies C, Eynon R, editors. *Education and Technology: Major Themes in*  
25 *Education: Critical Issues in the Ongoing Development of the Field*. Routledge 2016.  
26
- 27 42. Selwyn N. *Education and technology: Key issues and debates*. London:  
28 Bloomsbury Publishing 2016  
29
- 30 43. Sfard A. On Two Metaphors for Learning and the Dangers of Choosing Just One.  
31 *Educational Researcher* 1998;27(2):4-13.  
32
- 33 44. Bleakley, A. Broadening Conceptions of Learning in Medical Education: The  
34 Message from Teamworking. *Medical Education* 2006;40: 150–157.  
35
- 36 45. Laurillard D. Pedagogical Forms of Mobile Learning: Framing Research  
37 Questions. In: Pachler N, ed. *Mobile Learning: Towards a Research Agenda*.  
38 London: UCL Institute of Education. 2007.  
39
- 40 46. Pachler N, Bachmair B, Cook J. *Mobile Learning: Structures, Agency, Practices*.  
41 New York: Springer. 2009.  
42
- 43 47. Wali E, Winters N, Oliver M. Maintaining, Changing and Crossing Contexts: An  
44 Activity Theoretic Reinterpretation of Mobile Learning. *Research in Learning*  
45 *Technology* 2008; 16 (1): 41–57.  
46
- 47 48. Winters N. Mobile Learning in the Majority World: A Critique of the GSMA  
48 Position. In Price S, Jewitt C. Brown B. eds. *Sage Handbook of Researching Digital*  
49 *Technologies*. London: Sage. 2013: 402–411.  
50
- 51 49. Mann K. Theoretical Perspectives in Medical Education: Past Experience and  
52 Future Possibilities. *Medical Education* 2011;45: 60–68.  
53  
54  
55  
56  
57  
58  
59

1  
2  
3  
4 50. Winters N, O'Donovan, J, Geniets, A. A new era for community health in  
5 countries of low and middle income? *The Lancet Global Health* 2018;6(5): e489-  
6 e490  
7

8 51. Farmer P. *Pathologies of Power: Health, Human Rights and the New War on the*  
9 *Poor*. Berkeley: University of California Press. 2003.  
10

### 11 12 **Figure legends**

13  
14  
15 Figure 1 PRISMA flow chart of identification and inclusion of studies

16  
17 Figure 2 Overview of mHealth intervention categories taken directly from the 16  
18 included systematic reviews. The primary studies were often characterised differently  
19 by different systematic reviews.  
20  
21  
22  
23  
24  
25  
26  
27  
28  
29  
30  
31  
32  
33  
34  
35  
36  
37  
38  
39  
40  
41  
42  
43  
44  
45  
46  
47  
48  
49  
50  
51  
52  
53  
54  
55  
56  
57  
58  
59  
60

1  
2  
3  
4  
5  
6  
7  
8  
9  
10  
11  
12  
13  
14  
15  
16  
17  
18  
19  
20  
21  
22  
23  
24  
25  
26  
27  
28  
29  
30  
31  
32  
33  
34  
35  
36  
37  
38  
39  
40  
41  
42  
43  
44  
45  
46  
47  
48  
49  
50  
51  
52  
53  
54  
55  
56  
57  
58  
59  
60

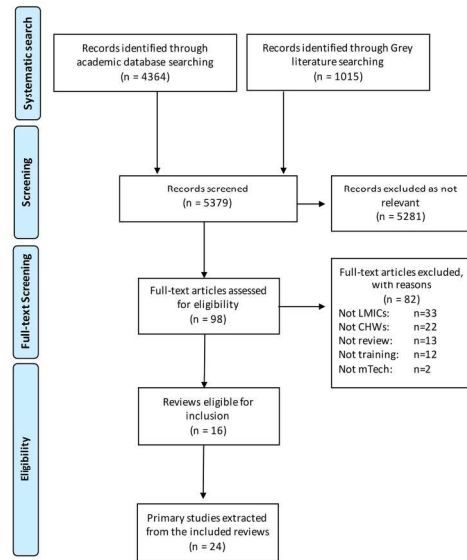

Figure 1 PRISMA flow chart of identification and inclusion of studies

190x107mm (300 x 300 DPI)

Review only

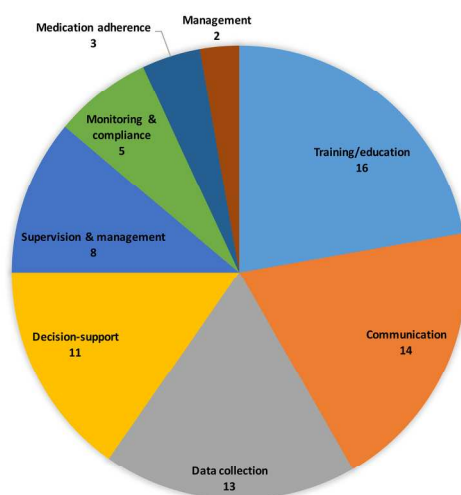

Figure 2 Overview of mHealth intervention categories taken directly from the 16 included systematic reviews. The primary studies were often characterised differently by different systematic reviews.

190x107mm (300 x 300 DPI)

## Supplementary Material 1: Search terms

Search terms:

Mhealth terms: (mhealth OR m-health OR “mobile health” OR ((mobile technolog\* OR “mobile phone” OR “mobile device” OR phone OR tablet OR PDA OR “personal digital assistant” OR iPad OR iPod OR “smart phone” OR “feature phone” OR app OR “mobile application”) AND Health) OR (“Text messag\*” OR “short messag\*” OR SMS OR “social media” OR “mobile communication”) AND health)

Review terms: (“systematic review” OR “literature review” OR “meta-analysis” OR “review of reviews” OR “systematic map” OR “evidence map” OR “evidence gap map” OR “evidence synthesis” OR “research synthesis”)

Developing country term: (“developing countr\*” OR LMICs OR “low- and middle-income countr\*” OR “low and middle income countr\*” OR Africa OR Asia OR “Latin America” OR “East\* Europe” OR “majority world” OR “global south”)

## Supplementary Material 2: Systematic search records

| Source              | Terms                                                                                                                          | Results             |
|---------------------|--------------------------------------------------------------------------------------------------------------------------------|---------------------|
| Google Scholar      | ("mobile health" OR mHealth)<br>AND review AND<br>("developing countries" OR<br>LMICs OR Africa OR Asia<br>OR Latin America")  | 500: 51             |
|                     | Update 30 May 2017<br>(August 2016-May 2017)                                                                                   | 500: 14             |
| Google              | (Mhealth OR "mobile health")<br>AND review                                                                                     | 500: 34<br>Dups 18  |
|                     | Update 30 May 2017<br>(August 2016-May 2017)                                                                                   | 500: 10<br>Dups: 7  |
| 3ie                 | (Mhealth OR "mobile health")                                                                                                   | 1:1                 |
|                     | Update 30 May 2017<br>(August 2016-May 2017)                                                                                   | 7:3<br>Dups: 4      |
| Cochrane            | (Mhealth OR "mobile health")                                                                                                   | 4: 0                |
|                     | Update 30 May 2017<br>(August 2016-May 2017)                                                                                   | 3: 0                |
| Campbell            | (Mhealth OR "mobile health")                                                                                                   | 0                   |
|                     | Update 30 May 2017<br>(August 2016-May 2017)                                                                                   | 0                   |
| CINAHL              | Master string                                                                                                                  | 1247*: 64           |
|                     | Update 30 May 2017<br>(August 2016-May 2017)                                                                                   | 5: 2<br>Dups: 2     |
| Pubmed              | (Mhealth OR "mobile health")<br>OR ("mobile technology*"<br>AND health) AND<br>("systematic review" OR<br>"literature review") | 1008: 41            |
|                     | Update 30 May 2017<br>(August 2016-May 2017)                                                                                   | 46: 5<br>Dups: 4    |
| Medline             | Master string                                                                                                                  | 1247*: 64           |
|                     | Update 30 May 2017<br>(August 2016-May 2017)                                                                                   | 11: 7<br>Dups: 7    |
| PsychInfo           | (Mhealth OR "mobile health")                                                                                                   | 211*: 12            |
|                     | Update 30 May 2017<br>(August 2016-May 2017)                                                                                   | 13                  |
| ERIC                | (Mhealth OR "mobile health")                                                                                                   | 211*: 12            |
|                     | Update 30 May 2017<br>(August 2016-May 2017)                                                                                   | 13                  |
| Education Full-text | (Mhealth OR "mobile health")                                                                                                   | 211*: 12            |
|                     | Update 30 May 2017<br>(August 2016-May 2017)                                                                                   | 13                  |
| Isl web of science  | (Mhealth OR "mobile health")<br>OR ("mobile technology*"<br>AND health) AND<br>("systematic review" OR<br>"literature review") | 465: 82             |
|                     | Update 30 May 2017<br>(August 2016-May 2017)                                                                                   | 111: 14<br>Dups: 12 |



### Supplementary material 3: List of included systematic reviews and primary studies

#### Systematic reviews included in the scoping review

1. Hall, C.S., Fottrell, E., Wilkinson, S. and Byass, P., 2014. Assessing the impact of mHealth interventions in low-and middle-income countries—what has been shown to work?. *Global health action*, 7(1), p.25606.
2. Peiris, D., Praveen, D., Johnson, C. and Mogulluru, K., 2014. Use of mHealth systems and tools for non-communicable diseases in low-and middle-income countries: a systematic review. *Journal of cardiovascular translational research*, 7(8), pp.677-691.
3. Aranda-Jan, C.B., Mohutsiwa-Dibe, N. and Loukanova, S., 2014. Systematic review on what works, what does not work and why of implementation of mobile health (mHealth) projects in Africa. *BMC public health*, 14(1), p.188.
4. Agarwal, S., Perry, H.B., Long, L.A. and Labrique, A.B., 2015. Evidence on feasibility and effective use of mHealth strategies by frontline health workers in developing countries: systematic review. *Tropical medicine & international health*, 20(8), pp.1003-1014.
5. Källander, K., Tibenderana, J.K., Akpogheneta, O.J., Strachan, D.L., Hill, Z., ten Asbroek, A.H., Conteh, L., Kirkwood, B.R. and Meek, S.R., 2013. Mobile health (mHealth) approaches and lessons for increased performance and retention of community health workers in low-and middle-income countries: a review. *Journal of medical Internet research*, 15(1).
6. Braun, R., Catalani, C., Wimbush, J. and Israelski, D., 2013. Community health workers and mobile technology: a systematic review of the literature. *PloS one*, 8(6), p.e65772.
7. Hurt, K., Walker, R.J., Campbell, J.A. and Egede, L.E., 2016. mHealth interventions in low and middle-income countries: a systematic review. *Global journal of health science*, 8(9), p.183.
8. Bloomfield, G.S., Vedanthan, R., Vasudevan, L., Kithei, A., Were, M. and Velazquez, E.J., 2014. Mobile health for non-communicable diseases in Sub-Saharan Africa: a systematic review of the literature and strategic framework for research. *Globalization and health*, 10(1), p.49.
9. Goel, S., Bhatnagar, N., Sharma, D. and Singh, A., 2013. Bridging the human resource gap in primary health care delivery systems of developing countries with mhealth: narrative literature review. *JMIR mHealth and uHealth*, 1(2).
10. O'Donovan, J., Bersin, A. and O'Donovan, C., 2015. The effectiveness of mobile health (mHealth) technologies to train healthcare professionals in developing countries: a review of the literature. *BMJ Innovations*, 1(1), pp.33-36.
11. Chib, A., van Velthoven, M.H. and Car, J., 2015. mHealth adoption in low-resource environments: a review of the use of mobile healthcare in developing countries. *Journal of health communication*, 20(1), pp.4-34.
12. Amoakoh-Coleman, M., Borgstein, A.B.J., Sondaal, S.F., Grobbee, D.E., Miltenburg, A.S., Verwijs, M., Ansah, E.K., Browne, J.L. and Klipstein-Grobusch, K., 2016. Effectiveness of mHealth interventions targeting health care Workers to improve pregnancy outcomes in low-and middle-income countries: a systematic review. *Journal of medical Internet research*, 18(8).
13. Adepoju, I.O.O., Albersen, B.J.A., De Brouwere, V., van Roosmalen, J. and Zweekhorst, M., 2017. mHealth for Clinical Decision-Making in Sub-Saharan Africa: A Scoping Review. *JMIR mHealth and uHealth*, 5(3).

14. Colaci, D., Chaudhri, S. and Vasani, A., 2016. mHealth Interventions in Low-Income Countries to Address Maternal Health: A Systematic Review. *Annals of Global Health*, 82(5), pp.922-935.
15. Tian, M., Zhang, J., Luo, R., Chen, S., Petrovic, D., Redfern, J., Xu, D.R. and Patel, A., 2017. mHealth Interventions for Health System Strengthening in China: A Systematic Review. *JMIR mHealth and uHealth*, 5(3).
16. White, A., Thomas, D.S., Ezeanochie, N. and Bull, S., 2016. Health worker mHealth utilization: a systematic review. *CIN: Computers, Informatics, Nursing*, 34(5), pp.206-213.

#### *Primary studies extracted from the systematic reviews and included in the scoping review*

1. Alam, M., Khanam, T. and Khan, R., 2010, December. Assessing the scope for use of mobile based solution to improve maternal and child health in Bangladesh: A case study. In *Proceedings of the 4th ACM/IEEE International Conference on Information and Communication Technologies and Development* (p. 3). ACM.
  2. Andreatta, P., Debpuur, D., Danquah, A. and Perosky, J., 2011. Using cell phones to collect postpartum hemorrhage outcome data in rural Ghana. *International Journal of Gynecology & Obstetrics*, 113(2), pp.148-151.
  3. Barrington, J., Wereko-Brobby, O., Ward, P., Mwafongo, W. and Kungulwe, S., 2010. SMS for Life: a pilot project to improve anti-malarial drug supply management in rural Tanzania using standard technology. *Malaria journal*, 9(1), p.298.
  4. Chang, L.W., Kagaayi, J., Arem, H., Nakigozi, G., Ssempijja, V., Serwadda, D., Quinn, T.C., Gray, R.H., Bollinger, R.C. and Reynolds, S.J., 2011. Impact of a mHealth intervention for peer health workers on AIDS care in rural Uganda: a mixed methods evaluation of a cluster-randomized trial. *AIDS and Behavior*, 15(8), p.1776.
  5. DeRenzi, B., Findlater, L., Payne, J., Birnbaum, B., Mangilima, J., Parikh, T., Borriello, G. and Lesh, N., 2012, March. Improving community health worker performance through automated SMS. In *Proceedings of the Fifth International Conference on Information and Communication Technologies and Development*(pp. 25-34). ACM.
  6. Diero, L., Rotich, J.K., Bii, J., Mamlin, B.W., Einterz, R.M., Kalamai, I.Z. and Tierney, W.M., 2006. A computer-based medical record system and personal digital assistants to assess and follow patients with respiratory tract infections visiting a rural Kenyan health centre. *BMC Medical Informatics and Decision Making*, 6(1), p.21.
  7. Zurovac, D., Sudoi, R.K., Akhwale, W.S., Ndiritu, M., Hamer, D.H., Rowe, A.K. and Snow, R.W., 2011. The effect of mobile phone text-message reminders on Kenyan health workers' adherence to malaria treatment guidelines: a cluster randomised trial. *The Lancet*, 378(9793), pp.795-803.
- Jones, C.O., Wasunna, B., Sudoi, R., Githinji, S., Snow, R.W. and Zurovac, D., 2012. "Even if you know everything you can forget": health worker perceptions of mobile phone text-messaging to improve malaria case-management in Kenya. *PLoS One*, 7(6), p.e38636.
- Zurovac, D., Larson, B.A., Sudoi, R.K. and Snow, R.W., 2012. Costs and cost-effectiveness of a mobile phone text-message reminder interventions to improve health workers' adherence to malaria guidelines in Kenya. *PloS one*, 7(12), p.e52045.

- 1
  - 2
  - 3
  - 4
  - 5
  - 6
  - 7
  - 8
  - 9
  - 10
  - 11
  - 12
  - 13
  - 14
  - 15
  - 16
  - 17
  - 18
  - 19
  - 20
  - 21
  - 22
  - 23
  - 24
  - 25
  - 26
  - 27
  - 28
  - 29
  - 30
  - 31
  - 32
  - 33
  - 34
  - 35
  - 36
  - 37
  - 38
  - 39
  - 40
  - 41
  - 42
  - 43
  - 44
  - 45
  - 46
  - 47
  - 48
  - 49
  - 50
  - 51
  - 52
  - 53
  - 54
  - 55
  - 56
  - 57
  - 58
  - 59
  - 60
8. Gisore, P., Shipala, E., Otieno, K., Rono, B., Marete, I., Tenge, C., Mabeya, H., Bucher, S., Moore, J., Liechty, E. and Esamai, F., 2012. Community based weighing of newborns and use of mobile phones by village elders in rural settings in Kenya: a decentralised approach to health care provision. *BMC pregnancy and childbirth*, 12(1), p.15.
9. JSI. 2013. Supply Chains for Community Case Management – strategy and plan. Available from: <http://sc4ccm.jsi.com/about-sc4ccm/>
10. Khan, A.J., Khowaja, S., Khan, F.S., Qazi, F., Lotia, I., Habib, A., Mohammed, S., Khan, U., Amanullah, F., Hussain, H. and Becerra, M.C., 2012. Engaging the private sector to increase tuberculosis case detection: an impact evaluation study. *The Lancet infectious diseases*, 12(8), pp.608-616.
11. Lemay, N.V., Sullivan, T., Jumbe, B. and Perry, C.P., 2012. Reaching remote health workers in Malawi: baseline assessment of a pilot mHealth intervention. *Journal of health communication*, 17(sup1), pp.105-117.
12. MacLeod, B., Phillips, J., Stone, A.E., Walji, A. and Awoonor-Williams, J.K., 2012. The architecture of a software system for supporting community-based primary health care with mobile technology: the mobile technology for community health (MoTeCH) initiative in Ghana. *Online Journal of Public Health Informatics*, 4(1).
13. Mahmud, N., Rodriguez, J. and Nesbit, J., 2010. A text message-based intervention to bridge the healthcare communication gap in the rural developing world. *Technology and Health Care*, 18(2), pp.137-144.
14. Ngabo, F., Nguimfack, J., Nwaigwe, F., Mugeni, C., Muhoza, D., Wilson, D.R., Kalach, J., Gakuba, R., Karema, C. and Binagwaho, A., 2012. Designing and Implementing an Innovative SMS-based alert system (RapidSMS-MCH) to monitor pregnancy and reduce maternal and child deaths in Rwanda. *The Pan African Medical Journal*, 13.
15. Palazuelos, D., Diallo, A.B., Palazuelos, L., Carlile, N., Payne, J.D. and Franke, M.F., 2013. User perceptions of an mHealth medicine dosing tool for community health workers. *JMIR mHealth and uHealth*, 1(1).
16. Ramachandran, D., Goswami, V. and Canny, J., 2010, December. Research and reality: using mobile messages to promote maternal health in rural India. In *Proceedings of the 4th ACM/IEEE international conference on information and communication technologies and development* (p. 35). ACM.
17. Svoronos, T., Mjungu, P., Dhadialla, R., Luk, R., Zue, C., Jackson, J. and Lesh, N., 2010. CommCare: Automated quality improvement to strengthen community-based health. *Weston, Mass.: D-Tree International*.
18. Tomlinson, M., Solomon, W., Singh, Y., Doherty, T., Chopra, M., Ijumba, P., Tsai, A.C. and Jackson, D., 2009. The use of mobile phones as a data collection tool: a report from a household survey in South Africa. *BMC Medical Informatics and Decision Making*, 9(1), p.51.
19. Blaschke, S., Bokenkamp, K., Cosmaciuc, R., Denby, M., Hailu, B. and Short, R., 2009. Using mobile phones to improve child nutrition surveillance in Malawi. *Brooklyn, NY: UNICEF Malawi, UNICEF Innovations, Mobile Development Solutions*.
20. Munro, M.L., Lori, J.R., Boyd, C.J. and Andreatta, P., 2014. Knowledge and skill retention of a mobile phone data collection protocol in rural Liberia. *Journal of Midwifery & Women's Health*, 59(2), pp.176-183.
- Lori, J.R., Munro, M.L., Boyd, C.J. and Andreatta, P., 2012. Cell phones to collect pregnancy data from remote areas in Liberia. *Journal of Nursing Scholarship*, 44(3), pp.294-301.

- 1  
2  
3  
4  
5  
6  
7  
8  
9  
10  
11  
12  
13  
14  
15  
16  
17  
18  
19  
20  
21  
22  
23  
24  
25  
26  
27  
28  
29  
30  
31  
32  
33  
34  
35  
36  
37  
38  
39  
40  
41  
42  
43  
44  
45  
46  
47  
48  
49  
50  
51  
52  
53  
54  
55  
56  
57  
58  
59  
60
21. McNabb, M., Chukwu, E., Ojo, O., Shekhar, N., Gill, C.J., Salami, H. and Jega, F., 2015. Assessment of the quality of antenatal care services provided by health workers using a mobile phone decision support application in northern Nigeria: a pre/post-intervention study. *PLOS one*, 10(5), p.e0123940.
22. Martínez-Fernández, A., Lobos-Medina, I., Díaz-Molina, C.A., Chen-Cruz, M.F. and Prieto-Egido, I., 2015. TulaSalud: An m-health system for maternal and infant mortality reduction in Guatemala. *Journal of telemedicine and telecare*, 21(5), pp.283-291.
23. Little, A., Medhanyie, A., Yebyo, H., Spigt, M., Dinant, G.J. and Blanco, R., 2013. Meeting community health worker needs for maternal health care service delivery using appropriate mobile technologies in Ethiopia. *PloS one*, 8(10), p.e77563.
- Medhanyie, A.A., Little, A., Yebyo, H., Spigt, M., Tadesse, K., Blanco, R. and Dinant, G.J., 2015. Health workers' experiences, barriers, preferences and motivating factors in using mHealth forms in Ethiopia. *Human resources for health*, 13(1), p.2.
- Medhanyie, A.A., Moser, A., Spigt, M., Yebyo, H., Little, A., Dinant, G. and Blanco, R., 2015. Mobile health data collection at primary health care in Ethiopia: a feasible challenge. *Journal of Clinical Epidemiology*, 68(1), pp.80-86.
24. Surka, S., Edirippulige, S., Steyn, K., Gaziano, T., Puoane, T. and Levitt, N., 2014. Evaluating the use of mobile phone technology to enhance cardiovascular disease screening by community health workers. *International journal of medical informatics*, 83(9), pp.648-654.

### Supplementary Material 4: Summary of the included primary studies

| Primary study     | Country                    | Area                    | Tool           | Methodology                                           | Number of participants / sample (n) <sup>1</sup> |
|-------------------|----------------------------|-------------------------|----------------|-------------------------------------------------------|--------------------------------------------------|
| Alam (2010)       | Bangladesh (urban)         | MCH                     | Custom design  | Case study                                            | 27 CHWs, 6 supervisors                           |
| Andreatta (2011)  | Ghana (rural)              | MCH                     | SMS            | Case study                                            | 8 traditional birth attendants, 2 midwives       |
| Barrington (2010) | Tanzania (rural)           | Malaria                 | SMS            | Pilot study                                           | Health facility workers at 129 rural clinics     |
| Chang (2011)      | Uganda (rural)             | AIDS                    | SMS            | Mixed methods: RCT and qualitative process evaluation | 29 Peer health care workers                      |
| Derenzi (2012)    | Tanzania (rural and urban) | Chronic care (esp. HIV) | CommCare       | Quasi-experimental: multiple experiments and designs  | 87 CHWs<br>n=30                                  |
| Diero (2006)      | Kenya (rural)              | Respiratory             | Palm Pilot PDA | Case study                                            | CHWs, unclear                                    |
| Zurovac (2011)    | Kenya (rural)              | Malaria                 | SMS            | Cluster RCT                                           | 119 CHWs                                         |

<sup>1</sup> Where not explicitly stated to the contrary, the number of intervention participants and the research sample was synonymous.

|    |                     |                            |                                                         |                            |                                               |                                              |
|----|---------------------|----------------------------|---------------------------------------------------------|----------------------------|-----------------------------------------------|----------------------------------------------|
| 1  |                     |                            |                                                         |                            |                                               |                                              |
| 2  |                     |                            |                                                         |                            |                                               |                                              |
| 3  |                     |                            |                                                         |                            |                                               |                                              |
| 4  | Gisore (2012)       | Kenya (rural)              | MCH                                                     | Phone and weighting scales | Case study                                    | 474 village elders                           |
| 5  |                     |                            |                                                         |                            |                                               |                                              |
| 6  |                     |                            |                                                         |                            |                                               |                                              |
| 7  | JSI (2013)          | Rwanda (unclear)           | Supply chain Management                                 | Mobile phone               | N/A (grey lit)                                | 371 CHWs                                     |
| 8  |                     |                            |                                                         |                            |                                               |                                              |
| 9  |                     |                            |                                                         |                            |                                               |                                              |
| 10 |                     |                            |                                                         |                            |                                               |                                              |
| 11 | Khan (2012)         | Pakistan (urban)           | TB                                                      | Custom design              | Quasi-experimental: retrospective controlled  | Community laypeople as TB screeners, unclear |
| 12 |                     |                            |                                                         |                            |                                               |                                              |
| 13 |                     |                            |                                                         |                            |                                               |                                              |
| 14 |                     |                            |                                                         |                            |                                               |                                              |
| 15 | Lemay (2012)        | Malawi (rural)             | Family planning/reproductive health/ HIV/AIDS knowledge | Frontline SMS              | Mixed methods                                 | 638 CHWs                                     |
| 16 |                     |                            |                                                         |                            |                                               |                                              |
| 17 |                     |                            |                                                         |                            |                                               |                                              |
| 18 |                     |                            |                                                         |                            |                                               |                                              |
| 19 | MacLeod (2012)      | Ghana (rural)              | MCH                                                     | MoTECH                     | Technical evaluation study                    | Community health volunteer, unclear          |
| 20 |                     |                            |                                                         |                            |                                               |                                              |
| 21 |                     |                            |                                                         |                            |                                               |                                              |
| 22 |                     |                            |                                                         |                            |                                               |                                              |
| 23 | Mahmud (2010)       | Malawi (rural)             | Communication                                           |                            | Pilot study                                   | 75 CHWs                                      |
| 24 |                     |                            |                                                         |                            |                                               |                                              |
| 25 |                     |                            |                                                         |                            |                                               |                                              |
| 26 |                     |                            |                                                         |                            |                                               |                                              |
| 27 | Ngabo (2012)        | Rwanda (rural)             | MCH                                                     | RapidSMS                   | Pilot study                                   | 432 CHWs                                     |
| 28 |                     |                            |                                                         |                            |                                               |                                              |
| 29 |                     |                            |                                                         |                            |                                               |                                              |
| 30 |                     |                            |                                                         |                            |                                               |                                              |
| 31 | Palazeus (2013)     | Mexico & Guatemala (rural) | Dosing                                                  | CommCare                   | Descriptive survey and qualitative interviews | 17 CHWs                                      |
| 32 |                     |                            |                                                         |                            |                                               |                                              |
| 33 |                     |                            |                                                         |                            |                                               |                                              |
| 34 |                     |                            |                                                         |                            |                                               |                                              |
| 35 | Ramachandran (2010) | India (rural)              | MCH                                                     | Java applet                | Case study                                    | 7 rural health workers                       |
| 36 |                     |                            |                                                         |                            |                                               |                                              |
| 37 |                     |                            |                                                         |                            |                                               |                                              |
| 38 |                     |                            |                                                         |                            |                                               |                                              |
| 39 |                     |                            |                                                         |                            |                                               |                                              |
| 40 |                     |                            |                                                         |                            |                                               |                                              |
| 41 |                     |                            |                                                         |                            |                                               |                                              |
| 42 |                     |                            |                                                         |                            |                                               |                                              |
| 43 |                     |                            |                                                         |                            |                                               |                                              |
| 44 |                     |                            |                                                         |                            |                                               |                                              |
| 45 |                     |                            |                                                         |                            |                                               |                                              |
| 46 |                     |                            |                                                         |                            |                                               |                                              |

|    |                               |                              |                  |               |                                            |                                              |
|----|-------------------------------|------------------------------|------------------|---------------|--------------------------------------------|----------------------------------------------|
| 1  |                               |                              |                  |               |                                            |                                              |
| 2  |                               |                              |                  |               |                                            |                                              |
| 3  |                               |                              |                  |               |                                            |                                              |
| 4  | Svoronos (2010)               | Tanzania (rural)             | MCH              | CommCare      | Pilot study                                | 5 CHWs                                       |
| 5  |                               |                              |                  |               |                                            |                                              |
| 6  |                               |                              |                  |               |                                            |                                              |
| 7  | Tomlinson (2009)              | South Africa<br>(peri-urban) | Data collection  | Java applet   | Pilot study                                | 24 CHWs                                      |
| 8  |                               |                              |                  |               |                                            |                                              |
| 9  |                               |                              |                  |               |                                            |                                              |
| 10 |                               |                              |                  |               |                                            |                                              |
| 11 | Blaschke (2009)               | Malawi (rural)               | Child nutrition  | RapidSMS      | Pilot study                                | Health<br>surveillance<br>assistant, unclear |
| 12 |                               |                              |                  |               |                                            |                                              |
| 13 |                               |                              |                  |               |                                            |                                              |
| 14 |                               |                              |                  |               |                                            |                                              |
| 15 | Munro (2014)                  | Liberia (rural)              | MCH              | SMS           | Quasi-experimental:<br>Before/after design | 99 traditional<br>birth attendees            |
| 16 |                               |                              |                  |               |                                            |                                              |
| 17 |                               |                              |                  |               |                                            |                                              |
| 18 |                               |                              |                  |               |                                            |                                              |
| 19 | McNabb (2015)                 | Nigeria (urban)              | MCH (ANC)        | CommCare      | Quasi-experimental<br>Before/after design  | 152 CHWs, 20<br>supervisors                  |
| 20 |                               |                              |                  |               |                                            |                                              |
| 21 |                               |                              |                  |               |                                            |                                              |
| 22 |                               |                              |                  |               |                                            |                                              |
| 23 | Martínez-<br>Fernández (2015) | Guatemala<br>(rural)         | Infant mortality | Custom design | Case study                                 | 125 Community<br>facilitators                |
| 24 |                               |                              |                  |               |                                            |                                              |
| 25 |                               |                              |                  |               |                                            |                                              |
| 26 |                               |                              |                  |               |                                            |                                              |
| 27 | Little (2013)                 | Ethiopia (rural)             | Maternal health  | Custom design | Case study                                 | 20 Health<br>extension<br>workers            |
| 28 |                               |                              |                  |               |                                            |                                              |
| 29 |                               |                              |                  |               |                                            |                                              |
| 30 |                               |                              |                  |               |                                            |                                              |
| 31 | Surka (2015)                  | South Africa<br>(urban)      | CVD screening    | CommCare      | Mixed methods pilot<br>study               | 24 CHWs                                      |
| 32 |                               |                              |                  |               |                                            |                                              |
| 33 |                               |                              |                  |               |                                            |                                              |
| 34 |                               |                              |                  |               |                                            |                                              |
| 35 |                               |                              |                  |               |                                            |                                              |
| 36 |                               |                              |                  |               |                                            |                                              |
| 37 |                               |                              |                  |               |                                            |                                              |
| 38 |                               |                              |                  |               |                                            |                                              |
| 39 |                               |                              |                  |               |                                            |                                              |
| 40 |                               |                              |                  |               |                                            |                                              |
| 41 |                               |                              |                  |               |                                            |                                              |
| 42 |                               |                              |                  |               |                                            |                                              |
| 43 |                               |                              |                  |               |                                            |                                              |
| 44 |                               |                              |                  |               |                                            |                                              |
| 45 |                               |                              |                  |               |                                            |                                              |
| 46 |                               |                              |                  |               |                                            |                                              |



## Supplementary Material 5: Categorisation and re-analysis of included studies

| COLUMN 1          |                                                                                                                                      |                                                   | COLUMN 2                                 |                             |                                                   |                                                | COLUMN 3                                |                     |                      |                                   |
|-------------------|--------------------------------------------------------------------------------------------------------------------------------------|---------------------------------------------------|------------------------------------------|-----------------------------|---------------------------------------------------|------------------------------------------------|-----------------------------------------|---------------------|----------------------|-----------------------------------|
| Primary study     | Intervention allocation                                                                                                              | Agreement in allocation between systematic review | Reclassification of intervention as WPL? |                             |                                                   |                                                | Reclassification of intervention as ML? |                     |                      |                                   |
|                   |                                                                                                                                      |                                                   | <i>Learning by-product of work</i>       | <i>Learning within work</i> | <i>Learning for work</i>                          | <i>Reclassification: fits WPL?<sup>2</sup></i> | <i>Personalisation</i>                  | <i>Authenticity</i> | <i>Collaboration</i> | <i>Reclassification: fits ML?</i> |
| Alam (2010)       | (1) Supervision & monitoring <sup>c</sup> ;<br>(2) Data collection <sup>ab</sup>                                                     | 2 different allocations                           | No evidence                              | No evidence                 | No evidence                                       | No                                             | No evidence                             | No evidence         | No evidence          | No                                |
| Andreatta (2011)  | (1) Data collection <sup>b</sup> ;<br>(2) Training & education <sup>ad</sup> ;<br>Training;<br>(3) Medication adherence <sup>e</sup> | 4 different allocations                           | No evidence                              | No evidence                 | Training in the use of a data reporting protocol. | No                                             | No evidence                             | No evidence         | No evidence          | No                                |
| Barrington (2010) | (1) Data collection <sup>b</sup> ;<br>(2) Training & education <sup>a</sup> ;<br>(3) Management <sup>e</sup>                         | 2 different allocations                           | No evidence                              | No evidence                 | Training in the use of a mobile phone.            | No                                             | No evidence                             | No evidence         | No evidence          | No                                |
| Chang (2011)      | (1) Communication <sup>f</sup><br>(2) Training &                                                                                     | 4 different allocations                           | No evidence                              | • Asking questions          | No evidence                                       | Secondary                                      | No evidence                             | No evidence         | No evidence          | No                                |

<sup>2</sup> Secondary refers to a study relating to workplace-based and/or mobile learning only superficially. This can be caused by a lack of detailed reporting of intervention design and implementation or by workplace-based and/or mobile learning only being a minor aspect of the applied intervention that is not fully developed.

|                |                                                                                                                                                      |                         |             |                                                                                                                         |                        |     |             |                                                     |             |     |
|----------------|------------------------------------------------------------------------------------------------------------------------------------------------------|-------------------------|-------------|-------------------------------------------------------------------------------------------------------------------------|------------------------|-----|-------------|-----------------------------------------------------|-------------|-----|
|                | education <sup>e</sup> ;<br>(3) Monitoring & compliance <sup>eg</sup> ;                                                                              |                         |             | <ul style="list-style-type: none"> <li>• Getting information</li> <li>• Locating resource people</li> </ul>             |                        |     |             |                                                     |             |     |
| DeRenzi (2012) | (1) Management <sup>f</sup><br>(2) Communication <sup>ab</sup><br>(3) Monitoring & compliance <sup>g</sup><br>(4) Health system support <sup>d</sup> | 4 different allocations | No evidence | No evidence                                                                                                             | No evidence            | No  | No evidence | No evidence                                         | No evidence | No  |
| Diero (2006)   | (1) Standards and guidelines <sup>d</sup>                                                                                                            | Single review           | No evidence | No evidence                                                                                                             | No evidence            | No  | No evidence | No evidence                                         | No evidence | No  |
| Zurovac (2011) | (1) Decision-support <sup>af</sup><br>(2) Monitoring & compliance <sup>edg</sup><br>(3) Training & education <sup>ad</sup>                           | 3 different allocations |             | <ul style="list-style-type: none"> <li>• Giving and receiving feedback</li> <li>• Use of mediating artefacts</li> </ul> | Being supervised       | Yes |             | Contextualisation of knowledge in practice contexts |             | Yes |
| Gisore (2012)  | (1) Data collection <sup>f</sup><br>(2) Training & education <sup>d</sup>                                                                            | 2 different allocations | No evidence | No evidence                                                                                                             | Training on tool usage | No  | No evidence | No evidence                                         | No evidence | No  |
| JSI (2013)     | (1) Supervision <sup>a</sup><br>(2) Communication <sup>a</sup>                                                                                       | Single review           | No evidence | No evidence                                                                                                             | No evidence            | No  | No evidence | No evidence                                         | No evidence | No  |
| Khan (2011)    | (1) Decision-support <sup>f</sup>                                                                                                                    | Single review           | No evidence | No evidence                                                                                                             | No evidence            | No  | No evidence | No evidence                                         | No evidence | No  |
| Lemay (2012)   | (1) Communication <sup>abd</sup>                                                                                                                     | Agreement               | No evidence | • Asking questions                                                                                                      | No evidence            | No  | No evidence | No evidence                                         | No evidence | No  |
| McLeold (2012) | (1) Supervision <sup>a</sup><br>(2) Communication <sup>a</sup>                                                                                       | Single review           | No evidence | No evidence                                                                                                             | No evidence            | No  | No evidence | No evidence                                         | No evidence | No  |
| Mahmud (2010)  | (1) Training & education <sup>de</sup><br>(2) Communication                                                                                          | 3 different allocations | No evidence | No evidence                                                                                                             | Training on tool usage | No  | No evidence | No evidence                                         | No evidence | No  |

|                     |     |                                          |                         |                                                                                                                                                            |                                                                                                                         |                                                                                                        |           |             |                                            |               |     |
|---------------------|-----|------------------------------------------|-------------------------|------------------------------------------------------------------------------------------------------------------------------------------------------------|-------------------------------------------------------------------------------------------------------------------------|--------------------------------------------------------------------------------------------------------|-----------|-------------|--------------------------------------------|---------------|-----|
|                     |     | <sup>af</sup>                            |                         |                                                                                                                                                            |                                                                                                                         |                                                                                                        |           |             |                                            |               |     |
|                     | (3) | Data collection <sup>a</sup>             |                         |                                                                                                                                                            |                                                                                                                         |                                                                                                        |           |             |                                            |               |     |
| Ngabo (2012)        | (1) | Communication <sup>af</sup>              | 3 different allocations | No evidence                                                                                                                                                | No evidence                                                                                                             | Training on tool usage                                                                                 | No        | No evidence | No evidence                                | Communication | No  |
|                     | (2) | Supervision <sup>a</sup>                 |                         |                                                                                                                                                            |                                                                                                                         |                                                                                                        |           |             |                                            |               |     |
|                     | (3) | Medication adherence <sup>e</sup>        |                         |                                                                                                                                                            |                                                                                                                         |                                                                                                        |           |             |                                            |               |     |
| Palazuelos (2013)   | (1) | Training & education <sup>ai</sup>       | Agreement               | No evidence                                                                                                                                                | No evidence                                                                                                             | Training on tool usage                                                                                 | No        | No evidence | No evidence                                | No evidence   | No  |
|                     | (2) | Medicine adherence <sup>ai</sup>         |                         |                                                                                                                                                            |                                                                                                                         |                                                                                                        |           |             |                                            |               |     |
| Ramachandran (2010) | (1) | Education & training <sup>ad</sup>       | Agreement               | No evidence                                                                                                                                                | No evidence                                                                                                             | No evidence                                                                                            | No        | No evidence | No evidence                                | No evidence   | No  |
| Svoronos (2010)     | (1) | Training & education <sup>a</sup>        | 5 different allocations | <ul style="list-style-type: none"> <li>• Tackling challenging tasks and roles</li> <li>• Problem solving</li> <li>• Standardisation of practice</li> </ul> | <ul style="list-style-type: none"> <li>• Giving and receiving feedback</li> <li>• Use of mediating artefacts</li> </ul> | <ul style="list-style-type: none"> <li>• Being supervised</li> <li>• Training on tool usage</li> </ul> | Yes       | No evidence | Contextualised feedback & practice support | No evidence   | Yes |
|                     | (2) | Decision support <sup>a</sup>            |                         |                                                                                                                                                            |                                                                                                                         |                                                                                                        |           |             |                                            |               |     |
|                     | (3) | Monitoring & compliance <sup>d</sup>     |                         |                                                                                                                                                            |                                                                                                                         |                                                                                                        |           |             |                                            |               |     |
|                     | (4) | Supervision & management <sup>d</sup>    |                         |                                                                                                                                                            |                                                                                                                         |                                                                                                        |           |             |                                            |               |     |
|                     | (5) | Data collection <sup>b</sup>             |                         |                                                                                                                                                            |                                                                                                                         |                                                                                                        |           |             |                                            |               |     |
| Tomlinson (2009)    | (1) | Supervision and management <sup>ad</sup> | 3 different allocations | No evidence                                                                                                                                                | No evidence                                                                                                             | No evidence                                                                                            | No        | No evidence | No evidence                                | No evidence   | No  |
|                     | (2) | Communication <sup>a</sup>               |                         |                                                                                                                                                            |                                                                                                                         |                                                                                                        |           |             |                                            |               |     |
|                     | (3) | Data collection <sup>ef</sup>            |                         |                                                                                                                                                            |                                                                                                                         |                                                                                                        |           |             |                                            |               |     |
| Blaschke (2009)     | (1) | Decision-support <sup>f</sup>            | 2 different allocations | No evidence                                                                                                                                                | <ul style="list-style-type: none"> <li>• Learning from mistakes</li> <li>• Giving and receiving feedback</li> </ul>     | <ul style="list-style-type: none"> <li>• Being supervised</li> <li>• Training on tool usage</li> </ul> | Yes       | No evidence | Contextualised feedback & practice support | No evidence   | Yes |
|                     | (2) | Data collection <sup>g</sup>             |                         |                                                                                                                                                            |                                                                                                                         |                                                                                                        |           |             |                                            |               |     |
| McNabb (2015)       | (1) | Decision-support <sup>m</sup>            | 2 different allocations | Tool forces practice decisions                                                                                                                             | No evidence                                                                                                             | No evidence                                                                                            | Secondary | No evidence | No evidence                                | No evidence   | No  |
|                     | (2) | Data collection <sup>l</sup>             |                         |                                                                                                                                                            |                                                                                                                         |                                                                                                        |           |             |                                            |               |     |

1  
2  
3  
4  
5  
6  
7  
8  
9  
10  
11  
12  
13  
14  
15  
16  
17  
18  
19  
20  
21  
22  
23  
24  
25  
26  
27  
28  
29  
30  
31  
32  
33  
34  
35  
36  
37  
38  
39  
40  
41  
42  
43  
44  
45  
46

|                           |                                                                                                    |                         |                                |                                      |                                                                         |           |                                      |             |             |     |
|---------------------------|----------------------------------------------------------------------------------------------------|-------------------------|--------------------------------|--------------------------------------|-------------------------------------------------------------------------|-----------|--------------------------------------|-------------|-------------|-----|
| Martínez-Fernández (2015) | (1) Decision-support <sup>l</sup><br>(2) Data collection <sup>l</sup><br>(3) Training <sup>l</sup> | Single review           | No evidence                    | Consultation and logistical support. | Using phones for CPD                                                    | Yes       | Distance learning using mobile tools |             |             | Yes |
| Little (2013)             | (1) Data collection <sup>alno</sup><br>(2) Provider-Provider Communication <sup>n</sup>            | 2 different allocations | Tool forces practice decisions | No evidence                          | No evidence                                                             | Secondary | No evidence                          | No evidence | No evidence | No  |
| Munro (2014)              | (1) Data collection <sup>lo</sup>                                                                  | Agreement               |                                |                                      | Learning to use and implement data collection<br>Training on tool usage | Secondary | No evidence                          | No evidence | No evidence | No  |
| Surka (2014)              | (1) Data collection <sup>n</sup>                                                                   | Single review           | Tool forces practice decisions | No evidence                          | Training on tool usage                                                  | Secondary | No evidence                          | No evidence | No evidence | No  |

a=Agrawal (2015); b=Chib (2015); c=Goel (2013); d=Braun (2015); e=Aranda-jan (2014); f=Hall (2014); g=Kallander (2014); h=Hurt (2014); i=O'Donovan; j=Peiris (2014); k=Bloomfield (2014); l=Colaci (2016); m=Adepoju (2017); n=White (2016); o=Amoakoh (2016); p=Tian (2017)

The superscripts a–o above refer to the systematic reviews in which this study has been included. None of these primary studies were covered by Tian (2017).

## Supplementary Material 6: Coding tool

| Theory of learning              | Learning processes                                  |                                              | Studies coded to constitute workplace and mobile learning |                 |                 |                           |
|---------------------------------|-----------------------------------------------------|----------------------------------------------|-----------------------------------------------------------|-----------------|-----------------|---------------------------|
|                                 |                                                     |                                              | Zurovac (2011)                                            | Svoronos (2010) | Blaschke (2009) | Martinez-Fernandez (2015) |
| <b>Workplace based learning</b> | <b>Work Processes with learning as a by-product</b> | Participation in group processes             |                                                           |                 |                 |                           |
|                                 |                                                     | Working alongside others                     |                                                           |                 |                 |                           |
|                                 |                                                     | Consultation                                 |                                                           |                 |                 | YES                       |
|                                 |                                                     | Tackling challenging tasks and roles         |                                                           |                 |                 |                           |
|                                 |                                                     | Problem solving                              |                                                           |                 |                 |                           |
|                                 |                                                     | Trying things out                            |                                                           |                 |                 |                           |
|                                 |                                                     | Consolidating, extending and refining skills | YES                                                       |                 |                 | YES                       |
|                                 |                                                     | Working with                                 |                                                           |                 |                 | YES                       |

1  
2  
3  
4  
5  
6  
7  
8  
9  
10  
11  
12  
13  
14  
15  
16  
17  
18  
19  
20  
21  
22  
23  
24  
25  
26  
27  
28  
29  
30  
31  
32  
33  
34  
35  
36  
37  
38  
39  
40  
41  
42  
43  
44  
45  
46

|  |                                                                      |                                             |                  |     |                                          |     |
|--|----------------------------------------------------------------------|---------------------------------------------|------------------|-----|------------------------------------------|-----|
|  |                                                                      | clients                                     |                  |     |                                          |     |
|  | Learning Activities located <b>within</b> work or learning processes | Asking questions                            |                  |     |                                          |     |
|  |                                                                      | Getting information                         | YES              | YES | YES                                      | YES |
|  |                                                                      | Locating resource people                    |                  |     |                                          | YES |
|  |                                                                      | Listening & observing                       |                  |     |                                          |     |
|  |                                                                      | Reflecting                                  |                  |     |                                          |     |
|  |                                                                      | Learning from mistakes                      |                  |     |                                          |     |
|  |                                                                      | Giving and receiving feedback               |                  |     |                                          |     |
|  |                                                                      | Use of mediating artefacts                  |                  |     |                                          |     |
|  |                                                                      | Learning Processes at or near the workplace | Being supervised |     | YES (see our previous table for details) |     |
|  | Being coached                                                        |                                             |                  |     |                                          | YES |

1  
2  
3  
4  
5  
6  
7  
8  
9  
10  
11  
12  
13  
14  
15  
16  
17  
18  
19  
20  
21  
22  
23  
24  
25  
26  
27  
28  
29  
30  
31  
32  
33  
34  
35  
36  
37  
38  
39  
40  
41  
42  
43  
44  
45  
46

|                        |                 |                             |                                                                                          |                                  |                                    |                                       |
|------------------------|-----------------|-----------------------------|------------------------------------------------------------------------------------------|----------------------------------|------------------------------------|---------------------------------------|
|                        |                 | Being mentored              |                                                                                          |                                  |                                    |                                       |
|                        |                 | Shadowing                   |                                                                                          |                                  |                                    |                                       |
|                        |                 | Visiting other sites        |                                                                                          |                                  |                                    |                                       |
|                        |                 | Conferences                 |                                                                                          |                                  |                                    |                                       |
|                        |                 | Short courses               |                                                                                          |                                  |                                    | YES                                   |
|                        |                 | Working for a qualification |                                                                                          |                                  |                                    |                                       |
|                        |                 | Independent study           |                                                                                          |                                  |                                    |                                       |
|                        |                 |                             |                                                                                          |                                  |                                    |                                       |
| <b>Mobile learning</b> | Personalisation | Agency                      | Medium: improved participants' ability to treat                                          | Low: re-enforce target behaviour |                                    | High: able to call for help as needed |
|                        |                 | Customisation               |                                                                                          |                                  |                                    |                                       |
|                        | Authenticity    | Situatedness                | High: messages received at work (but in the linked paper noted that it was not linked to | High: phones used at work        | Medium: feedback loops for the HSA | High: phones used at work             |



1  
2  
3  
4  
5  
6  
7  
8  
9  
10  
11  
12  
13  
14  
15  
16  
17  
18  
19  
20  
21  
22  
23  
24  
25  
26  
27  
28  
29  
30  
31  
32  
33  
34  
35  
36  
37  
38  
39  
40  
41  
42  
43  
44  
45  
46

|  |               |                   |           |  |  |                              |
|--|---------------|-------------------|-----------|--|--|------------------------------|
|  |               |                   | training) |  |  |                              |
|  |               | Contextualisation |           |  |  |                              |
|  | Collaboration | Data sharing      |           |  |  |                              |
|  |               | Conversation      |           |  |  | High: based on communication |

For peer review only

## Supplementary Material 7: Background on Education Research

We briefly summarise the most salient and relevant ideas from Eraut & Hirsh [9] on workplace-based learning and Kearney et al. [10] on mobile learning.

### *Workplace-based learning*

Research in workplace-based learning allows for the categorisation of the varied nature of training in the workplace. Three categories are relevant to understand how CHWs can be engaged in training while working in their communities: (i) a work practice *within which* learning occurs (e.g. problem solving); (ii) a stand-alone *learning process* during work (e.g. being supervised); and (iii) a time-limited *learning activity* (e.g. giving/receiving feedback or engaging in reflection) on aspects of work practice. Each way in which work practices can support CHW learning were reviewed for each primary study.

### *Mobile learning*

Research in mobile learning has critiqued simplistic conceptualisations of mobile learning as the ability to support anytime, anywhere learning. This ways of framing the use of mobile technologies is seen as particularly out-of-date as technology has developed to a point where authenticity, collaboration and personalisation can provide new insights into mobile learning practices [10]. The ways in which each of these three aspects supported CHW learning were reviewed for each primary study. As such, our framing draws on education researchers' commonly held view of mobile learning a as a socio-cultural form of learning [45-48]. The key point is a focus on how technology supports the learner to produce new knowledge while interacting, often with others, within their environmental context. This way of thinking about the use of technology has aligns strongly with calls by medical educators for the implementation of socio-cultural theories [49] as they "offer a best-fit exploration and explanation" [50: 150] of learning and training for the workplace context. It is important to determine how this line of thinking is relevant for mHealth and CHWs.

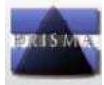

# PRISMA 2009 Checklist

| Section/topic                      | #  | Checklist item                                                                                                                                                                                                                                                                                              | Reported on page #                  |
|------------------------------------|----|-------------------------------------------------------------------------------------------------------------------------------------------------------------------------------------------------------------------------------------------------------------------------------------------------------------|-------------------------------------|
| <b>TITLE</b>                       |    |                                                                                                                                                                                                                                                                                                             |                                     |
| Title                              | 1  | Identify the report as a systematic review, meta-analysis, or both.                                                                                                                                                                                                                                         | Page 1                              |
| <b>ABSTRACT</b>                    |    |                                                                                                                                                                                                                                                                                                             |                                     |
| Structured summary                 | 2  | Provide a structured summary including, as applicable: background; objectives; data sources; study eligibility criteria, participants, and interventions; study appraisal and synthesis methods; results; limitations; conclusions and implications of key findings; systematic review registration number. | Page 2                              |
| <b>INTRODUCTION</b>                |    |                                                                                                                                                                                                                                                                                                             |                                     |
| Rationale                          | 3  | Describe the rationale for the review in the context of what is already known.                                                                                                                                                                                                                              | Page 3-4                            |
| Objectives                         | 4  | Provide an explicit statement of questions being addressed with reference to participants, interventions, comparisons, outcomes, and study design (PICOS).                                                                                                                                                  | Page 2                              |
| <b>METHODS</b>                     |    |                                                                                                                                                                                                                                                                                                             |                                     |
| Protocol and registration          | 5  | Indicate if a review protocol exists, if and where it can be accessed (e.g., Web address), and, if available, provide registration information including registration number.                                                                                                                               | Page 4                              |
| Eligibility criteria               | 6  | Specify study characteristics (e.g., PICOS, length of follow-up) and report characteristics (e.g., years considered, language, publication status) used as criteria for eligibility, giving rationale.                                                                                                      | Page 5-6                            |
| Information sources                | 7  | Describe all information sources (e.g., databases with dates of coverage, contact with study authors to identify additional studies) in the search and date last searched.                                                                                                                                  | Page 5;<br>Supplementary material 2 |
| Search                             | 8  | Present full electronic search strategy for at least one database, including any limits used, such that it could be repeated.                                                                                                                                                                               | Supplementary material 1 and 2      |
| Study selection                    | 9  | State the process for selecting studies (i.e., screening, eligibility, included in systematic review, and, if applicable, included in the meta-analysis).                                                                                                                                                   | Page 6-7                            |
| Data collection process            | 10 | Describe method of data extraction from reports (e.g., piloted forms, independently, in duplicate) and any processes for obtaining and confirming data from investigators.                                                                                                                                  | Page 7-8                            |
| Data items                         | 11 | List and define all variables for which data were sought (e.g., PICOS, funding sources) and any assumptions and simplifications made.                                                                                                                                                                       | Supplementary material 4,5,6        |
| Risk of bias in individual studies | 12 | Describe methods used for assessing risk of bias of individual studies (including specification of whether this was done at the study or outcome level), and how this information is to be used in any data synthesis.                                                                                      | Page 7                              |
| Summary measures                   | 13 | State the principal summary measures (e.g., risk ratio, difference in means).                                                                                                                                                                                                                               | Not applicable                      |

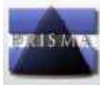

# PRISMA 2009 Checklist

1  
2  
3  
4  
5  
6  
7  
8  
9  
10  
11  
12  
13  
14  
15  
16  
17  
18  
19  
20  
21  
22  
23  
24  
25  
26  
27  
28  
29  
30  
31  
32  
33  
34  
35  
36  
37  
38  
39  
40  
41  
42  
43  
44  
45  
46  
47

|                      |    |                                                                                                                                                           |                                                        |
|----------------------|----|-----------------------------------------------------------------------------------------------------------------------------------------------------------|--------------------------------------------------------|
|                      |    |                                                                                                                                                           | as no formal synthesis of study results                |
| Synthesis of results | 14 | Describe the methods of handling data and combining results of studies, if done, including measures of consistency (e.g., $I^2$ ) for each meta-analysis. | Not applicable as no formal synthesis of study results |

Page 1 of 2

| Section/topic                 | #  | Checklist item                                                                                                                                                                                           | Reported on page #                                     |
|-------------------------------|----|----------------------------------------------------------------------------------------------------------------------------------------------------------------------------------------------------------|--------------------------------------------------------|
| Risk of bias across studies   | 15 | Specify any assessment of risk of bias that may affect the cumulative evidence (e.g., publication bias, selective reporting within studies).                                                             | Page 8; 13                                             |
| Additional analyses           | 16 | Describe methods of additional analyses (e.g., sensitivity or subgroup analyses, meta-regression), if done, indicating which were pre-specified.                                                         | Not applicable as no formal synthesis of study results |
| <b>RESULTS</b>                |    |                                                                                                                                                                                                          |                                                        |
| Study selection               | 17 | Give numbers of studies screened, assessed for eligibility, and included in the review, with reasons for exclusions at each stage, ideally with a flow diagram.                                          | Page 8                                                 |
| Study characteristics         | 18 | For each study, present characteristics for which data were extracted (e.g., study size, PICOS, follow-up period) and provide the citations.                                                             | Supplementary material 4,5,6                           |
| Risk of bias within studies   | 19 | Present data on risk of bias of each study and, if available, any outcome level assessment (see item 12).                                                                                                | Not applicable as no risk of bias conducted            |
| Results of individual studies | 20 | For all outcomes considered (benefits or harms), present, for each study: (a) simple summary data for each intervention group (b) effect estimates and confidence intervals, ideally with a forest plot. | Not applicable as no formal synthesis of study results |
| Synthesis of results          | 21 | Present the main results of the review. If meta-analyses are done, include for each, confidence intervals and measures of consistency                                                                    | Page 8-13<br>Supplementary material 5                  |
| Risk of bias across studies   | 22 | Present results of any assessment of risk of bias across studies (see Item 15).                                                                                                                          | Page 8; 13                                             |

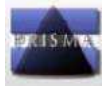

# PRISMA 2009 Checklist

1  
2  
3  
4  
5  
6  
7  
8  
9  
10  
11  
12  
13  
14  
15  
16  
17  
18  
19  
20  
21  
22  
23  
24  
25  
26  
27  
28  
29  
30  
31  
32  
33  
34  
35  
36  
37  
38  
39  
40  
41  
42  
43  
44  
45  
46  
47

|                     |    |                                                                                                                                                                                      |                                                        |
|---------------------|----|--------------------------------------------------------------------------------------------------------------------------------------------------------------------------------------|--------------------------------------------------------|
| Additional analysis | 23 | Give results of additional analyses, if done (e.g., sensitivity or subgroup analyses, meta-regression [see Item 16]).                                                                | Not applicable as no formal synthesis of study results |
| <b>DISCUSSION</b>   |    |                                                                                                                                                                                      |                                                        |
| Summary of evidence | 24 | Summarize the main findings including the strength of evidence for each main outcome; consider their relevance to key groups (e.g., healthcare providers, users, and policy makers). | Not applicable as no formal synthesis of study results |
| Limitations         | 25 | Discuss limitations at study and outcome level (e.g., risk of bias), and at review-level (e.g., incomplete retrieval of identified research, reporting bias).                        | Page 8; 13                                             |
| Conclusions         | 26 | Provide a general interpretation of the results in the context of other evidence, and implications for future research.                                                              | Page 11-13                                             |
| <b>FUNDING</b>      |    |                                                                                                                                                                                      |                                                        |
| Funding             | 27 | Describe sources of funding for the systematic review and other support (e.g., supply of data); role of funders for the systematic review.                                           | Page 14                                                |

From: Moher D, Liberati A, Tetzlaff J, Altman DG, The PRISMA Group (2009). Preferred Reporting Items for Systematic Reviews and Meta-Analyses: The PRISMA Statement. PLoS Med 6(7): e1000097. doi:10.1371/journal.pmed1000097

For more information, visit: [www.prisma-statement.org](http://www.prisma-statement.org).
