# Supplementary material for: Scoping review assessing the evidence used to support the adoption of mobile health (mHealth) technologies for the education and training of community health workers (CHWs) in low-income and middle-income countries
Source: PubMed Central journal article supplement — BMJ Open. 2018 Jul 30;8(7):e019827. doi: 10.1136/bmjopen-2017-019827 (PMC6067337; doi:10.1136/bmjopen-2017-019827), 2018-07-30
Supplement: bmjopen-2017-019827supp002.pdf [file bmjopen-2017-019827supp002.pdf]

#### Supplementary Material 4: Summary of the included primary studies

| Primary study     | Country                    | Area                    | Tool           | Methodology                                           | Number of participants / sample (n) <sup>1</sup> |
|-------------------|----------------------------|-------------------------|----------------|-------------------------------------------------------|--------------------------------------------------|
| Alam (2010)       | Bangladesh (urban)         | MCH                     | Custom design  | Case study                                            | 27 CHWs, 6 supervisors                           |
| Andreatta (2011)  | Ghana (rural)              | MCH                     | SMS            | Case study                                            | 8 traditional birth attendants, 2 midwives       |
| Barrington (2010) | Tanzania (rural)           | Malaria                 | SMS            | Pilot study                                           | Health facility workers at 129 rural clinics     |
| Chang (2011)      | Uganda (rural)             | AIDS                    | SMS            | Mixed methods: RCT and qualitative process evaluation | 29 Peer health care workers                      |
| Derenzi (2012)    | Tanzania (rural and urban) | Chronic care (esp. HIV) | CommCare       | Quasi-experimental: multiple experiments and designs  | 87 CHWs<br>n=30                                  |
| Diero (2006)      | Kenya (rural)              | Respiratory             | Palm Pilot PDA | Case study                                            | CHWs, unclear                                    |
| Zurovac (2011)    | Kenya (rural)              | Malaria                 | SMS            | Cluster RCT                                           | 119 CHWs                                         |

<sup>1</sup> Where not explicitly stated to the contrary, the number of intervention participants and the research sample was synonymous.

|                     |                            |                                                         |                            |                                               |                                              |
|---------------------|----------------------------|---------------------------------------------------------|----------------------------|-----------------------------------------------|----------------------------------------------|
| Gisore (2012)       | Kenya (rural)              | MCH                                                     | Phone and weighting scales | Case study                                    | 474 village elders                           |
| JSI (2013)          | Rwanda (unclear)           | Supply chain Management                                 | Mobile phone               | N/A (grey lit)                                | 371 CHWs                                     |
| Khan (2012)         | Pakistan (urban)           | TB                                                      | Custom design              | Quasi-experimental: retrospective controlled  | Community laypeople as TB screeners, unclear |
| Lemay (2012)        | Malawi (rural)             | Family planning/reproductive health/ HIV/AIDS knowledge | Frontline SMS              | Mixed methods                                 | 638 CHWs                                     |
| MacLeod (2012)      | Ghana (rural)              | MCH                                                     | MoTECH                     | Technical evaluation study                    | Community health volunteer, unclear          |
| Mahmud (2010)       | Malawi (rural)             | Communication                                           |                            | Pilot study                                   | 75 CHWs                                      |
| Ngabo (2012)        | Rwanda (rural)             | MCH                                                     | RapidSMS                   | Pilot study                                   | 432 CHWs                                     |
| Palazeus (2013)     | Mexico & Guatemala (rural) | Dosing                                                  | CommCare                   | Descriptive survey and qualitative interviews | 17 CHWs                                      |
| Ramachandran (2010) | India (rural)              | MCH                                                     | Java applet                | Case study                                    | 7 rural health workers                       |

|                           |                           |                  |               |                                         |                                        |
|---------------------------|---------------------------|------------------|---------------|-----------------------------------------|----------------------------------------|
| Svoronos (2010)           | Tanzania (rural)          | MCH              | CommCare      | Pilot study                             | 5 CHWs                                 |
| Tomlinson (2009)          | South Africa (peri-urban) | Data collection  | Java applet   | Pilot study                             | 24 CHWs                                |
| Blaschke (2009)           | Malawi (rural)            | Child nutrition  | RapidSMS      | Pilot study                             | Health surveillance assistant, unclear |
| Munro (2014)              | Liberia (rural)           | MCH              | SMS           | Quasi-experimental: Before/after design | 99 traditional birth attendees         |
| McNabb (2015)             | Nigeria (urban)           | MCH (ANC)        | CommCare      | Quasi-experimental Before/after design  | 152 CHWs, 20 supervisors               |
| Martínez-Fernández (2015) | Guatemala (rural)         | Infant mortality | Custom design | Case study                              | 125 Community facilitators             |
| Little (2013)             | Ethiopia (rural)          | Maternal health  | Custom design | Case study                              | 20 Health extension workers            |
| Surka (2015)              | South Africa (urban)      | CVD screening    | CommCare      | Mixed methods pilot study               | 24 CHWs                                |

## Supplementary Material 5: Categorisation and re-analysis of included studies

| COLUMN 1          |                                                                                                                                      |                                                   | COLUMN 2                                 |                             |                                                   |                                                | COLUMN 3                                |                     |                      |                                   |
|-------------------|--------------------------------------------------------------------------------------------------------------------------------------|---------------------------------------------------|------------------------------------------|-----------------------------|---------------------------------------------------|------------------------------------------------|-----------------------------------------|---------------------|----------------------|-----------------------------------|
| Primary study     | Intervention allocation                                                                                                              | Agreement in allocation between systematic review | Reclassification of intervention as WPL? |                             |                                                   |                                                | Reclassification of intervention as ML? |                     |                      |                                   |
|                   |                                                                                                                                      |                                                   | <i>Learning by-product of work</i>       | <i>Learning within work</i> | <i>Learning for work</i>                          | <i>Reclassification: fits WPL?<sup>2</sup></i> | <i>Personalisation</i>                  | <i>Authenticity</i> | <i>Collaboration</i> | <i>Reclassification: fits ML?</i> |
| Alam (2010)       | (1) Supervision & monitoring <sup>c</sup> ;<br>(2) Data collection <sup>ab</sup>                                                     | 2 different allocations                           | No evidence                              | No evidence                 | No evidence                                       | No                                             | No evidence                             | No evidence         | No evidence          | No                                |
| Andreatta (2011)  | (1) Data collection <sup>b</sup> ;<br>(2) Training & education <sup>ad</sup> ;<br>Training;<br>(3) Medication adherence <sup>e</sup> | 4 different allocations                           | No evidence                              | No evidence                 | Training in the use of a data reporting protocol. | No                                             | No evidence                             | No evidence         | No evidence          | No                                |
| Barrington (2010) | (1) Data collection <sup>b</sup> ;<br>(2) Training & education <sup>a</sup> ;<br>(3) Management <sup>e</sup>                         | 2 different allocations                           | No evidence                              | No evidence                 | Training in the use of a mobile phone.            | No                                             | No evidence                             | No evidence         | No evidence          | No                                |
| Chang (2011)      | (1) Communication <sup>f</sup><br>(2) Training &                                                                                     | 4 different allocations                           | No evidence                              | • Asking questions          | No evidence                                       | Secondary                                      | No evidence                             | No evidence         | No evidence          | No                                |

<sup>2</sup> Secondary refers to a study relating to workplace-based and/or mobile learning only superficially. This can be caused by a lack of detailed reporting of intervention design and implementation or by workplace-based and/or mobile learning only being a minor aspect of the applied intervention that is not fully developed.

|                |                                                                                                                                                      |                         |             |                                                                                                                         |                        |     |             |                                                     |             |     |
|----------------|------------------------------------------------------------------------------------------------------------------------------------------------------|-------------------------|-------------|-------------------------------------------------------------------------------------------------------------------------|------------------------|-----|-------------|-----------------------------------------------------|-------------|-----|
|                | education <sup>e</sup> ;<br>(3) Monitoring & compliance <sup>eg</sup> ;                                                                              |                         |             | <ul style="list-style-type: none"> <li>• Getting information</li> <li>• Locating resource people</li> </ul>             |                        |     |             |                                                     |             |     |
| DeRenzi (2012) | (1) Management <sup>f</sup><br>(2) Communication <sup>ab</sup><br>(3) Monitoring & compliance <sup>g</sup><br>(4) Health system support <sup>d</sup> | 4 different allocations | No evidence | No evidence                                                                                                             | No evidence            | No  | No evidence | No evidence                                         | No evidence | No  |
| Diero (2006)   | (1) Standards and guidelines <sup>d</sup>                                                                                                            | Single review           | No evidence | No evidence                                                                                                             | No evidence            | No  | No evidence | No evidence                                         | No evidence | No  |
| Zurovac (2011) | (1) Decision-support <sup>af</sup><br>(2) Monitoring & compliance <sup>edg</sup><br>(3) Training & education <sup>ad</sup>                           | 3 different allocations |             | <ul style="list-style-type: none"> <li>• Giving and receiving feedback</li> <li>• Use of mediating artefacts</li> </ul> | Being supervised       | Yes |             | Contextualisation of knowledge in practice contexts |             | Yes |
| Gisore (2012)  | (1) Data collection <sup>f</sup><br>(2) Training & education <sup>d</sup>                                                                            | 2 different allocations | No evidence | No evidence                                                                                                             | Training on tool usage | No  | No evidence | No evidence                                         | No evidence | No  |
| JSI (2013)     | (1) Supervision <sup>a</sup><br>(2) Communication <sup>a</sup>                                                                                       | Single review           | No evidence | No evidence                                                                                                             | No evidence            | No  | No evidence | No evidence                                         | No evidence | No  |
| Khan (2011)    | (1) Decision-support <sup>f</sup>                                                                                                                    | Single review           | No evidence | No evidence                                                                                                             | No evidence            | No  | No evidence | No evidence                                         | No evidence | No  |
| Lemay (2012)   | (1) Communication <sup>abd</sup>                                                                                                                     | Agreement               | No evidence | • Asking questions                                                                                                      | No evidence            | No  | No evidence | No evidence                                         | No evidence | No  |
| McLeold (2012) | (1) Supervision <sup>a</sup><br>(2) Communication <sup>a</sup>                                                                                       | Single review           | No evidence | No evidence                                                                                                             | No evidence            | No  | No evidence | No evidence                                         | No evidence | No  |
| Mahmud (2010)  | (1) Training & education <sup>de</sup><br>(2) Communication                                                                                          | 3 different allocations | No evidence | No evidence                                                                                                             | Training on tool usage | No  | No evidence | No evidence                                         | No evidence | No  |

|                     |                                                                                                                                                                                                         |                         |                                                                                                                                                            |                                                                                                                         |                                                                                                        |           |             |                                            |               |     |
|---------------------|---------------------------------------------------------------------------------------------------------------------------------------------------------------------------------------------------------|-------------------------|------------------------------------------------------------------------------------------------------------------------------------------------------------|-------------------------------------------------------------------------------------------------------------------------|--------------------------------------------------------------------------------------------------------|-----------|-------------|--------------------------------------------|---------------|-----|
|                     | <sup>af</sup><br>(3) Data collection <sup>a</sup>                                                                                                                                                       |                         |                                                                                                                                                            |                                                                                                                         |                                                                                                        |           |             |                                            |               |     |
| Ngabo (2012)        | (1) Communication <sup>af</sup><br>(2) Supervision <sup>a</sup><br>(3) Medication adherence <sup>e</sup>                                                                                                | 3 different allocations | No evidence                                                                                                                                                | No evidence                                                                                                             | Training on tool usage                                                                                 | No        | No evidence | No evidence                                | Communication | No  |
| Palazuelos (2013)   | (1) Training & education <sup>ai</sup><br>(2) Medicine adherence <sup>ai</sup>                                                                                                                          | Agreements              | No evidence                                                                                                                                                | No evidence                                                                                                             | Training on tool usage                                                                                 | No        | No evidence | No evidence                                | No evidence   | No  |
| Ramachandran (2010) | (1) Education & training <sup>ad</sup>                                                                                                                                                                  | Agreement               | No evidence                                                                                                                                                | No evidence                                                                                                             | No evidence                                                                                            | No        | No evidence | No evidence                                | No evidence   | No  |
| Svoronos (2010)     | (1) Training & education <sup>a</sup><br>(2) Decision support <sup>a</sup><br>(3) Monitoring & compliance <sup>d</sup><br>(4) Supervision & management <sup>d</sup><br>(5) Data collection <sup>b</sup> | 5 different allocations | <ul style="list-style-type: none"> <li>• Tackling challenging tasks and roles</li> <li>• Problem solving</li> <li>• Standardisation of practice</li> </ul> | <ul style="list-style-type: none"> <li>• Giving and receiving feedback</li> <li>• Use of mediating artefacts</li> </ul> | <ul style="list-style-type: none"> <li>• Being supervised</li> <li>• Training on tool usage</li> </ul> | Yes       | No evidence | Contextualised feedback & practice support | No evidence   | Yes |
| Tomlinson (2009)    | (1) Supervision and management <sup>ad</sup><br>(2) Communication <sup>a</sup><br>(3) Data collection <sup>ef</sup>                                                                                     | 3 different allocations | No evidence                                                                                                                                                | No evidence                                                                                                             | No evidence                                                                                            | No        | No evidence | No evidence                                | No evidence   | No  |
| Blaschke (2009)     | (1) Decision-support <sup>f</sup><br>(2) Data collection <sup>g</sup>                                                                                                                                   | 2 different allocations | No evidence                                                                                                                                                | <ul style="list-style-type: none"> <li>• Learning from mistakes</li> <li>• Giving and receiving feedback</li> </ul>     | <ul style="list-style-type: none"> <li>• Being supervised</li> <li>• Training on tool usage</li> </ul> | Yes       | No evidence | Contextualised feedback & practice support | No evidence   | Yes |
| McNabb (2015)       | (1) Decision-support <sup>m</sup><br>(2) Data collection <sup>l</sup>                                                                                                                                   | 2 different allocations | Tool forces practice decisions                                                                                                                             | No evidence                                                                                                             | No evidence                                                                                            | Secondary | No evidence | No evidence                                | No evidence   | No  |

|                           |                                                                                                    |                         |                                |                                      |                                                                             |           |                                      |             |             |     |
|---------------------------|----------------------------------------------------------------------------------------------------|-------------------------|--------------------------------|--------------------------------------|-----------------------------------------------------------------------------|-----------|--------------------------------------|-------------|-------------|-----|
| Martínez-Fernández (2015) | (1) Decision-support <sup>l</sup><br>(2) Data collection <sup>l</sup><br>(3) Training <sup>l</sup> | Single review           | No evidence                    | Consultation and logistical support. | Using phones for CPD                                                        | Yes       | Distance learning using mobile tools |             |             | Yes |
| Little (2013)             | (1) Data collection <sup>alno</sup><br>(2) Provider-Provider Communication <sup>n</sup>            | 2 different allocations | Tool forces practice decisions | No evidence                          | No evidence                                                                 | Secondary | No evidence                          | No evidence | No evidence | No  |
| Munro (2014)              | (1) Data collection <sup>lo</sup>                                                                  | Agreement               |                                |                                      | Learning to use and implement data collection<br><br>Training on tool usage | Secondary | No evidence                          | No evidence | No evidence | No  |
| Surka (2014)              | (1) Data collection <sup>n</sup>                                                                   | Single review           | Tool forces practice decisions | No evidence                          | Training on tool usage                                                      | Secondary | No evidence                          | No evidence | No evidence | No  |

a=Agrawal (2015); b=Chib (2015); c=Goel (2013); d=Braun (2015); e=Aranda-jan (2014); f=Hall (2014); g=Kallander (2014); h=Hurt (2014); i=O'Donovan; j=Peiris (2014); k=Bloomfield (2014); l=Colaci (2016); m=Adepoju (2017); n=White (2016); o=Amoakoh (2016); p=Tian (2017)

The superscripts a–o above refer to the systematic reviews in which this study has been included. None of these primary studies were covered by Tian (2017).

**Supplementary Material 6: Coding tool**

| Theory of learning       | Learning processes                           |                                              | Studies coded to constitute workplace and mobile learning |                 |                 |                           |
|--------------------------|----------------------------------------------|----------------------------------------------|-----------------------------------------------------------|-----------------|-----------------|---------------------------|
|                          |                                              |                                              | Zurovac (2011)                                            | Svoronos (2010) | Blaschke (2009) | Martinez-Fernandez (2015) |
| Workplace based learning | Work Processes with learning as a by-product | Participation in group processes             |                                                           |                 |                 |                           |
|                          |                                              | Working alongside others                     |                                                           |                 |                 |                           |
|                          |                                              | Consultation                                 |                                                           |                 |                 | YES                       |
|                          |                                              | Tackling challenging tasks and roles         |                                                           |                 |                 |                           |
|                          |                                              | Problem solving                              |                                                           |                 |                 |                           |
|                          |                                              | Trying things out                            |                                                           |                 |                 |                           |
|                          |                                              | Consolidating, extending and refining skills | YES                                                       |                 |                 | YES                       |
|                          |                                              | Working with                                 |                                                           |                 |                 | YES                       |



|  |                                                                      |                                                    |                  |     |                                          |     |
|--|----------------------------------------------------------------------|----------------------------------------------------|------------------|-----|------------------------------------------|-----|
|  |                                                                      | clients                                            |                  |     |                                          |     |
|  | Learning Activities located <b>within</b> work or learning processes | Asking questions                                   |                  |     |                                          |     |
|  |                                                                      | Getting information                                | YES              | YES | YES                                      | YES |
|  |                                                                      | Locating resource people                           |                  |     |                                          | YES |
|  |                                                                      | Listening & observing                              |                  |     |                                          |     |
|  |                                                                      | Reflecting                                         |                  |     |                                          |     |
|  |                                                                      | Learning from mistakes                             |                  |     |                                          |     |
|  |                                                                      | Giving and receiving feedback                      |                  |     |                                          |     |
|  |                                                                      | Use of mediating artefacts                         |                  |     |                                          |     |
|  |                                                                      | <b>Learning Processes</b> at or near the workplace | Being supervised |     | YES (see our previous table for details) |     |
|  | Being coached                                                        |                                                    |                  |     |                                          | YES |

|                 |                 |                             |                                                                                          |                                  |                                    |                                       |
|-----------------|-----------------|-----------------------------|------------------------------------------------------------------------------------------|----------------------------------|------------------------------------|---------------------------------------|
|                 |                 | Being mentored              |                                                                                          |                                  |                                    |                                       |
|                 |                 | Shadowing                   |                                                                                          |                                  |                                    |                                       |
|                 |                 | Visiting other sites        |                                                                                          |                                  |                                    |                                       |
|                 |                 | Conferences                 |                                                                                          |                                  |                                    |                                       |
|                 |                 | Short courses               |                                                                                          |                                  |                                    | YES                                   |
|                 |                 | Working for a qualification |                                                                                          |                                  |                                    |                                       |
|                 |                 | Independent study           |                                                                                          |                                  |                                    |                                       |
|                 |                 |                             |                                                                                          |                                  |                                    |                                       |
| Mobile learning | Personalisation | Agency                      | Medium: improved participants' ability to treat                                          | Low: re-enforce target behaviour |                                    | High: able to call for help as needed |
|                 |                 | Customisation               |                                                                                          |                                  |                                    |                                       |
|                 | Authenticity    | Situatedness                | High: messages received at work (but in the linked paper noted that it was not linked to | High: phones used at work        | Medium: feedback loops for the HSA | High: phones used at work             |

|  |               |                   |           |  |  |                              |
|--|---------------|-------------------|-----------|--|--|------------------------------|
|  |               |                   | training) |  |  |                              |
|  |               | Contextualisation |           |  |  |                              |
|  | Collaboration | Data sharing      |           |  |  |                              |
|  |               | Conversation      |           |  |  | High: based on communication |
